# Supplementary material for: Uranyl-Photocatalyzed Hydrolysis of Diaryl Ethers at Ambient Environment for the Directional Degradation of 4-O-5 Lignin
Source: PubMed Central journal article supplement — JACS Au. 2021 Jun 23;1(8):1141–6. doi: 10.1021/jacsau.1c00168 (PMC8397364; doi:10.1021/jacsau.1c00168), 2021-06-23
Supplement: au1c00168_si_001.pdf [file au1c00168_si_001.pdf]

## Supporting Information

# Uranyl-Photocatalyzed Hydrolysis of Diaryl Ethers at Ambient Environment for Directional Degradation of 4-O-5 Lignin

Yilin Zhou,<sup>†</sup> Deqing Hu,<sup>†</sup> Daoji Li<sup>‡</sup> and Xuefeng Jiang<sup>\*†‡§</sup>

<sup>†</sup>Shanghai Key Laboratory of Green Chemistry and Chemical Process, School of Chemistry and Molecular Engineering, East China Normal University, 3663 North Zhongshan Road, Shanghai 200062, P. R. China.

<sup>‡</sup>State Key Laboratory of Estuarine and Coastal Research, East China Normal University, 3663 North Zhongshan Road, Shanghai 200062, China

<sup>§</sup>State Key Laboratory of Organometallic Chemistry, Shanghai Institute of Organic Chemistry, Chinese Academy of Sciences, 345 Lingling Road, Shanghai 200032, P. R. China.

[xfjiang@chem.ecnu.edu.cn](mailto:xfjiang@chem.ecnu.edu.cn)

## Index

|             |                                 |            |
|-------------|---------------------------------|------------|
| <b>I.</b>   | <b>General Information.....</b> | <b>S2</b>  |
| <b>II.</b>  | <b>Mechanistic Study .....</b>  | <b>S3</b>  |
| <b>III.</b> | <b>General Procedures.....</b>  | <b>S7</b>  |
| <b>IV.</b>  | <b>Procedures and Data.....</b> | <b>S8</b>  |
| <b>V.</b>   | <b>NMR Spectra.....</b>         | <b>S25</b> |
| <b>VI.</b>  | <b>References.....</b>          | <b>S84</b> |

## **I. General Information**

### **NMR Spectrum:**

<sup>1</sup>H and <sup>13</sup>C spectra were collected on 400 MHz or 500 MHz NMR spectrometers (Bruker AVANCE). Chemical shifts for protons are reported in parts per million (ppm) downfield and are referenced to residual protium in the NMR solvent (CHCl<sub>3</sub> = δ 7.26, DMSO = δ 2.50). Chemical shifts for carbon are reported in parts per million downfield and are referenced to the carbon resonances of solvent (CHCl<sub>3</sub> = δ 77.00, DMSO = δ 39.52). Data are represented as follows: chemical shift, multiplicity (brs = broad singlet, s = singlet, d = doublet, t = triplet, q = quartet, m = multiplet), coupling constants in Hertz (Hz), integration.

### **Mass Spectroscopy:**

Mass spectra were in general recorded on a Shimadzu GCMS-QP2010 Ultra and a HP 5989A mass selective detector.

### **Chromatography:**

Column chromatography was performed with silica gel (300 – 400 mesh ASTM).

### **IR:**

SHIMADZU IR Tracer-100 Spectrometers.

### **Solvent:**

Acetonitrile (CH<sub>3</sub>CN) was bought and used without further purification, and acetone was freshly distilled with CaSO<sub>4</sub> at 80°C.

### **Starting materials:**

Except for those commercially available, other diphenyl ether derivatives were prepared adopting reported procedures.<sup>1</sup>

## II. Mechanistic Study

### 1) Radical Quenching Experience

All reactions were operated under standard conditions with extra 2,2,6,6-tetramethyl-1-piperinedinyloxy (TEMPO) or butylated hydroxytoluene (BHT). The yields were determined by NMR yields with  $\text{CH}_2\text{Br}_2$  as the internal standard.

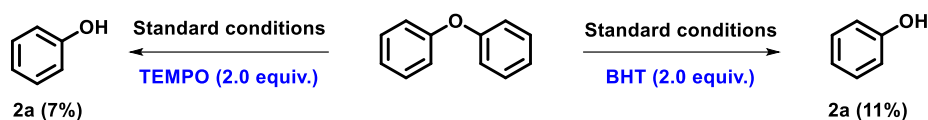

Radical quenching experiments revealed that TEMPO or BHT could efficiently quench the process of the cleavage of C-O bond, suggested the radical property of this system.

### 2) Ultraviolet-Visible Absorption Experiments

Ultraviolet-visible absorption experiments were performed using a Shimadzu UV-2700 UV-visible spectrophotometer. In each experiment, the varying samples were combined in acetone in screw-top 1.0 cm quartz cuvettes. The concentration of each component was  $4 \times 10^{-3}$  M.

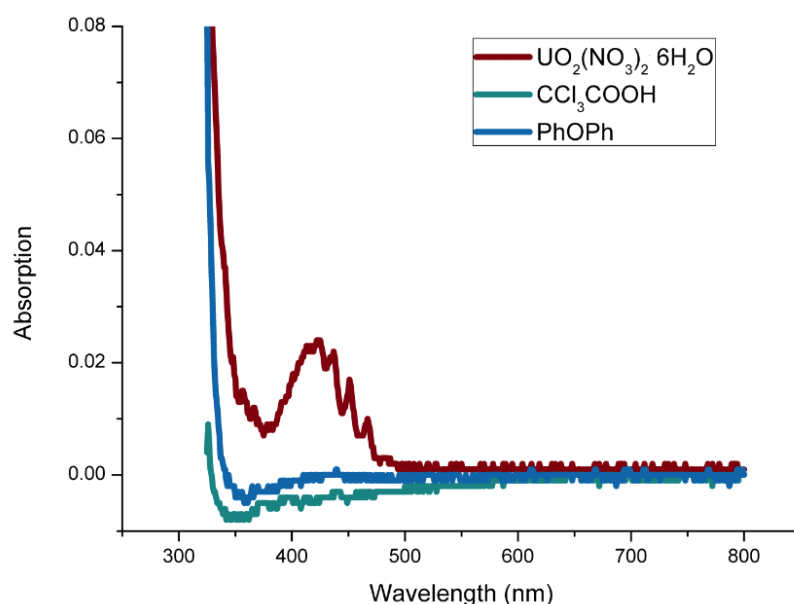

**Figure S1.** UV-Vis experiments of  $\text{UO}_2(\text{NO}_3)_2 \cdot 6\text{H}_2\text{O}$ ,  $\text{CCl}_3\text{COOH}$  and PhOPh.

Uranyl cation was approved to serve as photosensor at 424 nm.

### 3) Stern–Volmer Fluorescence Quenching Experiments with $\text{UO}_2(\text{NO}_3)_2 \cdot 6\text{H}_2\text{O}$

Fluorescence quenching studies were performed using a Shimadzu RF-6000 Fluorescence Spectrophotometer. In each experiment, the photoredox catalyst and varying concentrations of quencher were combined in acetone in screw-top 1.0 cm quartz cuvettes. For the emission quenching of  $\text{UO}_2(\text{NO}_3)_2 \cdot 6\text{H}_2\text{O}$ , the photoredox catalyst concentration was  $4 \times 10^{-3}$  M, the solution was irradiated at 424 nm.

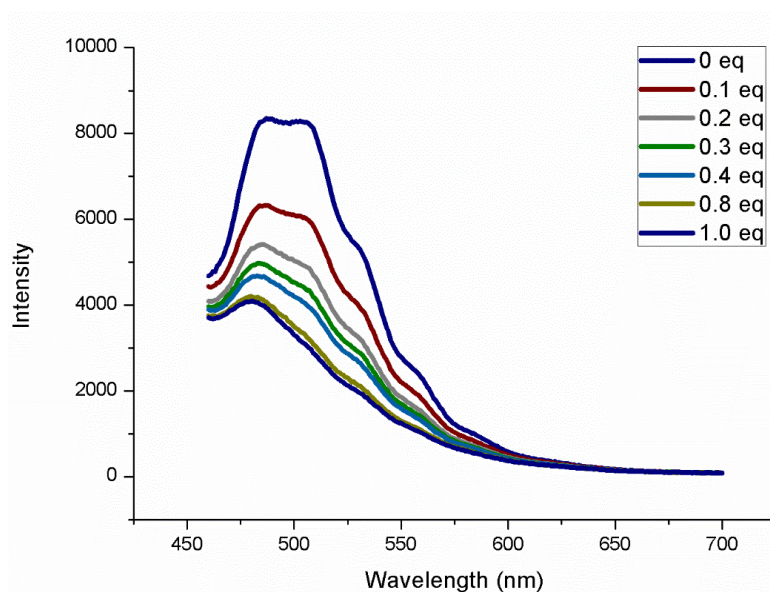

**Figure S2.** Quenching experiments of  $\text{UO}_2(\text{NO}_3)_2 \cdot 6\text{H}_2\text{O}$  with PhOPh.

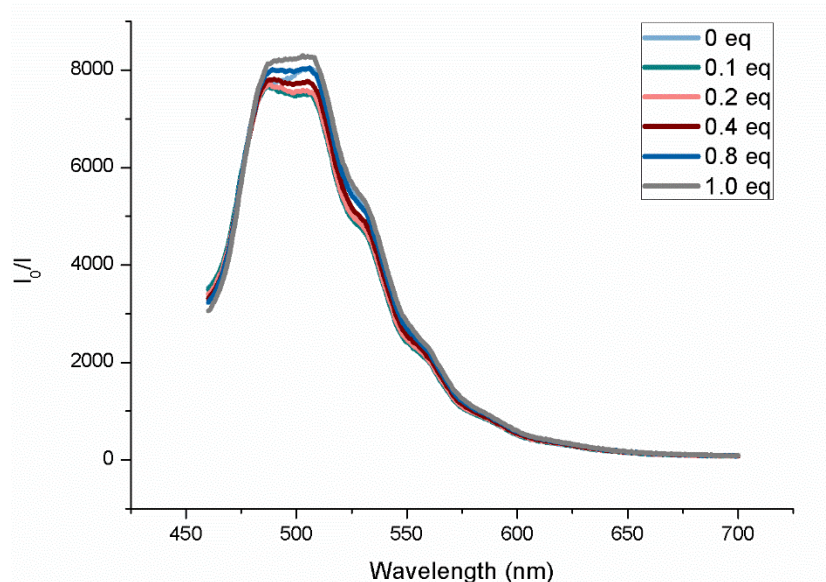

**Figure S3.** Quenching experiments of  $\text{UO}_2(\text{NO}_3)_2 \cdot 6\text{H}_2\text{O}$  with  $\text{CCl}_3\text{COOH}$ .

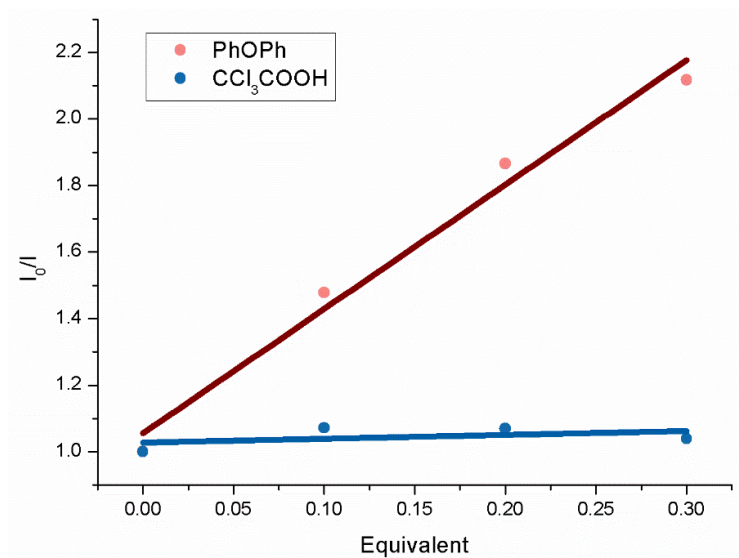

**Figure S4.** Stern-Volmer plot of Fluorescence Quenching Experiments

*The Stern-Volmer analysis revealed that the excited state of  $UO_2(NO_3)_2 \cdot 6H_2O$  photoredox catalysis is efficiently quenched by PhOPh in acetone at room temperature.*

#### 4) Oxygen Labelling Experiment

To a 25 mL Schlenk tube, diaryl ether (0.2 mmol),  $UO_2(NO_3)_2 \cdot 6H_2O$  (4 mol%/0.008 mmol, 4 mg),  $CCl_3COOH$  (0.4 mmol, 65.2 mg) and  $H_2^{18}O$  (4 mmol) were stirred in  $CH_3CN$  (2 mL) at room temperature for 48 h under blue light (460 nm) in a paralleled reactor in  $N_2$ . The yields of each phenol were determined were by  $^1H$  NMR with  $CH_2Br_2$  as the internal standard and GC-MS.

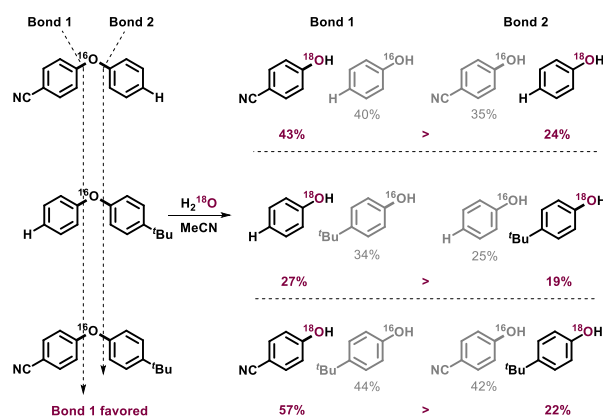

**Figure S5.** Investigation of Cut-off Bond.

*Investigation of Cut-off Bond via  $^{18}O$ -labeling experiment depicted the cleavage trend on the bias of low electron cloud density side.*

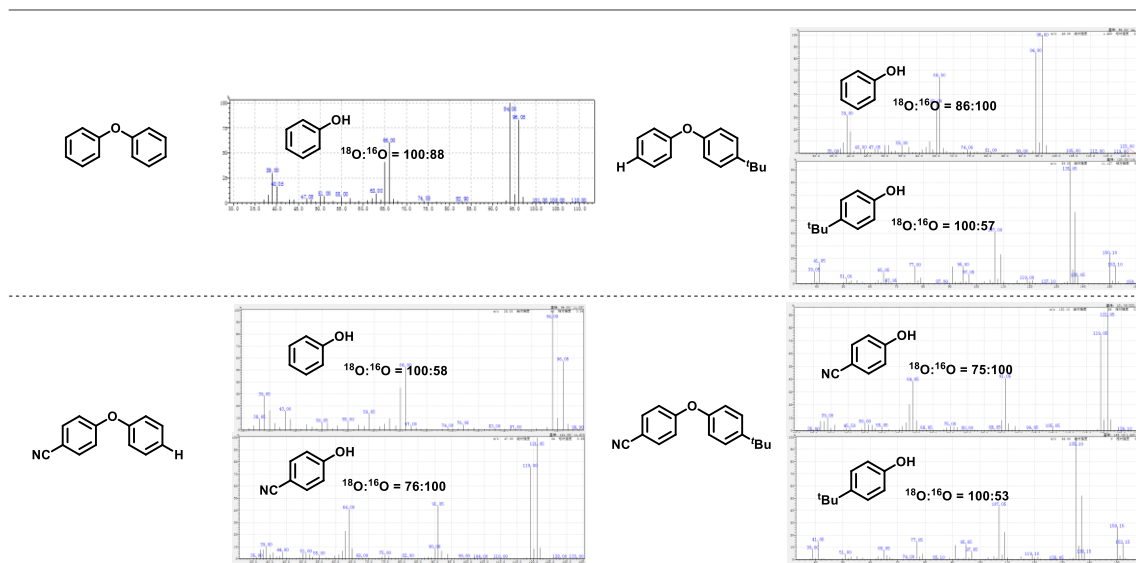

Figure S6. Ratio of phenol products with  $^{18}\text{O}$  and  $^{16}\text{O}$ .

## 5) Hammett Plot

To a 25 mL Schlenk tube, diaryl ether (0.1 mmol),  $\text{UO}_2(\text{NO}_3)_2 \cdot 6\text{H}_2\text{O}$  (4 mol%/0.004 mmol, 2.0 mg) and  $\text{CCl}_3\text{COOH}$  (0.2 mmol, 32.6 mg) were stirred in freshly-distilled acetone (2 mL) at room temperature for 48 h under blue light (460 nm, 12W) in a paralleled reactor in  $\text{N}_2$ . The yields were determined by  $^1\text{H}$  NMR with  $\text{CH}_2\text{Br}_2$  as the internal standard.

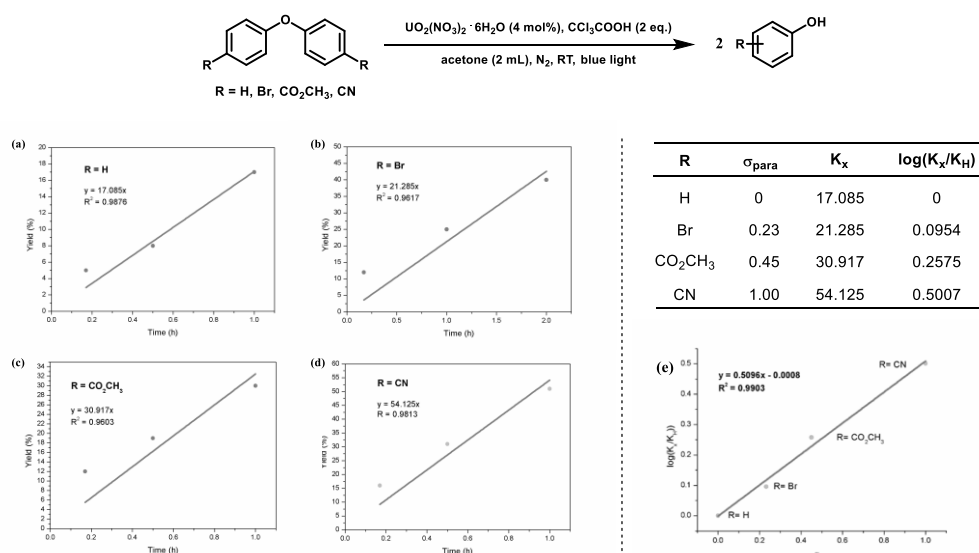

Figure S7. Hammett plot. a) Rate for diphenyl ether. b) Rate for diaryl ether with -Br. c) Rate for diaryl ether with  $-\text{CO}_2\text{CH}_3$ . d) Rate for diaryl ether with -CN. e) Hammett plot for cleavage of C-O bond. Equation:  $y = 0.5096x - 0.0008$ ;  $R^2 = 0.9903$ .

$\rho$  value of +0.5096 for reactions showed that electron-withdrawing groups promoted the transformation and the decisive step was the process of negative charge accumulation.

### III. General Procedures

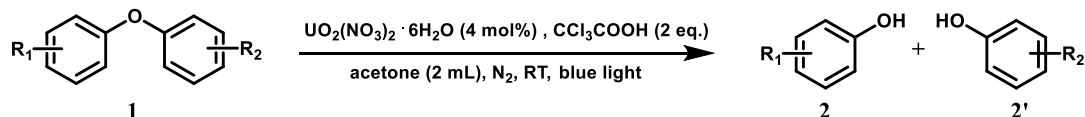

To a 25 mL Schlenk tube, diphenyl ether (0.4 mmol), UO<sub>2</sub>(NO<sub>3</sub>)<sub>2</sub> · 6H<sub>2</sub>O (4 mol%/0.008 mmol, 4 mg), CCl<sub>3</sub>COOH (0.8 mmol, 130.7 mg) and freshly distilled acetone (2 mL) were added. The tube was evacuated and filled with N<sub>2</sub> three times at -78 °C then stirred for 48 h under blue LEDs (460 nm, 9 W) in a paralleled reactor. After evaporation of solvent, the residue was purified by column chromatography on silica gel using PE/EA to afford the corresponding phenols. For detailed modification, please see the corresponding procedure.

#### IV. Procedures and Data

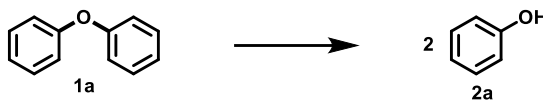

To a 25 mL Schlenk tube, diphenyl ether (0.4 mmol, 68.0 mg),  $\text{UO}_2(\text{NO}_3)_2 \cdot 6\text{H}_2\text{O}$  (4 mol%/0.016 mmol, 8 mg),  $\text{CCl}_3\text{COOH}$  (0.8 mmol, 130.7 mg) and freshly distilled acetone (2 mL) were added. The tube was evacuated and filled with  $\text{N}_2$  three times at  $-78^\circ\text{C}$  then stirred for 48 h under blue LEDs (3x3W, 460 nm) in a paralleled reactor. **2a**<sup>2</sup> (60.2 mg, 80%) was obtained through column chromatography ( $V_{\text{PE}}/V_{\text{EA}} = 10/1$ ) as a brown liquid.  $^1\text{H NMR}$  (400 MHz,  $\text{CDCl}_3$ )  $\delta$  7.28 - 7.24 (m, 2H), 6.95 (t,  $J = 8.0$  Hz, 1H), 6.85 (d,  $J = 8.0$  Hz, 2H), 5.02 (brs, 1H).  $^{13}\text{C NMR}$  (100 MHz,  $\text{CDCl}_3$ )  $\delta$  155.3, 129.7, 120.8, 115.3. **IR** (neat) 3237, 1594, 1498, 1472, 1221, 1071, 810  $\text{cm}^{-1}$ . **MS** (EI)  $m/z$  94.

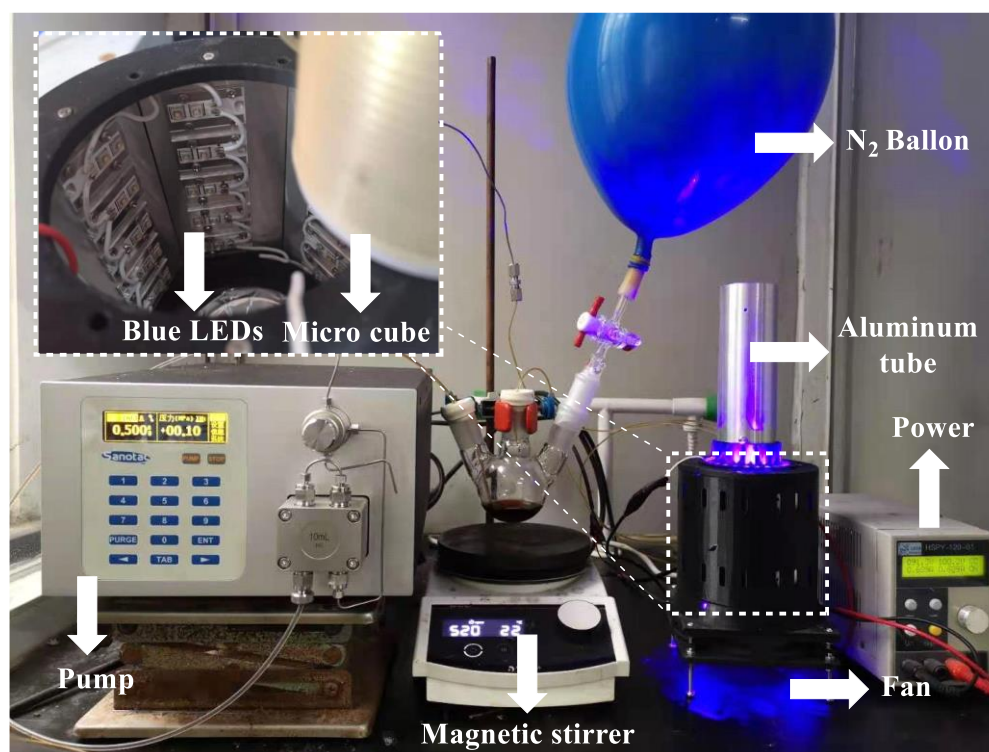

**Figure S8.** Flow Reaction Photoreactor.

**Flow reaction:** To a 250 mL three-necked flask, a solution of diphenyl ether (10.0 mmol, 1.70g),  $\text{UO}_2(\text{NO}_3)_2 \cdot 6\text{H}_2\text{O}$  (4 mol%/0.4 mmol, 201 mg) and  $\text{CCl}_3\text{COOH}$  (20.0 mmol, 3.26 g) in freshly-distilled acetone (50 mL) was added. The flask was equipped



with rubber plugs, with inlet and outlet of micro tube, which was made of PTFE tubing (O.D. = 2 mm, I.D. = 1 mm, length = 5.68 m, volume = 4.45 mL). Then the flask along with the micro tube were evacuated and filled with N<sub>2</sub> three times at -78 °C. The solution was pumped by a pump (0.5 mL/min) into the micro tube, then returned to flask. This circulatory system was irradiated by blue LEDs (430 nm, 54 W totally) for 72 h (the temperature was below 30 °C). After the reaction, acetone (10 mL) was pumped into the tube to flush out residual fluid. The solvent was removed in vacuo and the crude residue was purified through column chromatography on silica gel using PE/EA (10/1) to afford **2a** (1.16 g, 62%) as a brown liquid.

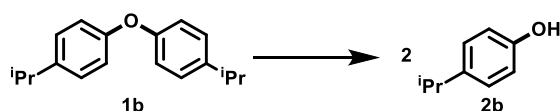

To a 25 mL Schlenk tube, 4,4'-oxybis(isopropylbenzene) (0.2 mmol, 50.8 mg), UO<sub>2</sub>(NO<sub>3</sub>)<sub>2</sub>·6H<sub>2</sub>O (4 mol%/0.008 mmol, 4 mg), CCl<sub>3</sub>COOH (0.4 mmol, 65.4 mg) and freshly distilled acetone (2 mL) were added. The tube was evacuated and filled with N<sub>2</sub> three times at -78 °C then stirred for 48 h under blue light (460nm, 9W) in a paralleled reactor. **2b**<sup>3</sup> (34.8 mg, 64%) was obtained through column chromatography (V<sub>PE</sub>/V<sub>EA</sub> = 10/1) as a brown solid. <sup>1</sup>H NMR (400 MHz, CDCl<sub>3</sub>) δ 7.11 (d, *J* = 8.0 Hz, 2H), 6.78 (d, *J* = 8.0 Hz, 2H), 4.43 (brs, 1H), 2.89 - 2.83 (m, 1H), 1.23 (d, *J* = 8.0 Hz, 6H). <sup>13</sup>C NMR (100 MHz, CDCl<sub>3</sub>) δ 153.3, 127.4, 115.1, 33.3, 24.2. IR (neat) 3317, 2959, 1612, 1512, 1225, 1174, 827 cm<sup>-1</sup>. MS (EI) *m/z* 136.

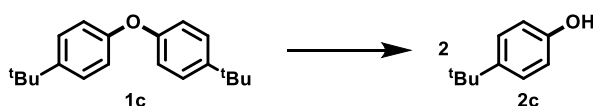

To a 25 mL Schlenk tube, 4,4'-oxybis(tert-butylbenzene) (0.2 mmol, 56.4 mg), UO<sub>2</sub>(NO<sub>3</sub>)<sub>2</sub>·6H<sub>2</sub>O (4 mol%/0.008 mmol, 4 mg), CCl<sub>3</sub>COOH (0.4 mmol, 65.4 mg) and freshly distilled acetone (2 mL) were added. The tube was evacuated and filled with N<sub>2</sub> three times at -78 °C then stirred for 48 h under blue LEDs (460 nm, 9W) in a paralleled reactor. **2c**<sup>4</sup> (40.8 mg, 68 %) was obtained through column chromatography (V<sub>PE</sub>/V<sub>EA</sub> =) as a white solid. <sup>1</sup>H NMR (400 MHz, CDCl<sub>3</sub>) δ 7.32 - 7.28 (m, 2H), 6.84 - 6.80 (m,

2H), 4.95 (brs, 1H), 1.34 (s, 9H).  $^{13}\text{C}$  NMR (100 MHz,  $\text{CDCl}_3$ )  $\delta$  153.1, 143.6, 126.4, 114.7, 34.0, 31.5. IR (neat) 3235, 2961, 1703, 1515, 1361, 1232, 1181  $\text{cm}^{-1}$ . MS (EI)  $m/z$  150.

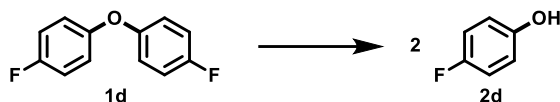

To a 25 mL Schlenk tube, 4,4'-oxybis(2-fluorobenzene) (0.2 mmol, 41.2 mg),  $\text{UO}_2(\text{NO}_3)_2 \cdot 6\text{H}_2\text{O}$  (4 mol%/0.008 mmol, 4 mg),  $\text{CCl}_3\text{COOH}$  (0.4 mmol, 65.4 mg) and freshly distilled acetone (2 mL) were added. The tube was evacuated and filled with  $\text{N}_2$  three times at  $-78^\circ\text{C}$  then stirred for 48 h under blue light (460nm, 9W) in a paralleled reactor.  $2\text{d}^4$  (21.9 mg, 49%) was obtained through column chromatography ( $V_{\text{PE}}/V_{\text{EA}} = 10/1$ ) as a brown liquid.  $^1\text{H}$  NMR (400 MHz,  $\text{CDCl}_3$ )  $\delta$  6.95 - 6.91 (m, 2H), 6.79 - 6.75 (m, 2H), 4.71 (brs, 1H).  $^{13}\text{C}$  NMR (100 MHz,  $\text{CDCl}_3$ )  $\delta$  157.3 (d,  $J = 237$  Hz), 151.4 (d,  $J = 2.0$  Hz), 116.2 (d,  $J = 8.0$  Hz), 116.0 (d,  $J = 23.0$  Hz).  $^{19}\text{F}$  NMR (376 MHz,  $\text{CDCl}_3$ )  $\delta$  -124.16. IR (neat) 3346, 1507, 1223, 1195, 1091, 829, 746  $\text{cm}^{-1}$ . MS (EI)  $m/z$  112.

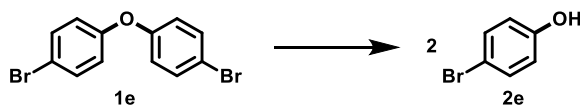

To a 25 mL Schlenk tube, 4,4'-oxybis(2-bromobenzene) (0.2 mmol, 65.2 mg),  $\text{UO}_2(\text{NO}_3)_2 \cdot 6\text{H}_2\text{O}$  (4 mol%/0.008 mmol, 4 mg),  $\text{CCl}_3\text{COOH}$  (0.4 mmol, 65.4 mg) and freshly distilled acetone (2 mL) were added. The tube was evacuated and filled with  $\text{N}_2$  three times at  $-78^\circ\text{C}$  then stirred for 72 h under blue light (460nm, 9W) in a paralleled reactor.  $2\text{e}^5$  (49.5 mg, 72%) was obtained through column chromatography ( $V_{\text{PE}}/V_{\text{EA}} = 10/1$ ) as a brown liquid.  $^1\text{H}$  NMR (400 MHz,  $\text{CDCl}_3$ )  $\delta$  7.35 - 7.32 (m, 2H), 6.74 - 6.70 (m, 2H), 4.96 (brs, 1H).  $^{13}\text{C}$  NMR (100 MHz,  $\text{CDCl}_3$ )  $\delta$  154.5, 132.5, 117.2, 112.9. IR (neat) 3322, 1559, 1491, 1432, 1165, 1091, 1009  $\text{cm}^{-1}$ . MS (EI)  $m/z$  172.

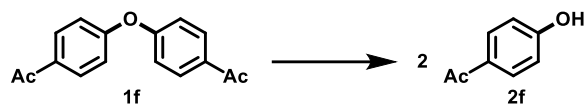

To a 25 mL Schlenk tube, 1,1'-(oxybis(4,1-phenylene))bis(ethan-1-one) (0.2 mmol, 50.8 mg),  $\text{UO}_2(\text{NO}_3)_2 \cdot 6\text{H}_2\text{O}$  (4 mol%/0.008 mmol, 4 mg),  $\text{CCl}_3\text{COOH}$  (0.4 mmol, 65.4 mg) and freshly distilled acetone (2 mL) were added. The tube was evacuated and filled with  $\text{N}_2$  three times at  $-78^\circ\text{C}$  then stirred for 48 h under blue light (460nm, 9W) in a paralleled reactor. **2f**<sup>5</sup> (39.2 mg, 72%) was obtained through column chromatography ( $V_{\text{PE}}/V_{\text{EA}} = 5/1$ ) as a brown solid. **<sup>1</sup>H NMR** (400 MHz,  $\text{CDCl}_3$ )  $\delta$  7.91 (d,  $J = 8.0$  Hz, 2H), 6.90 (d,  $J = 8.0$  Hz, 2H), 6.24 (brs, 1H), 2.56 (s, 3H). **<sup>13</sup>C NMR** (100 MHz,  $\text{CDCl}_3$ )  $\delta$  198.0, 160.9, 131.1, 129.8, 115.5, 26.3. **IR** (neat) 3384, 1587, 1525, 1488, 1350, 1069,  $1006\text{ cm}^{-1}$ . **MS** (EI)  $m/z$  136.

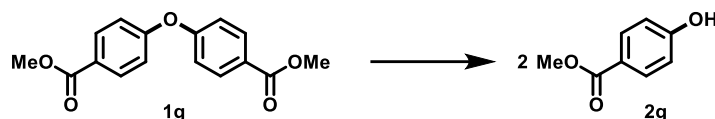

To a 25 mL Schlenk tube, dimethyl 4,4'-oxydibenzoate (0.2 mmol, 57.2 mg),  $\text{UO}_2(\text{NO}_3)_2 \cdot 6\text{H}_2\text{O}$  (4 mol%/0.008 mmol, 4 mg),  $\text{CCl}_3\text{COOH}$  (0.4 mmol, 65.4 mg) and freshly distilled acetone (2 mL) were added. The tube was evacuated and filled with  $\text{N}_2$  three times at  $-78^\circ\text{C}$  then stirred for 48 h under blue light (460nm, 9W) in a paralleled reactor. **2g**<sup>5</sup> (53.5 mg, 88%) was obtained through column chromatography ( $V_{\text{PE}}/V_{\text{EA}} = 5/1$ ) as a white solid. **<sup>1</sup>H NMR** (400 MHz,  $\text{CDCl}_3$ )  $\delta$  7.95 (d,  $J = 8.0$  Hz, 2H), 6.88 (d,  $J = 8.0$  Hz, 2H), 3.90 (s, 3H). **<sup>13</sup>C NMR** (100 MHz,  $\text{CDCl}_3$ )  $\delta$  167.4, 160.1, 131.9, 122.3, 115.2, 52.0. **IR** (neat) 3276, 1688, 1438, 1235, 1172, 859,  $770\text{ cm}^{-1}$ . **MS** (EI)  $m/z$  152.

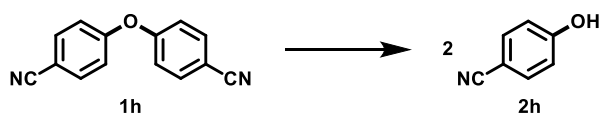

To a 25 mL Schlenk tube, 4,4'-oxydibenzonitrile (0.2 mmol, 44.0 mg),  $\text{UO}_2(\text{NO}_3)_2 \cdot 6\text{H}_2\text{O}$  (4 mol%/0.008 mmol, 4 mg),  $\text{CCl}_3\text{COOH}$  (0.4 mmol, 65.4 mg) and freshly distilled acetone (2 mL) were added. The tube was evacuated and filled with  $\text{N}_2$  three times at  $-78^\circ\text{C}$  then stirred for 48 h under blue light (460nm, 9W) in a paralleled

reactor. **2h**<sup>5</sup> (46.2 mg, 97%) was obtained through column chromatography ( $V_{PE}/V_{EA} = 5/1$ ) as a white solid. **<sup>1</sup>H NMR** (400 MHz, CDCl<sub>3</sub>) δ 7.55 (d,  $J = 8.7$  Hz, 2H), 6.93 (d,  $J = 8.7$  Hz, 2H), 6.49 (brs, 1H). **<sup>13</sup>C NMR** (100 MHz, CDCl<sub>3</sub>) δ 160.0, 134.3, 119.2, 116.4, 103.2. **IR** (neat) 3293, 2235, 1610, 1587, 1510, 1286, 1167 cm<sup>-1</sup>. **MS** (EI)  $m/z$  119.

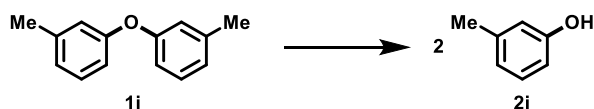

To a 25 mL Schlenk tube, 3,3'-oxybis(methylbenzene) (0.2 mmol, 39.6 mg), UO<sub>2</sub>(NO<sub>3</sub>)<sub>2</sub>·6H<sub>2</sub>O (4 mol%/0.008 mmol, 4 mg), CCl<sub>3</sub>COOH (0.4 mmol, 65.4 mg) and freshly distilled acetone (2 mL) were added. The tube was evacuated and filled with N<sub>2</sub> three times at -78 °C then stirred for 48 h under blue light (460nm, 9W) in a paralleled reactor. **2i**<sup>5</sup> (35.8 mg, 83%) was obtained through column chromatography ( $V_{PE}/V_{EA} = 10/1$ ) as a pink liquid. **<sup>1</sup>H NMR** (400 MHz, CDCl<sub>3</sub>) δ 7.13 (t,  $J = 8.0$  Hz, 1H), 6.75 (d,  $J = 8.0$  Hz, 1H), 6.65 (d,  $J = 12.0$  Hz, 2H), 4.87 (brs, 1H), 2.31 (s, 3H). **<sup>13</sup>C NMR** (100 MHz, CDCl<sub>3</sub>) δ 155.3, 139.8, 129.4, 121.6, 116.0, 112.2, 21.3. **IR** (neat) 3314, 1589, 1491, 1278, 1154, 926, 773 cm<sup>-1</sup>. **MS** (EI)  $m/z$  108.

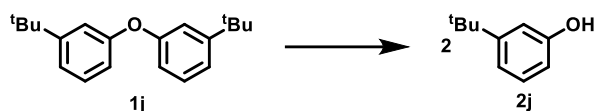

To a 25 mL Schlenk tube, 3,3'-oxybis(tert-butylbenzene) (0.4 mmol, 113.0 mg), UO<sub>2</sub>(NO<sub>3</sub>)<sub>2</sub>·6H<sub>2</sub>O (4 mol%/0.016 mmol, 8 mg), CCl<sub>3</sub>COOH (0.8 mmol, 130.7 mg) and freshly distilled acetone (2 mL) were added. The tube was evacuated and filled with N<sub>2</sub> three times at -78 °C then stirred for 72 h under blue light (460nm, 9W) in a paralleled reactor. **2j**<sup>6</sup> (84.1 mg, 74%) was obtained through column chromatography ( $V_{PE}/V_{EA} = 10/1$ ) as a white solid. **<sup>1</sup>H NMR** (400 MHz, CDCl<sub>3</sub>) δ 7.18 (t,  $J = 8.0$  Hz, 1H), 6.99 - 6.97 (m, 1H), 6.88 - 6.87 (m, 1H), 6.67 - 6.64 (m, 1H), 4.81 (brs, 1H), 1.31 (s, 9H). **<sup>13</sup>C NMR** (100 MHz, CDCl<sub>3</sub>) δ 155.2, 153.3, 129.1, 117.8, 112.5, 112.2, 34.6, 31.2. **IR** (neat) 3307, 2963, 1451, 1280, 914, 780, 699 cm<sup>-1</sup>. **MS** (EI)  $m/z$  150.

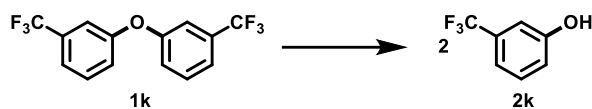

To a 25 mL Schlenk tube, 3,3'-oxybis((trifluoromethyl)benzene) (0.4 mmol, 122.4 mg), UO<sub>2</sub>(NO<sub>3</sub>)<sub>2</sub>·6H<sub>2</sub>O (4 mol%/0.016 mmol, 8 mg), CCl<sub>3</sub>COOH (0.8 mmol, 130.7 mg) and freshly distilled acetone (2 mL) were added. The tube was evacuated and filled with N<sub>2</sub> three times at -78 °C then stirred for 72 h under blue light (460nm, 9W) in a paralleled reactor. **2k**<sup>7</sup> (106.3 mg, 82%) was obtained through column chromatography (V<sub>PE</sub>/V<sub>EA</sub> = 10/1) as a brown liquid. **<sup>1</sup>H NMR** (400 MHz, CDCl<sub>3</sub>) δ 7.36 (t, *J* = 8.0 Hz, 1H), 7.22 (d, *J* = 8.0 Hz, 1H), 7.10 (s, 1H), 7.02 (dd, *J* = 8.0, 4.0 Hz, 1H), 5.59 (brs, 1H). **<sup>13</sup>C NMR** (100 MHz, CDCl<sub>3</sub>) 155.3, 132.1 (q, *J* = 32.4 Hz), 130.3, 123.7 (q, *J* = 272.3 Hz), 118.8 (d, *J* = 1.0 Hz), 117.8 (q, *J* = 3.9 Hz), 112.3 (q, *J* = 3.8 Hz). **<sup>19</sup>F NMR** (376 MHz, CDCl<sub>3</sub>) δ -62.80. **IR** (neat) 3356, 1460, 1332, 1128, 1064, 894, 791 cm<sup>-1</sup>. **MS** (EI) *m/z* 162.

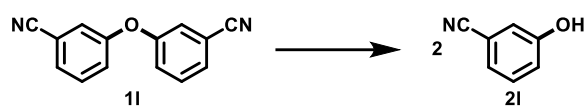

To a 25 mL Schlenk tube, 3,3'-oxydibenzonitrile (0.4 mmol, 88.0 mg), UO<sub>2</sub>(NO<sub>3</sub>)<sub>2</sub>·6H<sub>2</sub>O (4 mol%/0.016 mmol, 8 mg), CCl<sub>3</sub>COOH (0.8 mmol, 130.7 mg) and freshly distilled acetone (2 mL) were added. The tube was evacuated and filled with N<sub>2</sub> three times at -78 °C then stirred for 72 h under blue light (430 nm, 12W) in a paralleled reactor. **21**<sup>5</sup> (78.0 mg, 82%) was obtained through column chromatography (V<sub>PE</sub>/V<sub>EA</sub> = 5/1) as a brown solid. **<sup>1</sup>H NMR** (400 MHz, CDCl<sub>3</sub>) δ 7.34 (t, *J* = 8.0 Hz, 1H), 7.26 - 7.22 (m, 1H), 7.14 (m, 1H), 7.11 - 7.09 (m, 1H), 5.90 (brs, 1H). **<sup>13</sup>C NMR** (100 MHz, CDCl<sub>3</sub>) δ 156.1, 130.6, 124.5, 120.7, 118.7, 118.5, 112.8. **IR** (neat) 3410, 2924, 2242, 1599, 1584, 1318, 1287 cm<sup>-1</sup>. **MS** (EI) *m/z* 119.

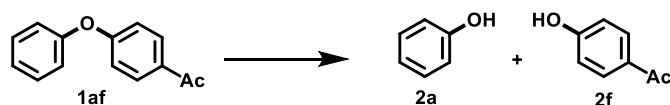

To a 25 mL Schlenk tube, 1-(4-phenoxyphenyl)ethan-1-one (0.2 mmol, 42.4 mg),

UO<sub>2</sub>(NO<sub>3</sub>)<sub>2</sub>·6H<sub>2</sub>O (4 mol%/0.008 mmol, 4 mg), CCl<sub>3</sub>COOH (0.4 mmol, 65.4 mg) and freshly distilled acetone (2 mL) were added. The tube was evacuated and filled with N<sub>2</sub> three times at -78 °C then stirred for 72 h under blue light (460nm, 9W) in a paralleled reactor. **2f** was obtained through column chromatography (V<sub>PE</sub>/V<sub>EA</sub> = 5/1) as a brown solid (21.5 mg, 79%). **2a** was obtained through column chromatography (V<sub>PE</sub>/V<sub>EA</sub> = 10/1) as a brown liquid (7.5 mg, 40%).

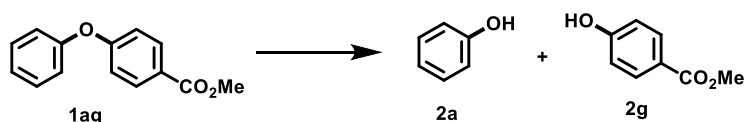

To a 25 mL Schlenk tube, methyl 4-phenoxybenzoate (0.2 mmol, 45.6 mg), UO<sub>2</sub>(NO<sub>3</sub>)<sub>2</sub>·6H<sub>2</sub>O (4 mol%/0.008 mmol, 4 mg), CCl<sub>3</sub>COOH (0.4 mmol, 65.4 mg) and freshly distilled acetone (2 mL) were added. The tube was evacuated and filled with N<sub>2</sub> three times at -78 °C then stirred for 72 h under blue light (460nm, 9W) in a paralleled reactor. **2g** was obtained through column chromatography (V<sub>PE</sub>/V<sub>EA</sub> = 5/1) as a white solid (21.3 mg, 70%). **2a** was obtained through column chromatography (V<sub>PE</sub>/V<sub>EA</sub> = 10/1) as a brown liquid (11.7 mg, 62%).

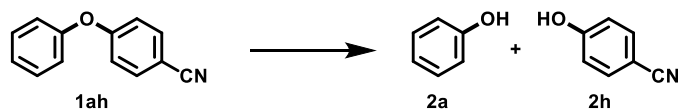

To a 25 mL Schlenk tube, 4-phenoxybenzocarbonitrile (0.2 mmol, 39.0 mg), UO<sub>2</sub>(NO<sub>3</sub>)<sub>2</sub>·6H<sub>2</sub>O (4 mol%/0.008 mmol, 4 mg), CCl<sub>3</sub>COOH (0.4 mmol, 65.4 mg) and freshly distilled acetone (2 mL) were added. The tube was evacuated and filled with N<sub>2</sub> three times at -78 °C then stirred for 72 h under blue light (460nm, 9W) in a paralleled reactor. **2h** was obtained through column chromatography (V<sub>PE</sub>/V<sub>EA</sub> = 5/1) as a white solid (23.4 mg, 99%). **2a** was obtained through column chromatography (V<sub>PE</sub>/V<sub>EA</sub> = 10/1) as a brown liquid (13.2 mg, 70%).

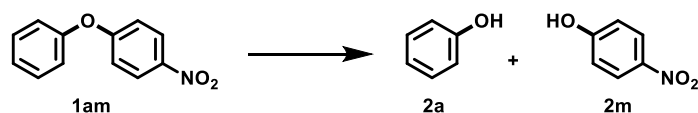

To a 25 mL Schlenk tube, 1-nitro-4-phenoxybenzene (0.2 mmol, 43.0 mg),  $\text{UO}_2(\text{NO}_3)_2 \cdot 6\text{H}_2\text{O}$  (4 mol%/0.008 mmol, 4 mg),  $\text{CCl}_3\text{COOH}$  (0.4 mmol, 65.4 mg) and freshly distilled acetone (2 mL) were added. The tube was evacuated and filled with  $\text{N}_2$  three times at  $-78^\circ\text{C}$  then stirred for 72 h under blue light (460nm, 9W) in a paralleled reactor. **2a** was obtained through column chromatography ( $V_{\text{PE}}/V_{\text{EA}} = 10/1$ ) as a brown liquid (13.7 mg, 73%). **2m<sup>8</sup>** was obtained through column chromatography ( $V_{\text{PE}}/V_{\text{EA}} = 5/1$ ) as a yellow solid (19.2 mg, 69%). **<sup>1</sup>H NMR** (400 MHz,  $\text{CDCl}_3$ )  $\delta$  8.19 - 8.15 (m, 2H), 6.94 - 6.90 (m, 2H), 6.20 (brs, 1H). **<sup>13</sup>C NMR** (100 MHz,  $\text{CDCl}_3$ )  $\delta$  161.5, 141.5, 126.2, 115.7. **IR** (neat) 3366, 1613, 1595, 1335, 1297, 1114, 844  $\text{cm}^{-1}$ . **MS** (EI)  $m/z$  139.

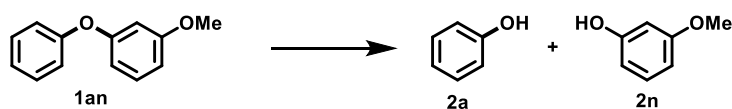

To a 25 mL Schlenk tube, 1-methoxy-3-phenoxybenzene (0.4 mmol, 80.0 mg),  $\text{UO}_2(\text{NO}_3)_2 \cdot 6\text{H}_2\text{O}$  (4 mol%/0.016 mmol, 8 mg),  $\text{CCl}_3\text{COOH}$  (0.8 mmol, 130.7 mg) and freshly distilled acetone (2 mL) were added. The tube was evacuated and filled with  $\text{N}_2$  three times at  $-78^\circ\text{C}$  then stirred for 72 h under blue light (430 nm, 12W) in a paralleled reactor. **2a** was obtained through column chromatography ( $V_{\text{PE}}/V_{\text{EA}} = 10/1$ ) as a brown liquid (32.3 mg, 56%). **2n<sup>5</sup>** was obtained through column chromatography ( $V_{\text{PE}}/V_{\text{EA}} = 10/1$ ) as a brown liquid (mg, 59%). **<sup>1</sup>H NMR** (400 MHz,  $\text{CDCl}_3$ )  $\delta$  7.14 (t,  $J = 8.1$  Hz, 1H), 6.53 - 6.47 (m, 1H), 6.45 - 6.40 (m, 2H), 4.96 (brs, 1H), 3.79 (s, 3H). **<sup>13</sup>C NMR** (100 MHz,  $\text{CDCl}_3$ )  $\delta$  160.8, 156.6, 130.1, 107.7, 106.4, 101.4, 55.2. **IR** (neat) 1584, 1479, 1451, 1292, 1250, 1057, 747  $\text{cm}^{-1}$ . **MS** (EI)  $m/z$  124.

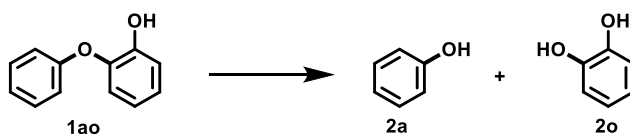

To a 25 mL Schlenk tube, 2-phenoxyphenol (0.2 mmol, 37.2 mg),  $\text{UO}_2(\text{NO}_3)_2 \cdot 6\text{H}_2\text{O}$  (4 mol%/0.008 mmol, 4 mg),  $\text{CCl}_3\text{COOH}$  (0.4 mmol, 65.4 mg) and freshly distilled acetone (2 mL) were added. The tube was evacuated and filled with  $\text{N}_2$  three times at  $-78^\circ\text{C}$  then stirred for 72 h under blue light (460nm, 9W) in a paralleled reactor. **2a** was

obtained through column chromatography ( $V_{PE}/V_{EA} = 10/1$ ) as a brown liquid (10.9 mg, 58%). **2o**<sup>11</sup> was obtained through column chromatography ( $V_{PE}/V_{EA} = 5/1$ ) as a white solid (13.4 mg, 61 %). **<sup>1</sup>H NMR** (400 MHz, CDCl<sub>3</sub>)  $\delta$  6.88 - 6.86 (m, 2H), 6.84 - 6.81 (m, 2H), 5.23 (brs, 2H). **<sup>13</sup>C NMR** (100 MHz, CDCl<sub>3</sub>)  $\delta$  143.4, 121.2, 115.4. **IR** (neat) 3450, 3327, 1513, 1470, 1364, 1282, 1256 cm<sup>-1</sup>. **MS** (EI) m/z 110.

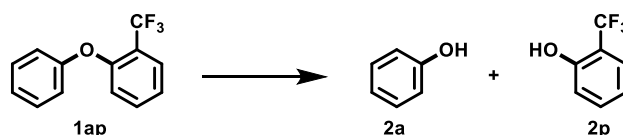

To a 25 mL Schlenk tube, 1-phenoxy-2-(trifluoromethyl)benzene (0.4 mmol, 68.0 mg), UO<sub>2</sub>(NO<sub>3</sub>)<sub>2</sub>·6H<sub>2</sub>O (4 mol%/0.016 mmol, 8 mg), CCl<sub>3</sub>COOH (0.8 mmol, 130.7 mg) and freshly distilled acetone (2 mL) were added. The tube was evacuated and filled with N<sub>2</sub> three times at -78 °C then stirred for 72 h under blue light (460nm, 9W) in a paralleled reactor. **2a** was obtained through column chromatography ( $V_{PE}/V_{EA} = 10/1$ ) as a brown liquid (22.6 mg, 60%). **2p**<sup>9</sup> was obtained through column chromatography ( $V_{PE}/V_{EA} = 10/1$ ) as a white solid (42.1 mg, 65%). **<sup>1</sup>H NMR** (400 MHz, CDCl<sub>3</sub>)  $\delta$  7.52 (d,  $J = 8.0$  Hz, 1H), 7.43 (t,  $J = 7.6$  Hz, 1H), 7.01 (t,  $J = 8.0$  Hz, 1H), 6.96 (d,  $J = 8.0$  Hz, 1H), 5.52 (brs, 1H). **<sup>13</sup>C NMR** (100 MHz, CDCl<sub>3</sub>)  $\delta$  153.4 (d,  $J = 2.0$  Hz), 133.5, 126.8 (q,  $J = 4.8$  Hz), 124.1 (q,  $J = 271.0$  Hz), 119.1 (d,  $J = 298.7$  Hz), 116.4 (q,  $J = 30.3$  Hz). **<sup>19</sup>F NMR** (376 MHz, CDCl<sub>3</sub>)  $\delta$  -60.85. **IR** (neat) 3459, 1616, 1464, 1322, 1263, 1163, 1106 cm<sup>-1</sup>. **MS** (EI) m/z 162.

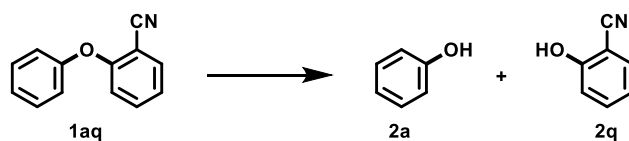

To a 25 mL Schlenk tube, 2-phenoxybenzonitrile (0.2 mmol, 39.0 mg), UO<sub>2</sub>(NO<sub>3</sub>)<sub>2</sub>·6H<sub>2</sub>O (4 mol%/0.008 mmol, 4 mg), CCl<sub>3</sub>COOH (0.4 mmol, 65.4 mg) and freshly distilled acetone (2 mL) were added. The tube was evacuated and filled with N<sub>2</sub> three times at -78 °C then stirred for 72 h under blue light (460nm, 9W) in a paralleled reactor. **2a** was obtained through column chromatography ( $V_{PE}/V_{EA} = 10/1$ ) as a brown liquid (15.0 mg, 80%). **2q**<sup>5</sup> was obtained through column chromatography ( $V_{PE}/V_{EA} =$



5/1) as a brown solid (19.2 mg, 81%).  $^1\text{H NMR}$  (400 MHz,  $\text{CDCl}_3$ )  $\delta$  7.52 - 7.45 (m, 2H), 7.02 - 6.97 (m, 2H), 6.67 (brs, 1H).  $^{13}\text{C NMR}$  (100 MHz,  $\text{CDCl}_3$ )  $\delta$  158.7, 134.7, 132.9, 120.8, 116.6, 116.3, 99.3. **IR** (neat) 3262, 2229, 1603, 1503, 1234, 1160, 1100  $\text{cm}^{-1}$ . **MS** (EI)  $m/z$  119.

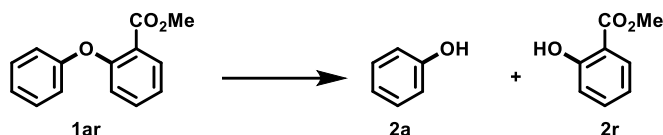

To a 25 mL Schlenk tube, methyl 2-phenoxybenzoate (0.4 mmol, 91.2mg),  $\text{UO}_2(\text{NO}_3)_2 \cdot 6\text{H}_2\text{O}$  (4 mol%/0.016 mmol, 8 mg),  $\text{CCl}_3\text{COOH}$  (0.8 mmol, 130.7 mg) and freshly distilled acetone (2 mL) were added. The tube was evacuated and filled with  $\text{N}_2$  three times at  $-78^\circ\text{C}$  then stirred for 72 h under blue light (430 nm, 12 W) in a paralleled reactor. **2a** was obtained through column chromatography ( $V_{\text{PE}}/V_{\text{EA}} = 10/1$ ) as a brown liquid (30.5 mg, 81%). **2r**<sup>10</sup> was obtained through column chromatography ( $V_{\text{PE}}/V_{\text{EA}} = 5/1$ ) as a yellow liquid (55.9 mg, 92%).  $^1\text{H NMR}$  (400 MHz,  $\text{CDCl}_3$ )  $\delta$  10.77 (brs, 1H), 7.84 (dd,  $J = 8.0, 1.7$  Hz, 1H), 7.48 - 7.44 (m, 1H), 6.98 (d,  $J = 8.4$  Hz, 1H), 6.90 - 6.86 (m, 1H), 3.95 (s, 3H).  $^{13}\text{C NMR}$  (100 MHz,  $\text{CDCl}_3$ )  $\delta$  170.5, 161.5, 135.6, 129.8, 119.1, 117.5, 112.3, 52.2. **IR** (neat) 1674, 1614, 1485, 1438, 1301, 1089, 848  $\text{cm}^{-1}$ . **MS** (EI)  $m/z$  152.

**Flow reaction:** To a 250 mL three-necked flask, a solution of methyl 2-phenoxybenzoate (10.0 mmol, 2.28 g),  $\text{UO}_2(\text{NO}_3)_2 \cdot 6\text{H}_2\text{O}$  (4 mol%/0.4 mmol, 201 mg) and  $\text{CCl}_3\text{COOH}$  (20.0 mmol, 3.26 g) in freshly-distilled acetone (50 mL) was added. The flask was equipped with rubber plugs, with inlet and outlet of micro tube, which was made of PTFE tubing (O.D. = 2 mm, I.D. = 1 mm, length = 5.68 m, volume = 4.45 mL). Then the flask along with the micro cube were evacuated and filled with  $\text{N}_2$  three times at  $-78^\circ\text{C}$ . The solution was pumped by a pump (0.5 mL/min) into the micro tube, then returned to flask. This circulatory system was irradiated by blue light (430 nm, 54 W totally) for 48 h (the temperature was below  $30^\circ\text{C}$ ). After the reaction, acetone (10 mL) was pumped into the tube to flush out residual fluid. The solvent was removed in

vacuo. **2a** was obtained through column chromatography ( $V_{PE}/V_{EA} = 10/1$ ) as a brown liquid (0.67 g, 71%). **2r** was obtained through column chromatography ( $V_{PE}/V_{EA} = 5/1$ ) as a yellow liquid (1.09 g, 72%).

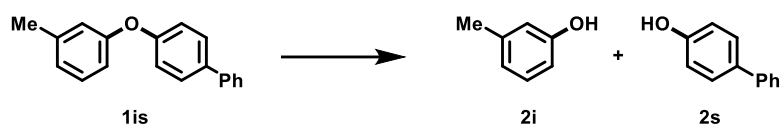

To a 25 mL Schlenk tube, 4-(m-tolyloxy)-1,1'-biphenyl (0.2 mmol, 52.0 mg),  $UO_2(NO_3)_2 \cdot 6H_2O$  (4 mol%/0.008 mmol, 4 mg),  $CCl_3COOH$  (0.4 mmol, 65.3 mg) and freshly distilled acetone (2 mL) were added. The tube was evacuated and filled with  $N_2$  three times at  $-78^\circ C$  then stirred for 48 h under blue light (460 nm, 9 W) in a paralleled reactor. **2i** was obtained through column chromatography ( $V_{PE}/V_{EA} = 10/1$ ) as a pink liquid (16.4 mg, 76%). **2s** was obtained through column chromatography ( $V_{PE}/V_{EA} = 5/1$ ) as a yellow solid (27.8 mg, 82%).  **$^1H$  NMR** (400 MHz,  $CDCl_3$ )  $\delta$  7.58 – 7.52 (m, 2H), 7.49 (d,  $J = 8.7$  Hz, 2H), 7.42 (t,  $J = 7.6$  Hz, 2H), 7.31 (t,  $J = 7.3$  Hz, 1H), 6.91 (d,  $J = 8.7$  Hz, 2H), 4.83 (s, 1H).  **$^{13}C$  NMR** (100 MHz,  $CDCl_3$ )  $\delta$  155.0, 140.7, 134.0, 128.7, 128.3, 126.7, 115.6. **IR** (neat) 1739, 1711, 1597, 1488, 1373, 1239, 832  $cm^{-1}$ . **MS** (EI)  $m/z$  170.

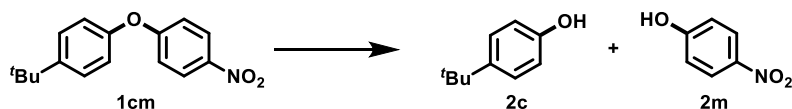

To a 25 mL Schlenk tube, 1-(tert-butyl)-4-(4-nitrophenoxy)benzene (0.4 mmol, 108.4 mg),  $UO_2(NO_3)_2 \cdot 6H_2O$  (4 mol%/0.016 mmol, 8 mg),  $CCl_3COOH$  (0.8 mmol, 130.7 mg) and freshly distilled acetone (2 mL) were added. The tube was evacuated and filled with  $N_2$  three times at  $-78^\circ C$  then stirred for 72 h under blue light (430 nm, 12 W) in a paralleled reactor. **2c** was obtained through column chromatography ( $V_{PE}/V_{EA} = 10/1$ ) as a white solid (39.0 mg, 65%). **2m** was obtained through column chromatography ( $V_{PE}/V_{EA} = 5/1$ ) as a yellow solid (28.3 mg, 51%).

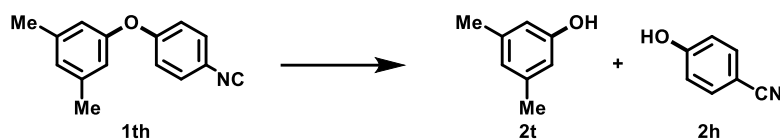

To a 25 mL Schlenk tube, 4-(3,5-dimethylphenoxy)benzonitrile (0.4 mmol, 89.2 mg),  $\text{UO}_2(\text{NO}_3)_2 \cdot 6\text{H}_2\text{O}$  (4 mol%/0.016 mmol, 8 mg),  $\text{CCl}_3\text{COOH}$  (0.8 mmol, 130.7 mg) and freshly distilled acetone (2 mL) were added. The tube was evacuated and filled with  $\text{N}_2$  three times at  $-78^\circ\text{C}$  then stirred for 72 h under blue light (430 nm, 12 W) in a paralleled reactor. **2h** was obtained through column chromatography ( $V_{\text{PE}}/V_{\text{EA}} = 5/1$ ) as a white solid (43.3 mg, 91%). **2t**<sup>5</sup> was obtained through column chromatography ( $V_{\text{PE}}/V_{\text{EA}} = 10/1$ ) as a brown solid (23.9 mg, 49%). <sup>1</sup>H NMR (400 MHz,  $\text{CDCl}_3$ )  $\delta$  6.58 (s, 1H), 6.46 (s, 2H), 4.63 (brs, 1H), 2.27 (s, 6H). <sup>13</sup>C NMR (100 MHz,  $\text{CDCl}_3$ )  $\delta$  155.3, 139.5, 122.5, 112.9, 21.2. IR (neat) 3269, 2920, 1632, 1598, 1312, 1158, 835,  $\text{cm}^{-1}$ . MS (EI)  $m/z$  122.

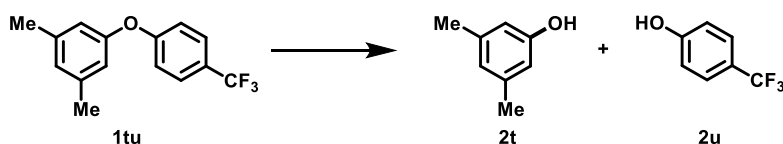

To a 25 mL Schlenk tube, 1,3-dimethyl-5-(4-(trifluoromethyl)phenoxy)benzene (0.4 mmol, 106.0 mg),  $\text{UO}_2(\text{NO}_3)_2 \cdot 6\text{H}_2\text{O}$  (4 mol%/0.016 mmol, 8 mg),  $\text{CCl}_3\text{COOH}$  (0.8 mmol, 130.7 mg) and freshly distilled acetone (2 mL) were added. The tube was evacuated and filled with  $\text{N}_2$  three times at  $-78^\circ\text{C}$  then stirred for 72 h under blue light (430 nm, 12 W) in a paralleled reactor. **2t** was obtained through column chromatography ( $V_{\text{PE}}/V_{\text{EA}} = 20/1$ ) as a brown solid (19.0 mg, 39%). **2u**<sup>13</sup> was obtained through column chromatography ( $V_{\text{PE}}/V_{\text{EA}} = 10/1$ ) as a brown solid (46.7 mg, 72%). <sup>1</sup>H NMR (400 MHz,  $\text{CDCl}_3$ )  $\delta$  7.51 (d,  $J = 12.0$  Hz, 2H), 6.91 (d,  $J = 8.0$  Hz, 2H), 5.66 (brs, 1H). <sup>13</sup>C NMR (100 MHz,  $\text{CDCl}_3$ )  $\delta$  158.0, 127.2 (q,  $J = 3.7$  Hz), 124.3 (q,  $J = 269.0$  Hz), 123.3 (q,  $J = 32.8$  Hz), 115.4. <sup>19</sup>F NMR (376 MHz,  $\text{CDCl}_3$ )  $\delta$  -61.54. IR (neat) 3357, 1617, 1604, 1522, 1319, 1247, 1158  $\text{cm}^{-1}$ . MS (EI)  $m/z$  162.

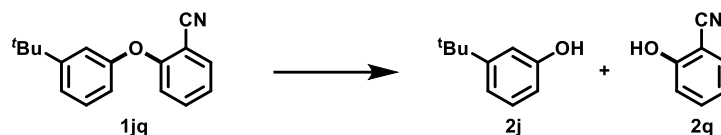

To a 25 mL Schlenk tube, 2-(3-(tert-butyl)phenoxy)benzonitrile (0.4 mmol, 100.4 mg),  $\text{UO}_2(\text{NO}_3)_2 \cdot 6\text{H}_2\text{O}$  (4 mol%/0.016 mmol, 8 mg),  $\text{CCl}_3\text{COOH}$  (0.8 mmol, 130.7 mg) and freshly distilled acetone (2 mL) were added. The tube was evacuated and filled with  $\text{N}_2$  three times at  $-78^\circ\text{C}$  then stirred for 72 h under blue light (460nm, 9W) in a paralleled reactor. **2j** was obtained through column chromatography ( $V_{\text{PE}}/V_{\text{EA}} = 10/1$ ) as a white solid (44.4 mg, 74%). **2q** was obtained through column chromatography ( $V_{\text{PE}}/V_{\text{EA}} = 5/1$ ) as a brown solid (43.4 mg, 92%).

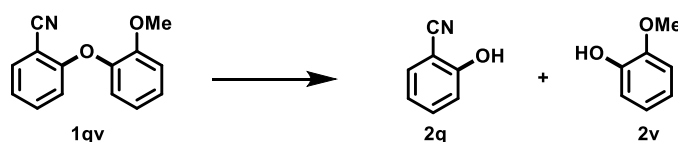

To a 25 mL Schlenk tube, 2-(2-methoxyphenoxy)benzonitrile (0.4 mmol, 90.0 mg),  $\text{UO}_2(\text{NO}_3)_2 \cdot 6\text{H}_2\text{O}$  (4 mol%/0.016 mmol, 8 mg),  $\text{CCl}_3\text{COOH}$  (0.8 mmol, 130.7 mg) and freshly distilled acetone (2 mL) were added. The tube was evacuated and filled with  $\text{N}_2$  three times at  $-78^\circ\text{C}$  then stirred for 72 h under blue light (460nm, 9W) in a paralleled reactor. **2q** was obtained through column chromatography ( $V_{\text{PE}}/V_{\text{EA}} = 10/1$ ) as a brown solid (30.2 mg, 64%). **2v**<sup>8</sup> was obtained through column chromatography ( $V_{\text{PE}}/V_{\text{EA}} = 50/1$ ) as a brown liquid (19.2 mg, 39%). **<sup>1</sup>H NMR** (400 MHz,  $\text{CDCl}_3$ )  $\delta$  6.95 - 6.91 (m, 1H), 6.90 - 6.83 (m, 3H), 5.65 (brs, 1H), 3.89 (s, 3H). **<sup>13</sup>C NMR** (100 MHz,  $\text{CDCl}_3$ )  $\delta$  146.5, 145.5, 121.3, 120.0, 114.4, 110.6, 55.7. **IR** (neat) 3510, 3449, 2932, 2842, 1596, 1499, 1443  $\text{cm}^{-1}$ . **MS** (EI)  $m/z$  124.

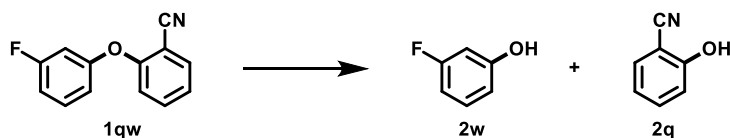

To a 25 mL Schlenk tube, 2-(3-fluorophenoxy)benzonitrile (0.2 mmol, 42.6 mg),  $\text{UO}_2(\text{NO}_3)_2 \cdot 6\text{H}_2\text{O}$  (4 mol%/0.008 mmol, 4 mg),  $\text{CCl}_3\text{COOH}$  (0.4 mmol, 65.4 mg) and

freshly distilled acetone (2 mL) were added. The tube was evacuated and filled with N<sub>2</sub> three times at -78 °C then stirred for 72 h under blue light (460nm, 9W) in a paralleled reactor. **2q** was obtained through column chromatography (V<sub>PE</sub>/V<sub>EA</sub> = 10/1) as a brown solid (27.4 mg, 88%). **2w**<sup>8</sup> was obtained through column chromatography (V<sub>PE</sub>/V<sub>EA</sub> = 40/1) as a brown liquid (15.0 mg, 67 %). <sup>1</sup>H NMR (400 MHz, CDCl<sub>3</sub>) δ 7.22 - 7.16 (m, 1H), 6.65 - 6.59 (m, 3H), 5.95 (brs, 1H). <sup>13</sup>C NMR (100 MHz, CDCl<sub>3</sub>) δ 164.7, 162.3, 156.5 (d, *J* = 11.3 Hz), 130.5 (d, *J* = 10.1 Hz), 111.1 (d, *J* = 2.9 Hz), 107.8 (d, *J* = 21.3 Hz), 103.2 (d, *J* = 24.6 Hz). <sup>19</sup>F NMR (376 MHz, CDCl<sub>3</sub>) δ -111.57. IR (neat) 3374, 1609, 1490, 1460, 1282, 1160, 1129 cm<sup>-1</sup>. MS (EI) m/z 112.

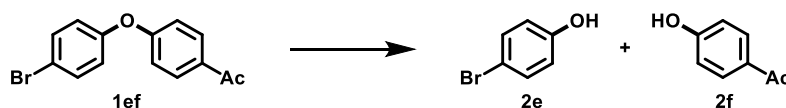

To a 25 mL Schlenk tube, 1-(4-(4-bromophenoxy)phenyl)ethan-1-one (0.4 mmol, 116.0 mg), UO<sub>2</sub>(NO<sub>3</sub>)<sub>2</sub>·6H<sub>2</sub>O (4 mol%/0.016 mmol, 8 mg), CCl<sub>3</sub>COOH (0.8 mmol, 130.7 mg) and freshly distilled acetone (2 mL) were added. The tube was evacuated and filled with N<sub>2</sub> three times at -78 °C then stirred for 72 h under blue light (430 nm, 12W) in a paralleled reactor. **2e** was obtained through column chromatography (V<sub>PE</sub>/V<sub>EA</sub> = 10/1) as a brown liquid (49.2 mg, 72%). **2f** was obtained through column chromatography (V<sub>PE</sub>/V<sub>EA</sub> = 5/1) as a brown solid (44.6 mg, 82%).

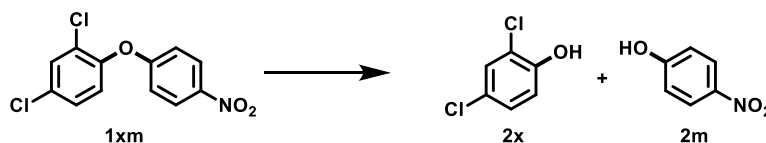

To a 25 mL Schlenk tube, nitrofen (0.4 mmol, 113.6 mg), UO<sub>2</sub>(NO<sub>3</sub>)<sub>2</sub>·6H<sub>2</sub>O (4 mol%/0.016 mmol, 8 mg), CCl<sub>3</sub>COOH (0.8 mmol, 130.7 mg) and freshly distilled acetone (2 mL) were added. The tube was evacuated and filled with N<sub>2</sub> three times at -78 °C then stirred for 72 h under blue light (430 nm, 12W) in a paralleled reactor. **2m** was obtained through column chromatography (V<sub>PE</sub>/V<sub>EA</sub> = 10/1) as a yellow solid (35.0 mg, 54%). **2x**<sup>14</sup> was obtained through column chromatography (V<sub>PE</sub>/V<sub>EA</sub> = 30/1) as a

white solid (28.4 mg, 51%). **<sup>1</sup>H NMR** (400 MHz, CDCl<sub>3</sub>) δ 7.33 (d, *J* = 4.0 Hz, 1H), 7.17 - 7.14 (m, 1H), 6.95 (d, *J* = 8.0 Hz, 1H), 5.53 (brs, 1H). **<sup>13</sup>C NMR** (100 MHz, CDCl<sub>3</sub>) δ 150.1, 128.5, 128.5, 125.5, 120.3, 117.1. **IR** (neat) 3426, 1477, 1406, 1328, 1276, 1184, 1094 cm<sup>-1</sup>. **MS** (EI) *m/z* 162.

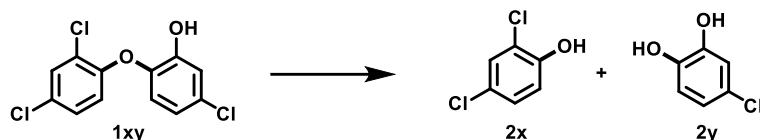

To a 25 mL Schlenk tube, triclosan (0.4 mmol, 115.8 mg), UO<sub>2</sub>(NO<sub>3</sub>)<sub>2</sub>·6H<sub>2</sub>O (4 mol%/0.016 mmol, 8 mg), CCl<sub>3</sub>COOH (0.8 mmol, 130.7 mg) and freshly distilled acetone (2 mL) were added. The tube was evacuated and filled with N<sub>2</sub> three times at -78 °C then stirred for 72 h under blue light (430 nm, 12W) in a paralleled reactor. **2x** was obtained through column chromatography (*V*<sub>PE</sub>/*V*<sub>EA</sub> = 20/1) as a white solid (38.2 mg, 59%). **2y**<sup>15</sup> was obtained through column chromatography (*V*<sub>PE</sub>/*V*<sub>EA</sub> = 5/1) as a brown solid (32.3 mg, 56%). **<sup>1</sup>H NMR** (400 MHz, CDCl<sub>3</sub>) δ 6.89 - 6.84 (m, 2H), 6.78 (t, *J* = 8.0 Hz, 1H), 5.56 (brs, 1H), 5.54 (brs, 1H). **<sup>13</sup>C NMR** (100 MHz, CDCl<sub>3</sub>) δ 144.7, 139.2, 121.2, 120.4, 119.7, 114.2. **IR** (neat) 3409, 2925, 1596, 1490, 1464, 1326, 1158 cm<sup>-1</sup>. **MS** (EI) *m/z* 144.

**Flow reaction:** To a 250 mL three-necked flask, a solution of triclosan (10.0 mmol, 2.88 g), UO<sub>2</sub>(NO<sub>3</sub>)<sub>2</sub>·6H<sub>2</sub>O (4 mol%/0.4 mmol, 201 mg) and CCl<sub>3</sub>COOH (20.0 mmol, 3.26 g) in freshly-distilled acetone (50 mL) was added. The flask was equipped with rubber plugs, with inlet and outlet of micro tube, which was made of PTFE tubing (O.D. = 2 mm, I.D. = 1 mm, length = 5.68 m, volume = 4.45 mL). Then the flask along with the micro cube were evacuated and filled with N<sub>2</sub> three times at -78 °C. The solution was pumped by a pump (0.5 mL/min) into the micro tube, then returned to flask. This circulatory system was irradiated by blue light (430 nm, 54 W) for 48 h (the temperature was below 30 °C). After the reaction, acetone (10 mL) was pumped into the tube to flush out residual fluid. The solvent was removed in vacuo. **2x** was obtained through

column chromatography ( $V_{PE}/V_{EA} = 20/1$ ) as a white solid (0.91g, 56%). **2y** was obtained through column chromatography ( $V_{PE}/V_{EA} = 5/1$ ) as a brown solid (0.69 mg, 48%).

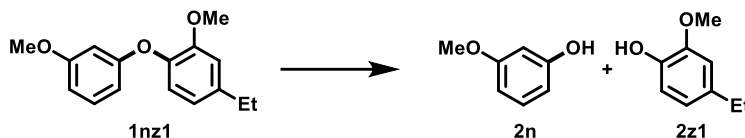

To a 25 mL Schlenk tube, **1nz1** (0.4 mmol, 103.2 mg),  $UO_2(NO_3)_2 \cdot 6H_2O$  (4 mol%/0.016 mmol, 8 mg),  $CCl_3COOH$  (0.8 mmol, 130.7 mg) and freshly distilled acetone (2 mL) were added. The tube was evacuated and filled with  $N_2$  three times at  $-78^\circ C$  then stirred for 72 h under blue light (430 nm, 12 W) in a paralleled reactor. **2n** was obtained through column chromatography ( $V_{PE}/V_{EA} = 20/1$ ) (23.8 mg, 48%) as a brown liquid. **2z1**<sup>16</sup> was obtained through column chromatography ( $V_{PE}/V_{EA} = 5/1$ ) (32.8 mg, 54%) as a brown liquid. <sup>1</sup>H NMR (400 MHz,  $CDCl_3$ )  $\delta$  6.85 (d,  $J = 8.4$  Hz, 1H), 6.70 (d,  $J = 7.2$  Hz, 2H), 5.48 (brs, 1H), 3.89 (s, 3H), 2.59 (q,  $J = 7.6$  Hz, 2H), 1.23 (t,  $J = 7.6$  Hz, 3H). <sup>13</sup>C NMR (100 MHz,  $CDCl_3$ )  $\delta$  146.2, 143.4, 136.2, 120.2, 114.1, 110.4, 55.8, 28.5, 15.9. IR (neat) 1598, 1287, 1198, 1149, 1041, 945, 686  $cm^{-1}$ . MS (EI)  $m/z$  152.

**Flow reaction:** To a 250 mL three-necked flask, a solution of **1nz1** (10.0 mmol, 2.58 g),  $UO_2(NO_3)_2 \cdot 6H_2O$  (4 mol%/0.4 mmol, 201 mg) and  $CCl_3COOH$  (20.0 mmol, 3.26 g) in freshly-distilled acetone (50 mL) was added. The flask was equipped with rubber plugs, with inlet and outlet of micro tube, which was made of PTFE tubing (O.D. = 2 mm, I.D. = 1 mm, length = 5.68 m, volume = 4.45 mL). Then the flask along with the micro cube were evacuated and filled with  $N_2$  three times at  $-78^\circ C$ . The solution was pumped by a pump (0.5 mL/min) into the micro tube, then returned to flask. This circulatory system was irradiated by blue LEDs (430 nm, 54 W totally) for 48 h (the temperature was below  $30^\circ C$ ). After the reaction, acetone (10 mL) was pumped into the tube to flush out residual fluid. The solvent was removed in vacuo. **2n** was obtained through column chromatography ( $V_{PE}/V_{EA} = 20/1$ ) as a brown liquid (0.47 g, 65%). **2z1** was obtained through column chromatography ( $V_{PE}/V_{EA} = 5/1$ ) as a brown liquid (0.71

g, 81%) based on starting material recovery.

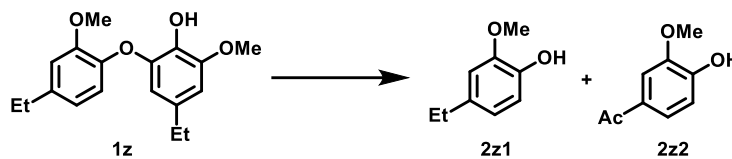

To a 25 mL Schlenk tube, **1z** (0.4 mmol, 120.8 mg),  $\text{UO}_2(\text{NO}_3)_2 \cdot 6\text{H}_2\text{O}$  (4 mol%/0.016 mmol, 8 mg),  $\text{CCl}_3\text{COOH}$  (0.8 mmol, 130.7 mg) and freshly distilled acetone (2 mL) were added. The tube was evacuated and filled with  $\text{N}_2$  three times at  $-78^\circ\text{C}$  then stirred for 72 h under blue light (430 nm, 12 W) in a paralleled reactor. **2z1** was obtained through column chromatography ( $V_{\text{PE}}/V_{\text{EA}} = 5/1$ ) as a brown liquid (8.5 mg, 14%). **2z2**<sup>17</sup> was obtained through column chromatography ( $V_{\text{PE}}/V_{\text{EA}} = 2/1$ ) as a brown liquid (14.6 mg, 22%). <sup>1</sup>H NMR (400 MHz,  $\text{CDCl}_3$ )  $\delta$  7.55-7.52 (m, 2H), 6.95 (d,  $J = 8.0$  Hz, 1H), 6.13 (brs, 1H), 3.95 (s, 3H), 2.55 (s, 3H). <sup>13</sup>C NMR (100 MHz,  $\text{CDCl}_3$ )  $\delta$  196.9, 150.4, 146.6, 130.0, 123.9, 113.8, 109.7, 55.9, 26.0. IR (neat) 3324, 1659, 1577, 1518, 1292, 1222, 851  $\text{cm}^{-1}$ . MS (EI)  $m/z$  166.



## V. NMR Spectra

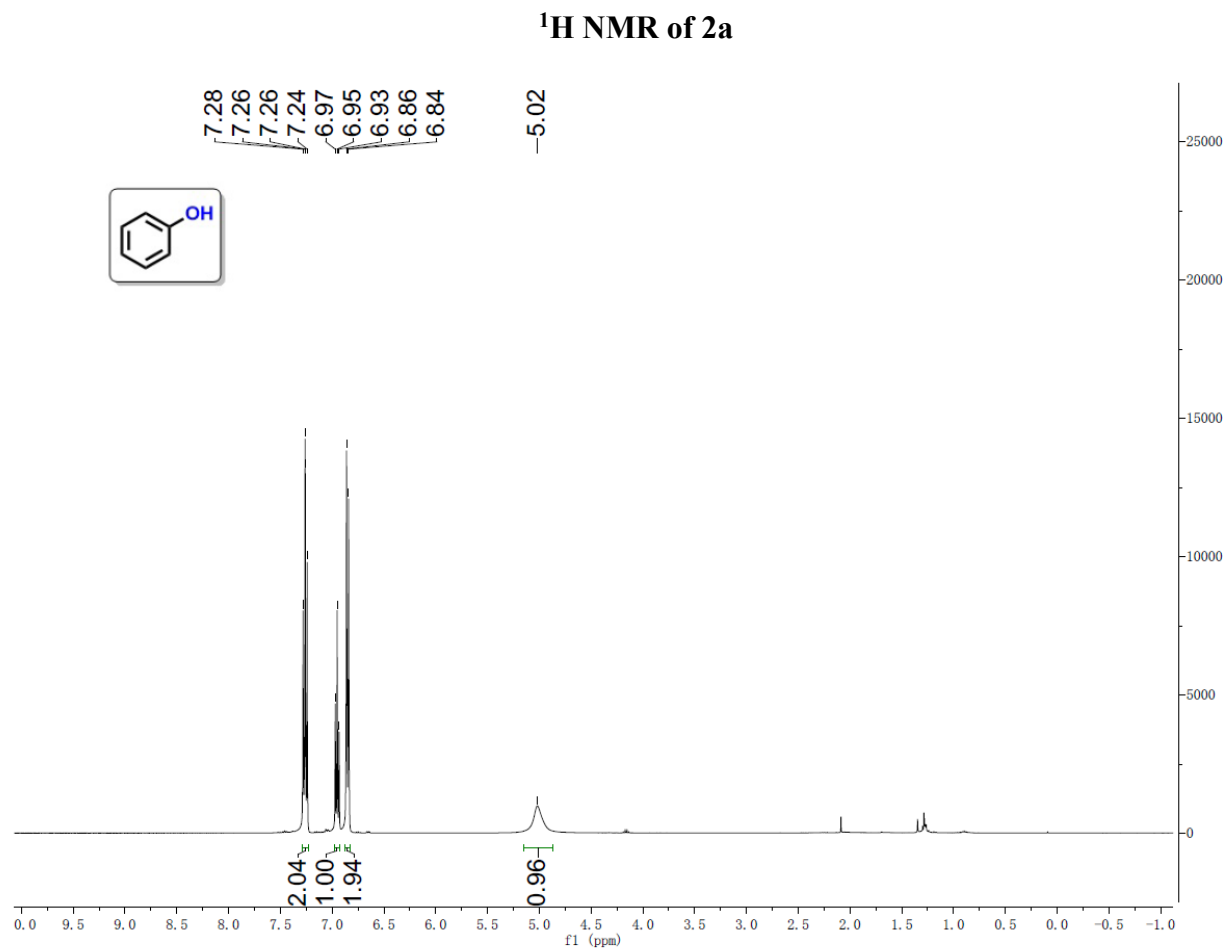

<sup>13</sup>C NMR of 2a

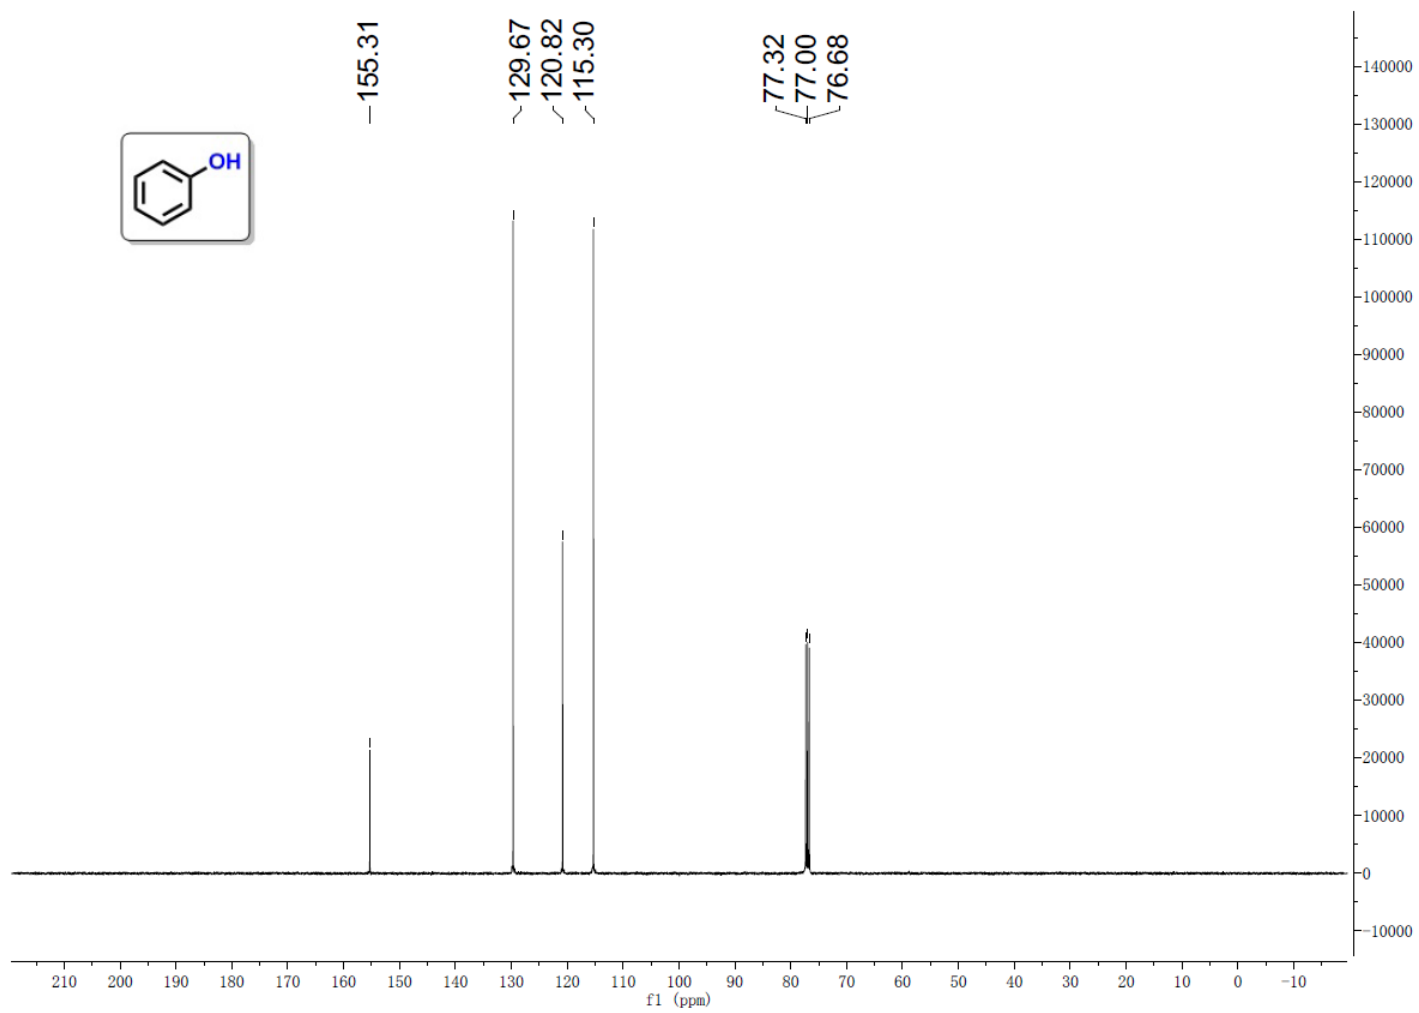

### <sup>1</sup>H NMR of 2b

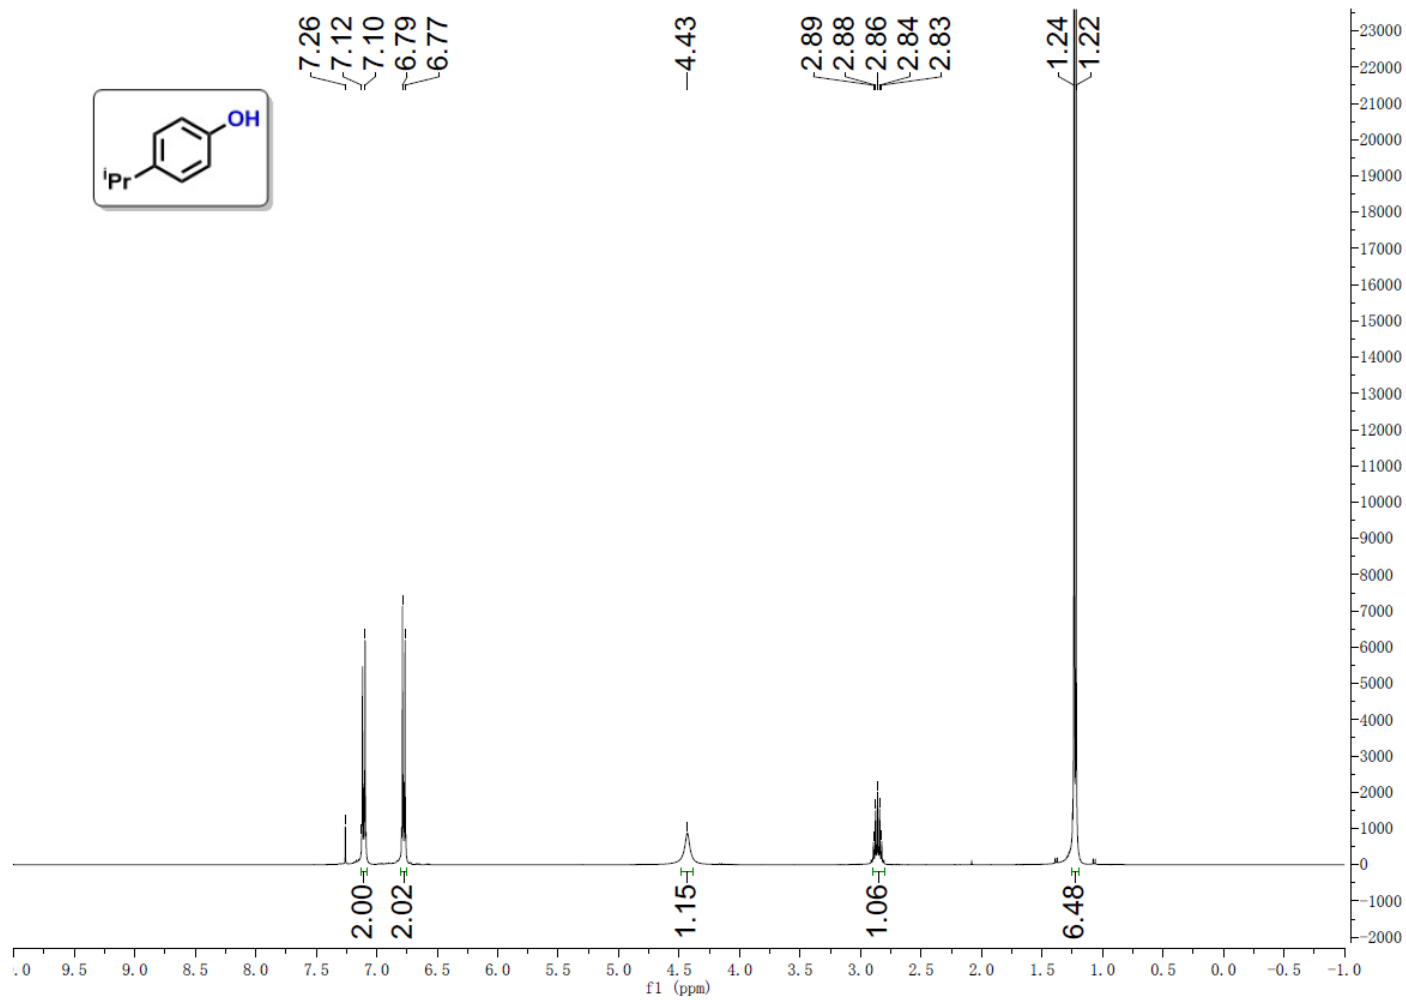

<sup>13</sup>C NMR of 2b

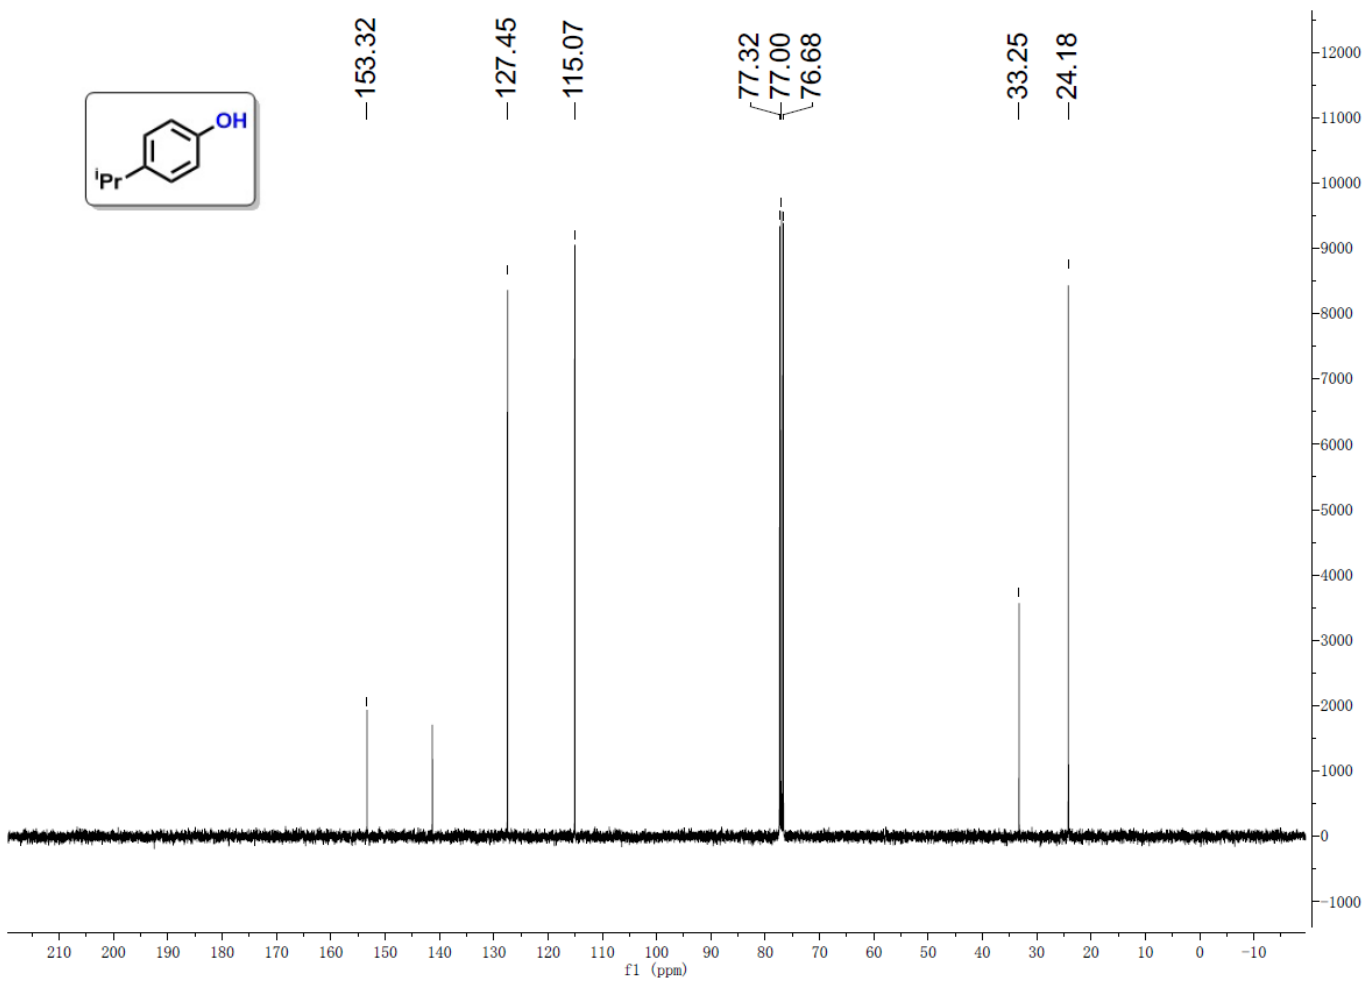

# <sup>1</sup>H NMR of 2c

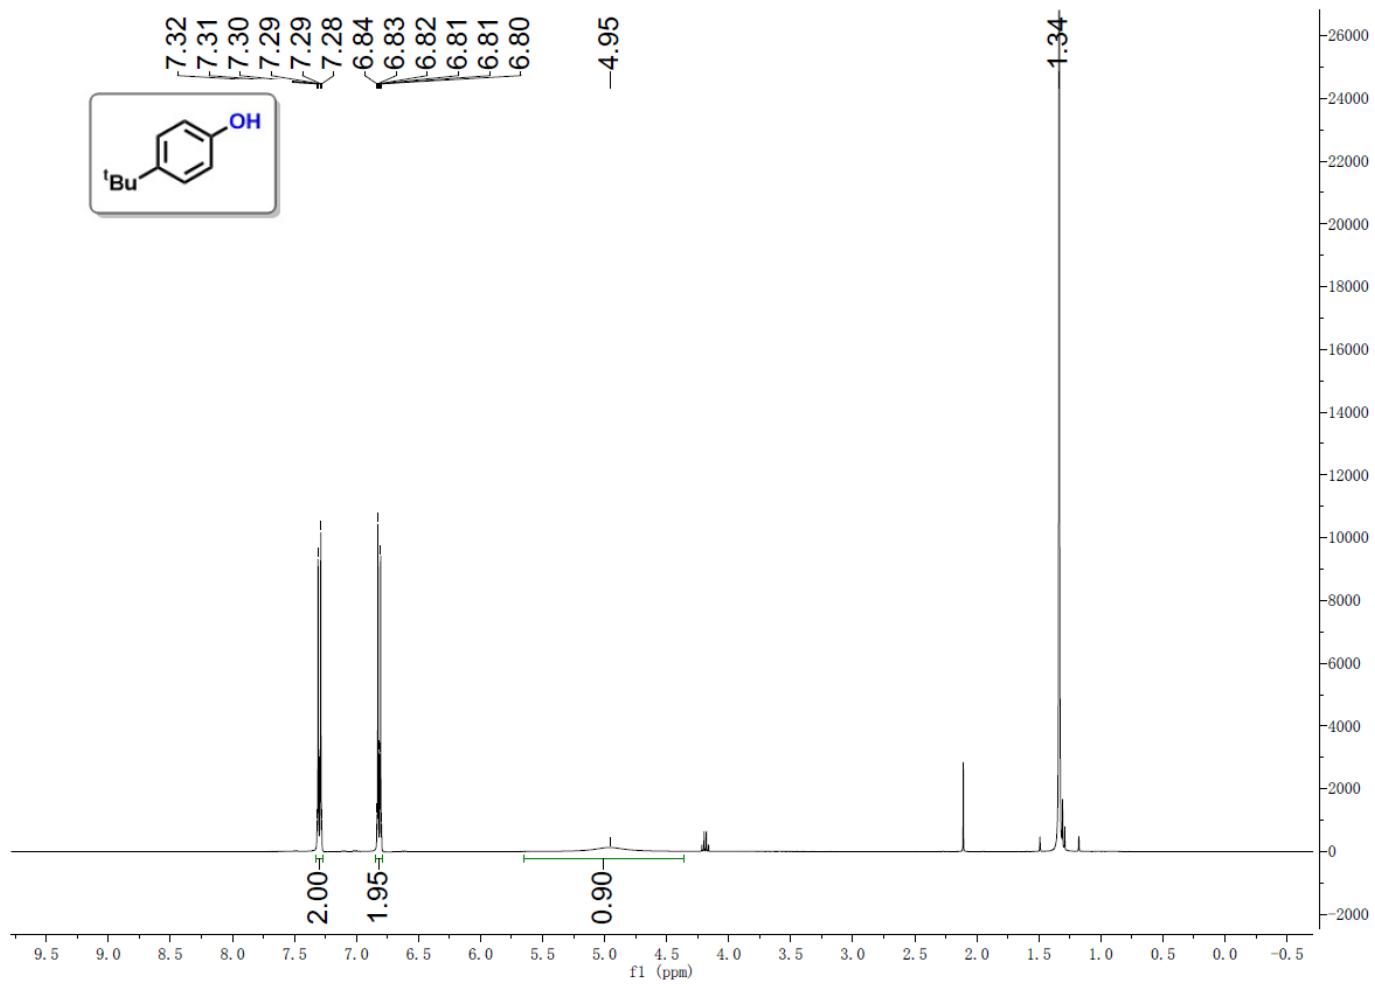

<sup>13</sup>C NMR of 2c

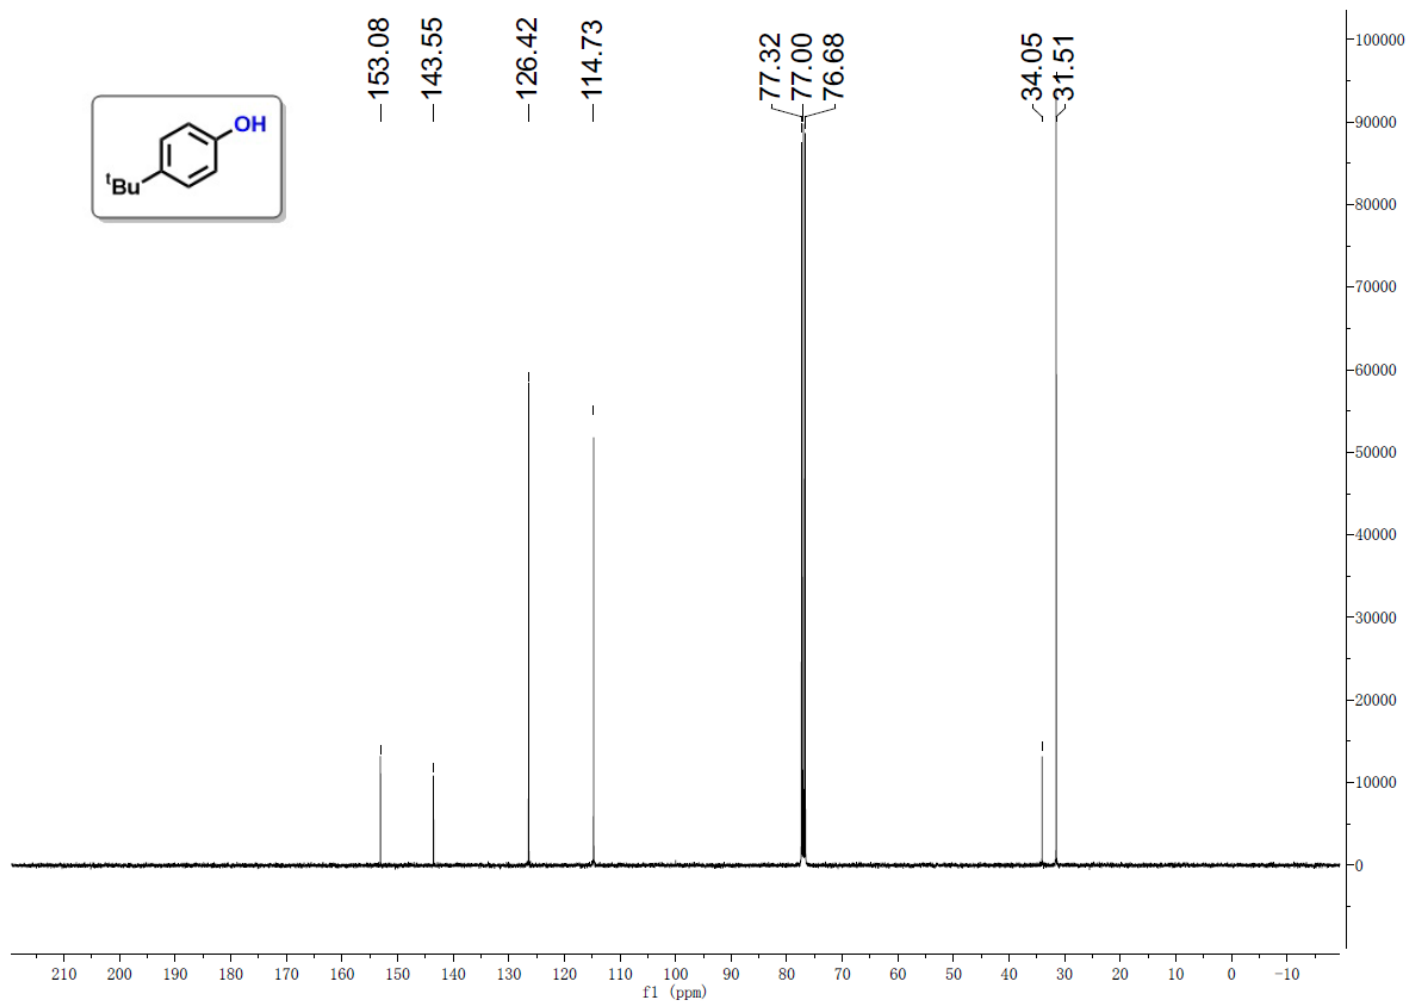

# <sup>1</sup>H NMR of 2d

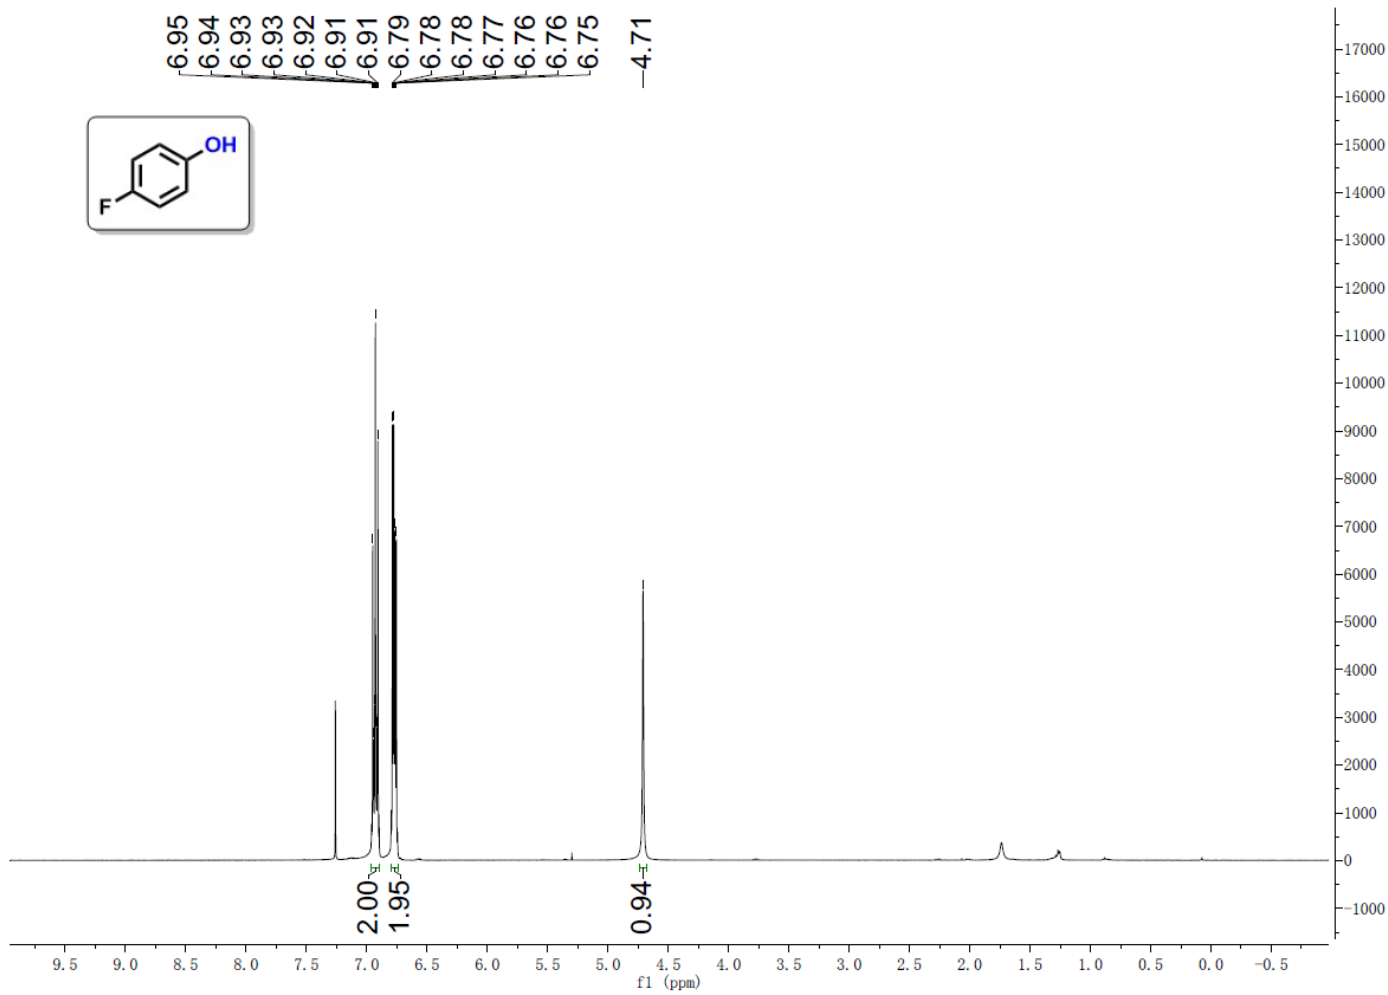

### <sup>13</sup>C NMR of 2d

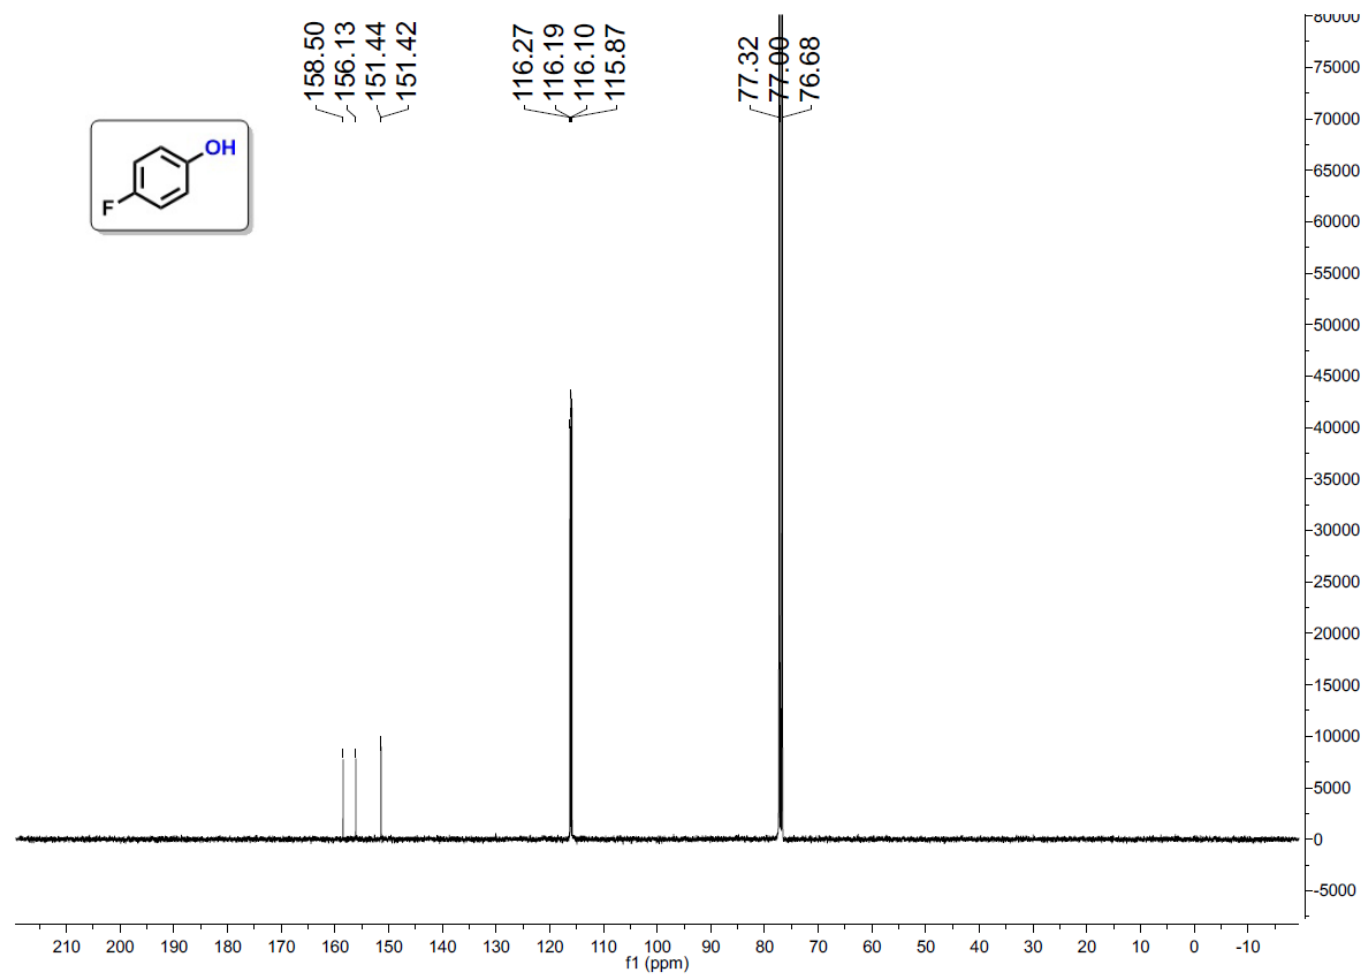



**<sup>19</sup>F NMR of 2d**

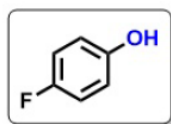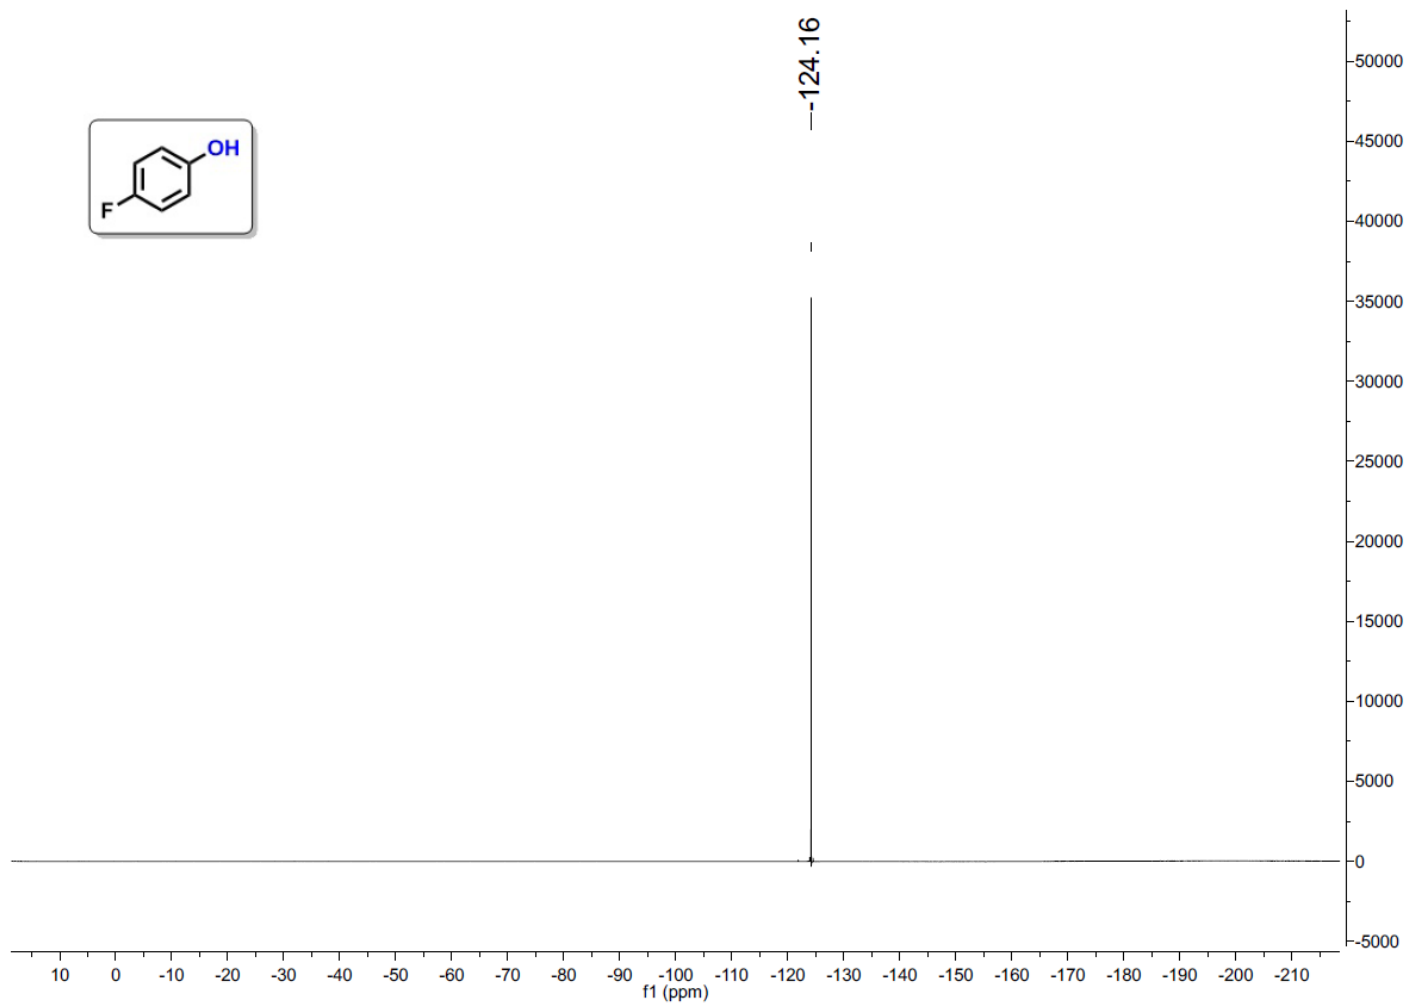

# <sup>1</sup>H NMR of 2e

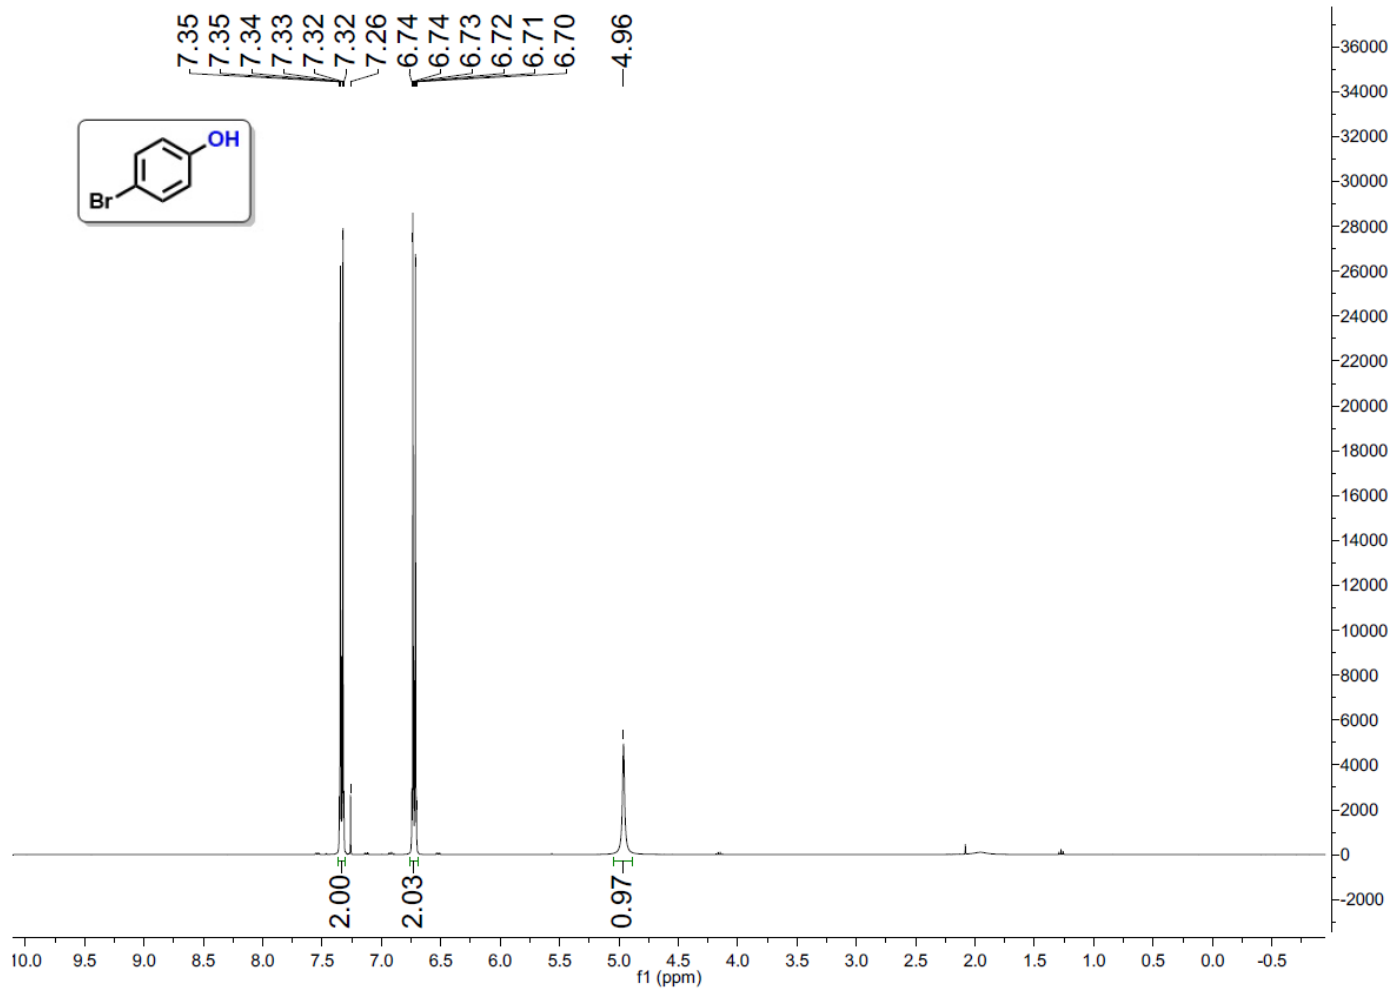

<sup>13</sup>C NMR of 2e

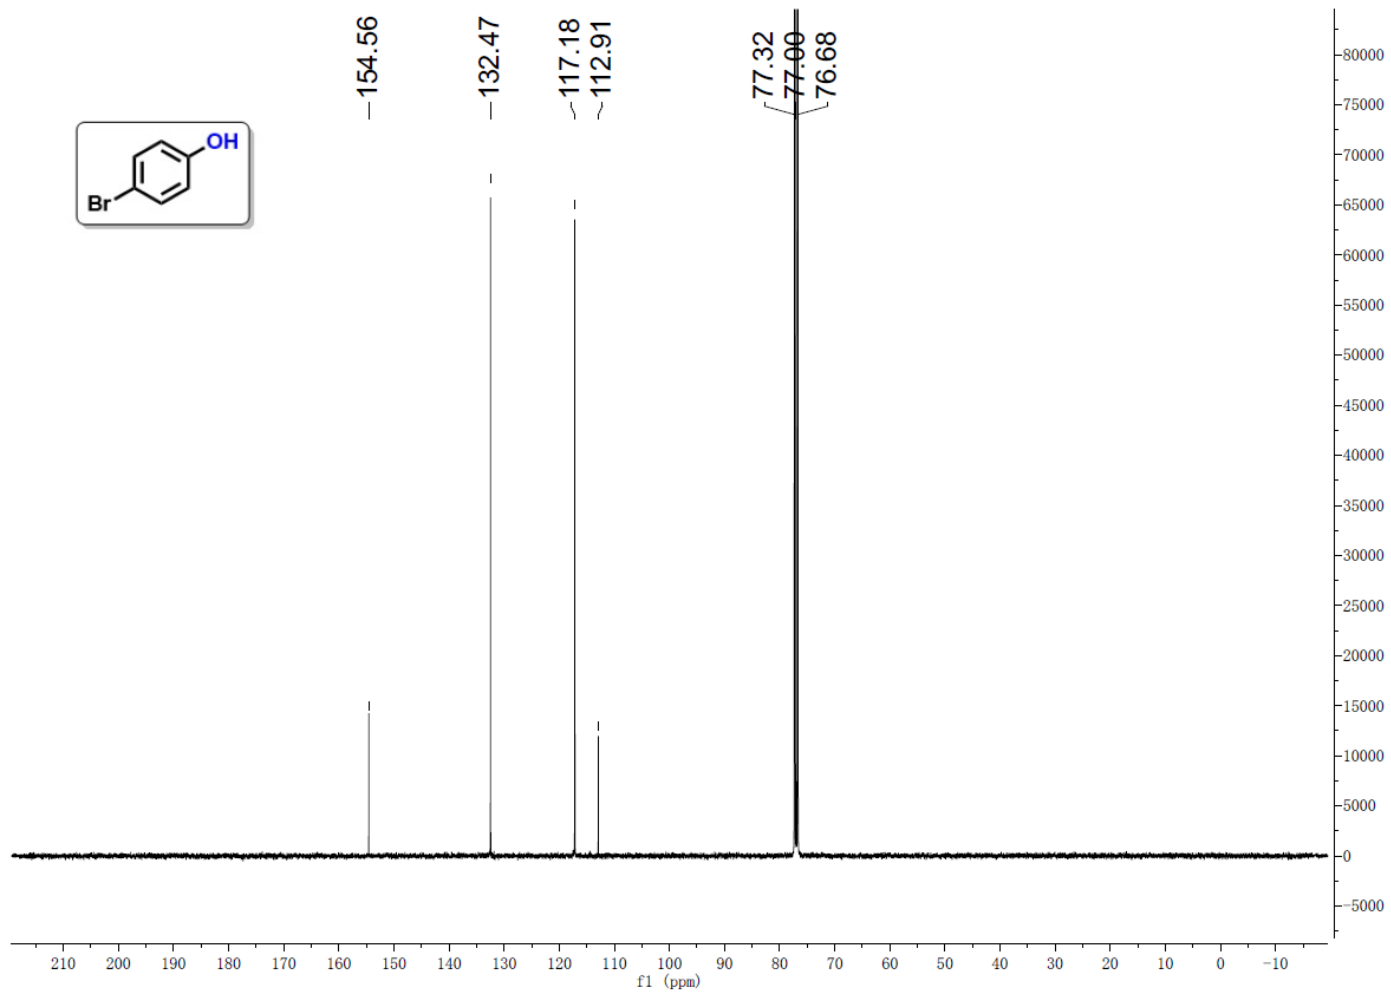

# <sup>1</sup>H NMR of 2f

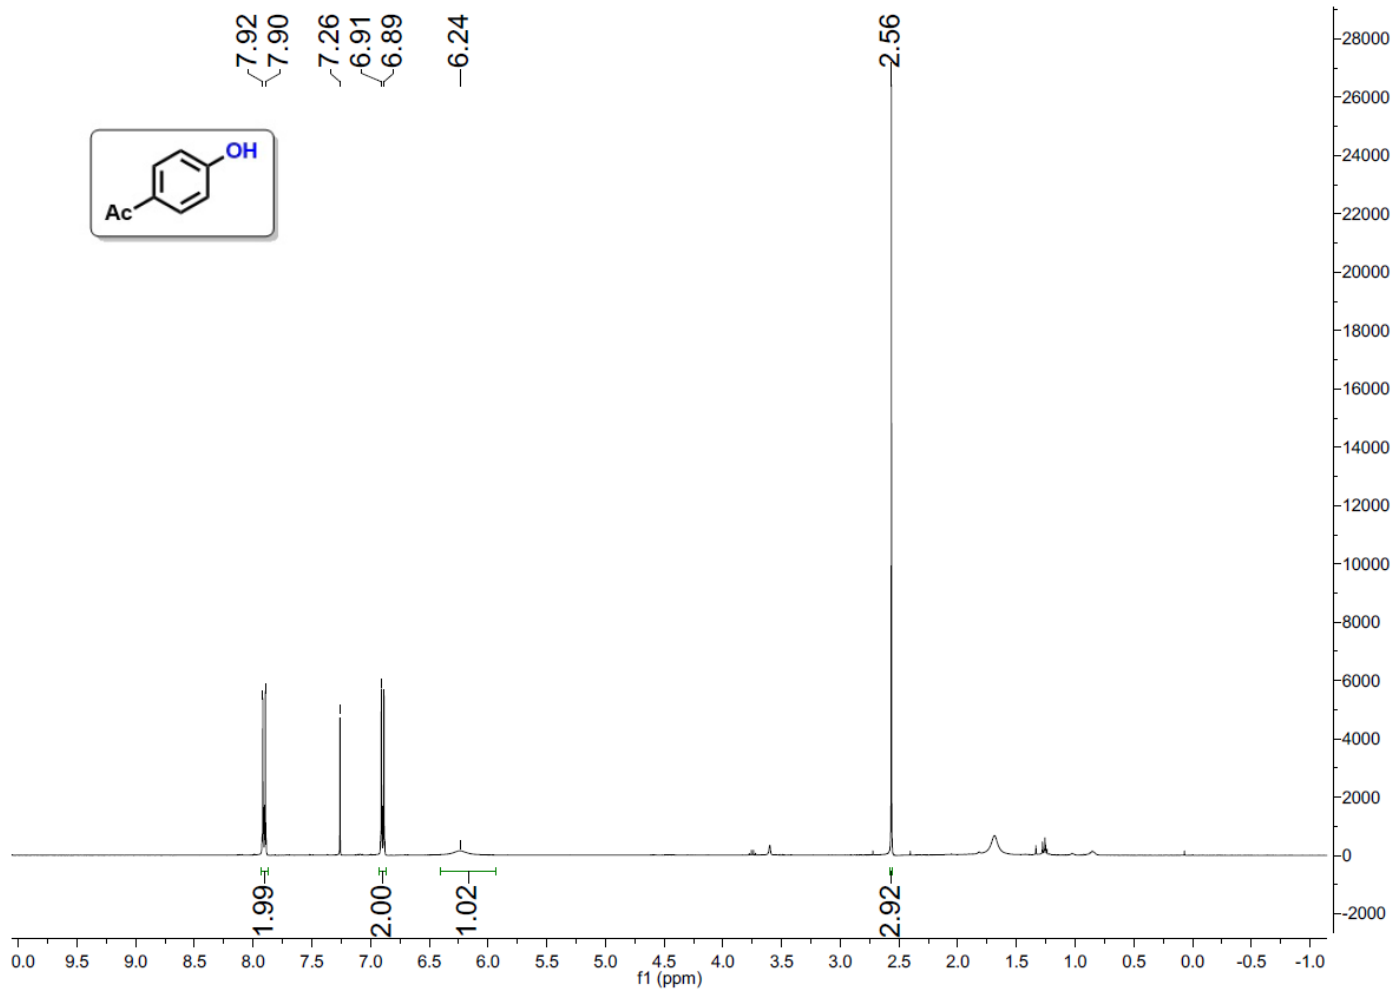

<sup>13</sup>C NMR of 2f

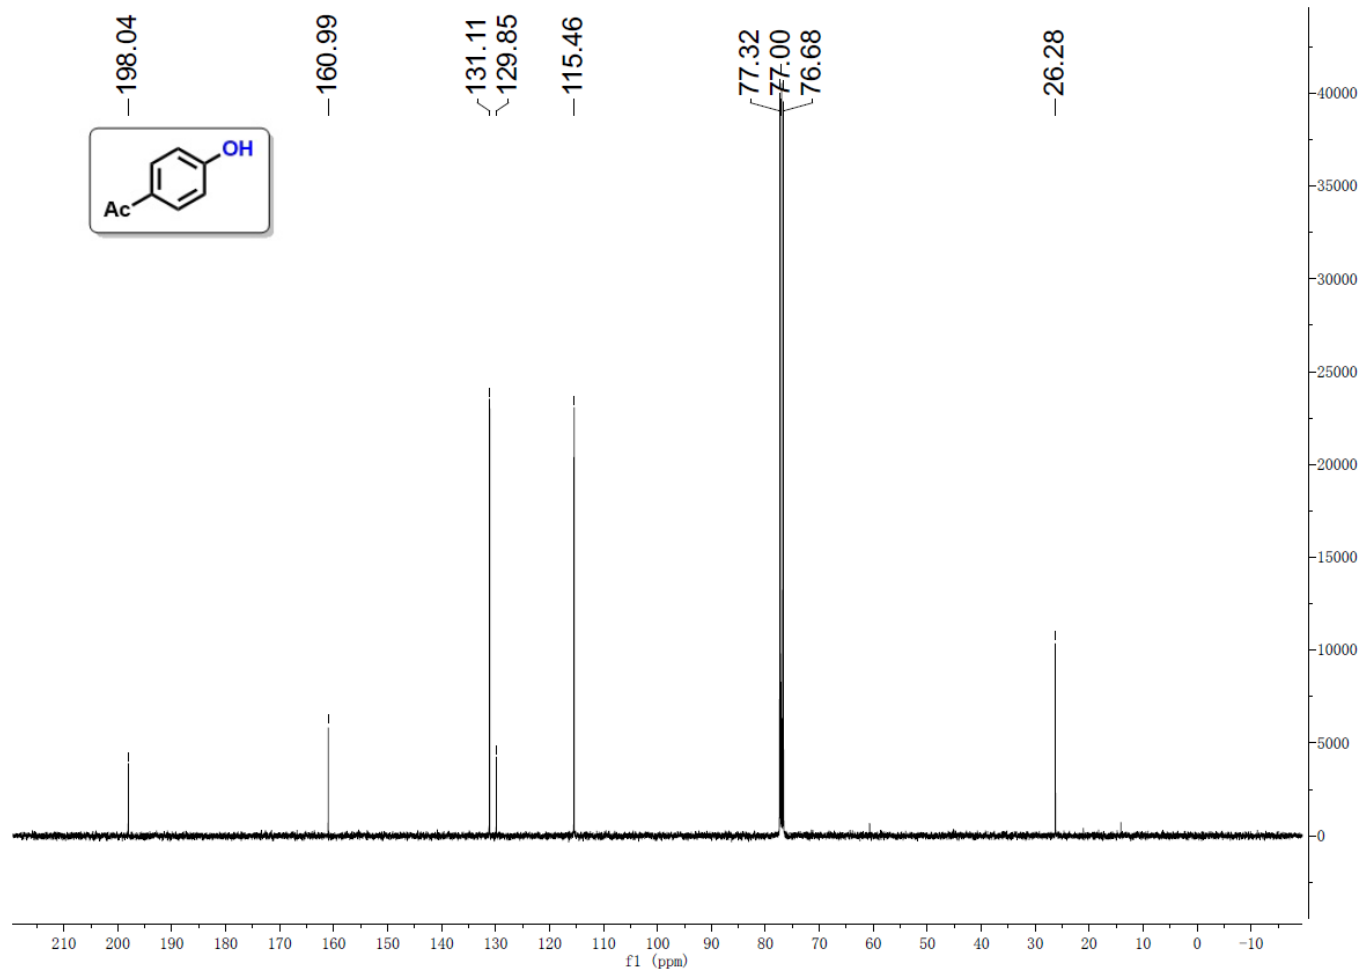

**<sup>1</sup>H NMR of 2g**

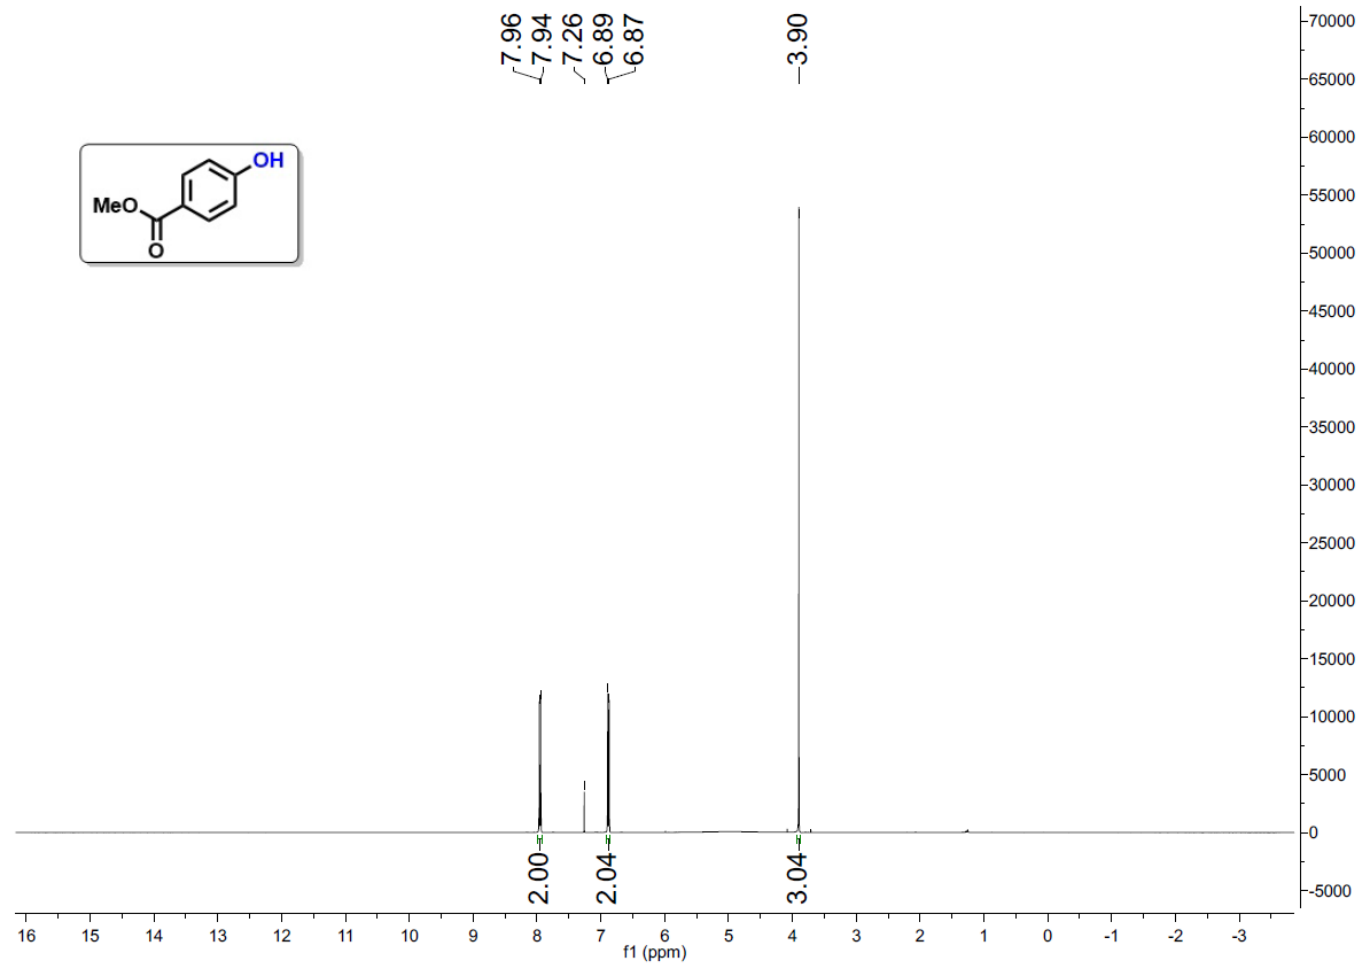

<sup>13</sup>C NMR of 2g

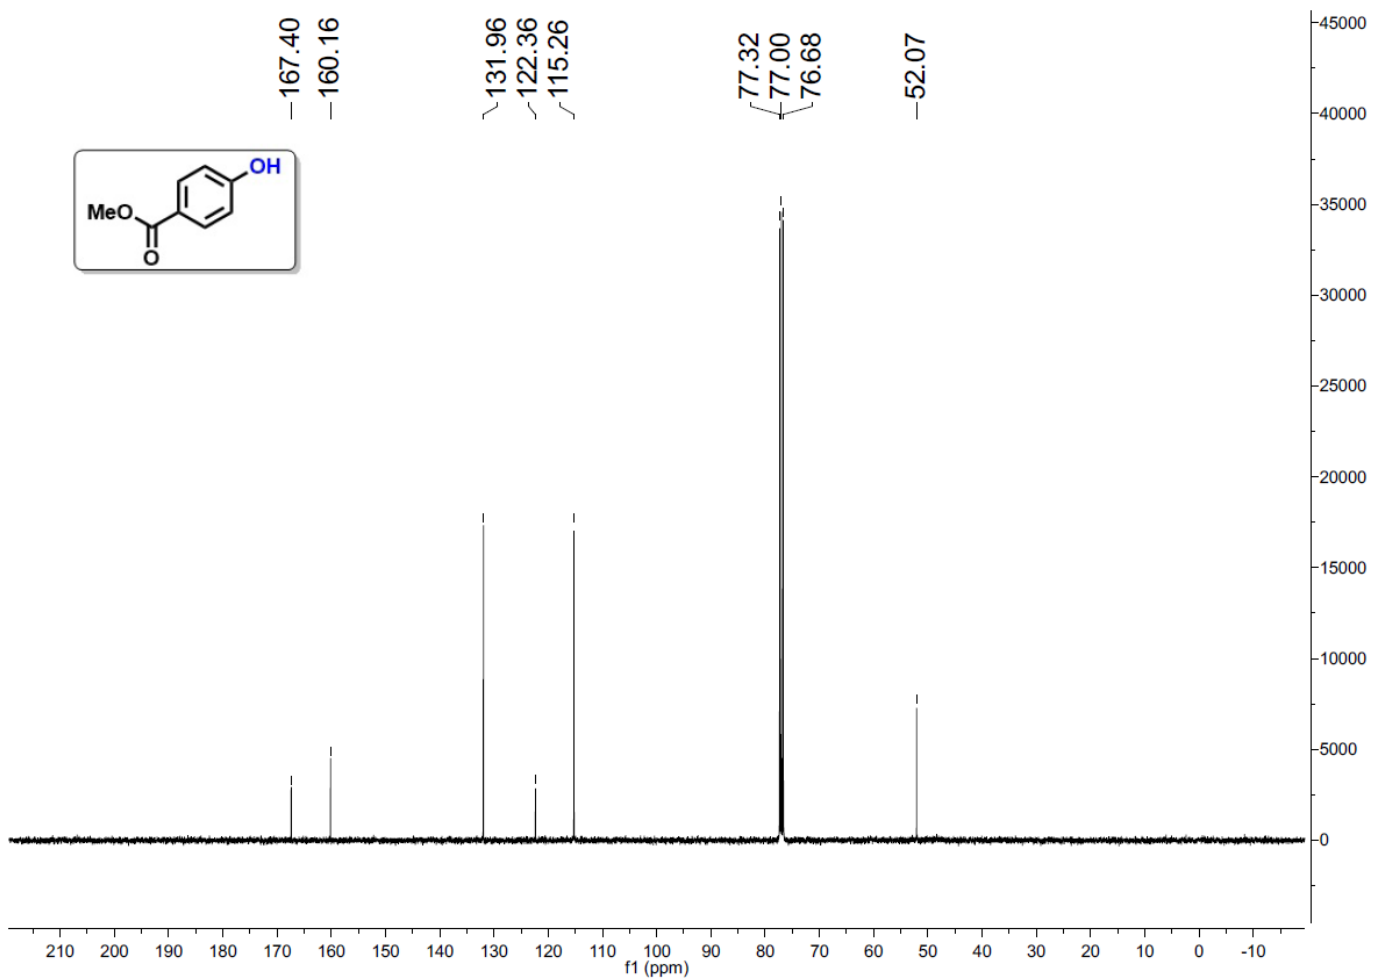

# <sup>1</sup>H NMR of 2h

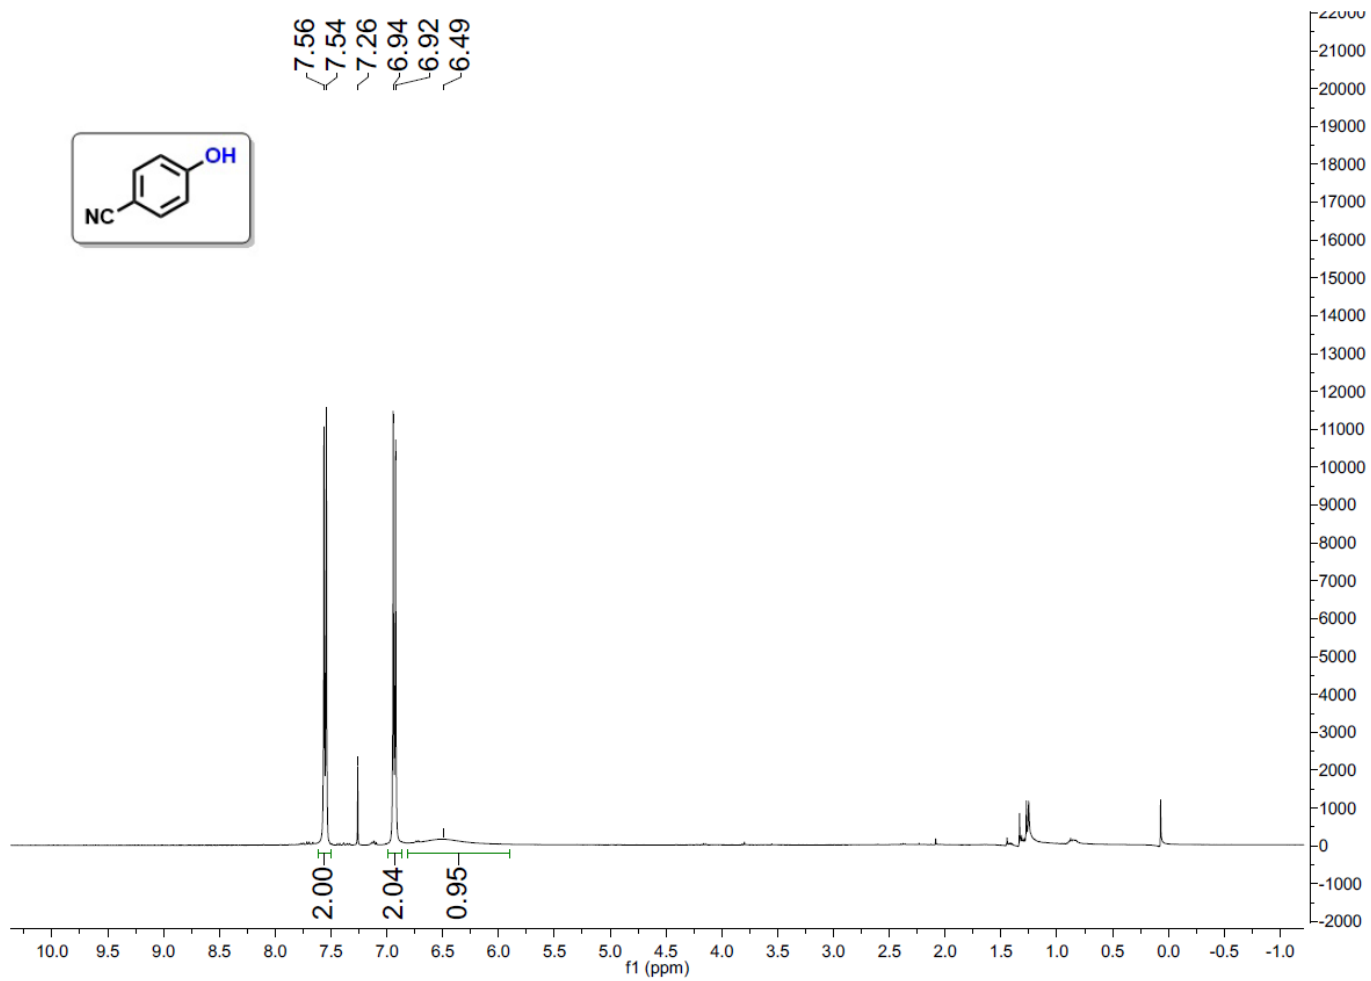



<sup>13</sup>C NMR of 2h

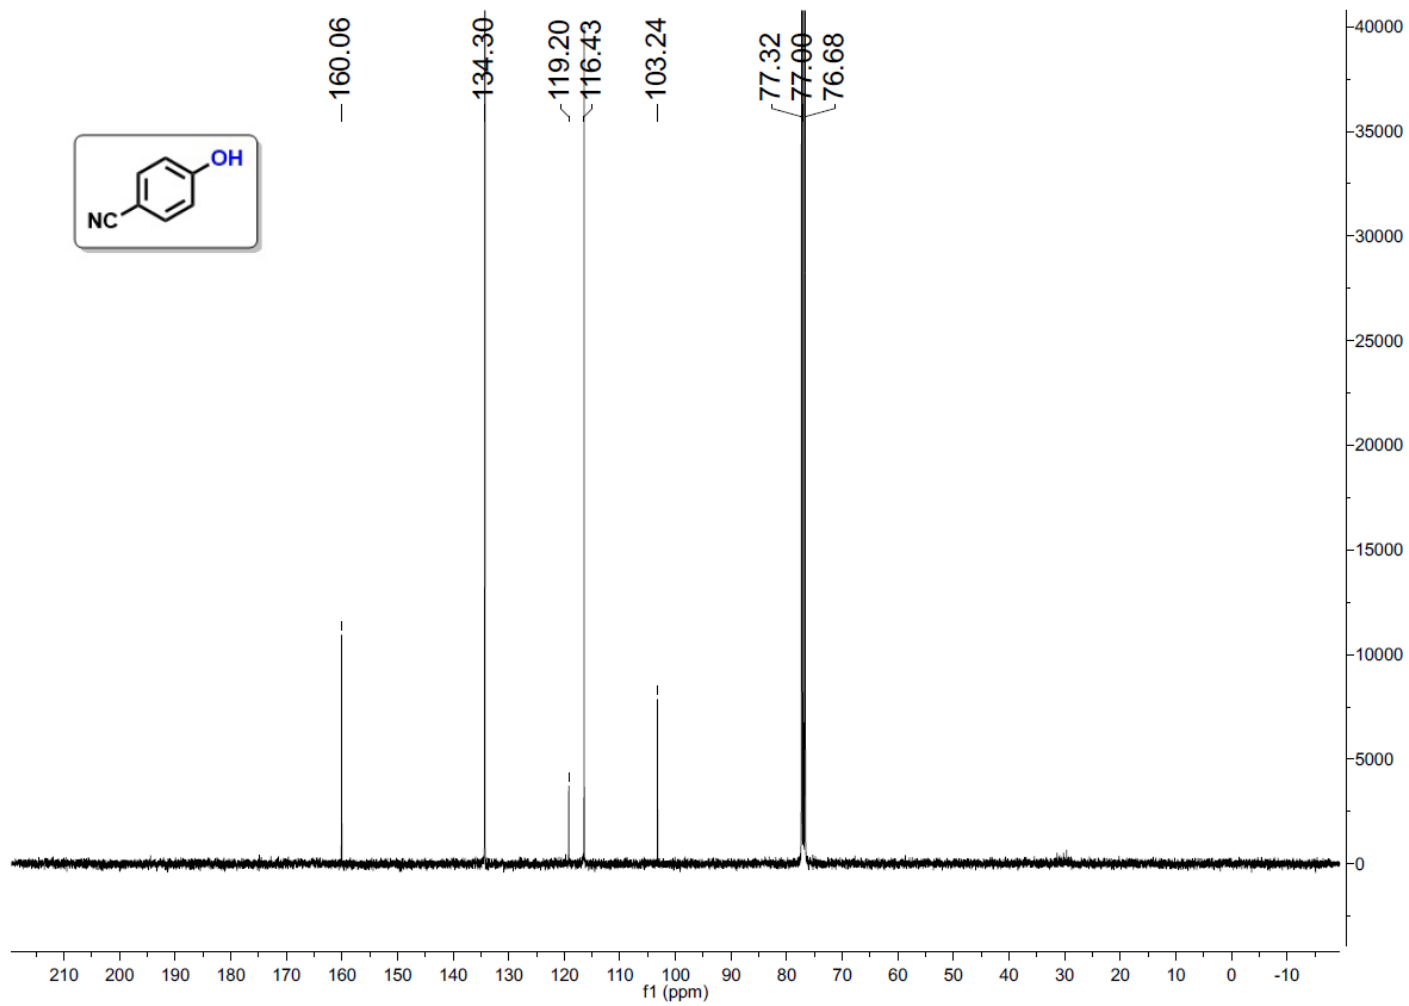

# <sup>1</sup>H NMR of 2i

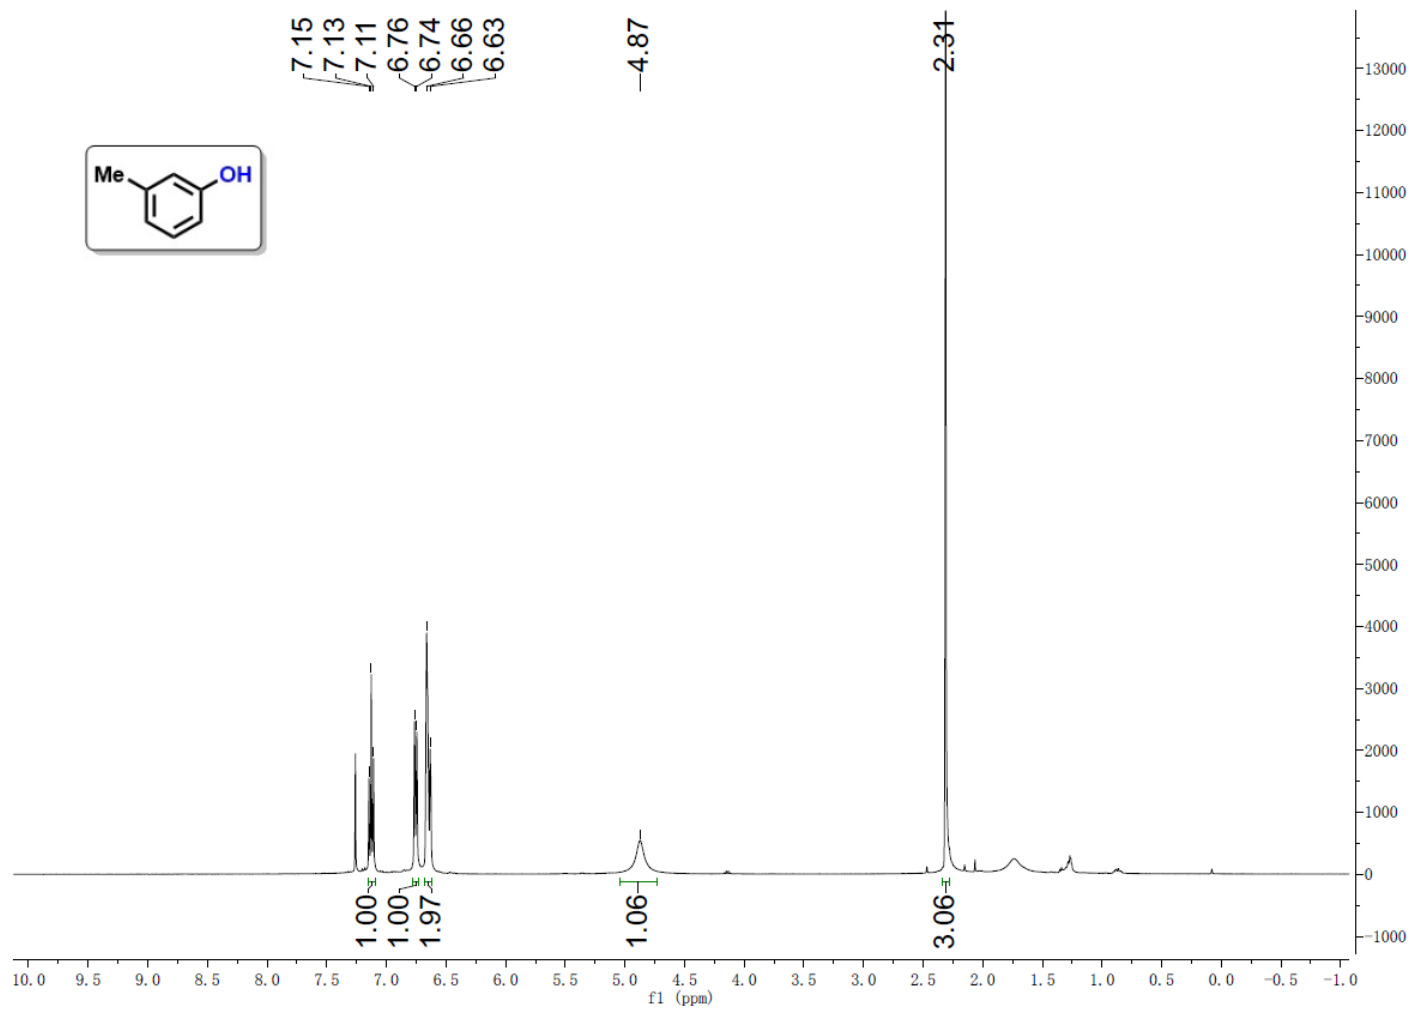

<sup>13</sup>C NMR of 2i

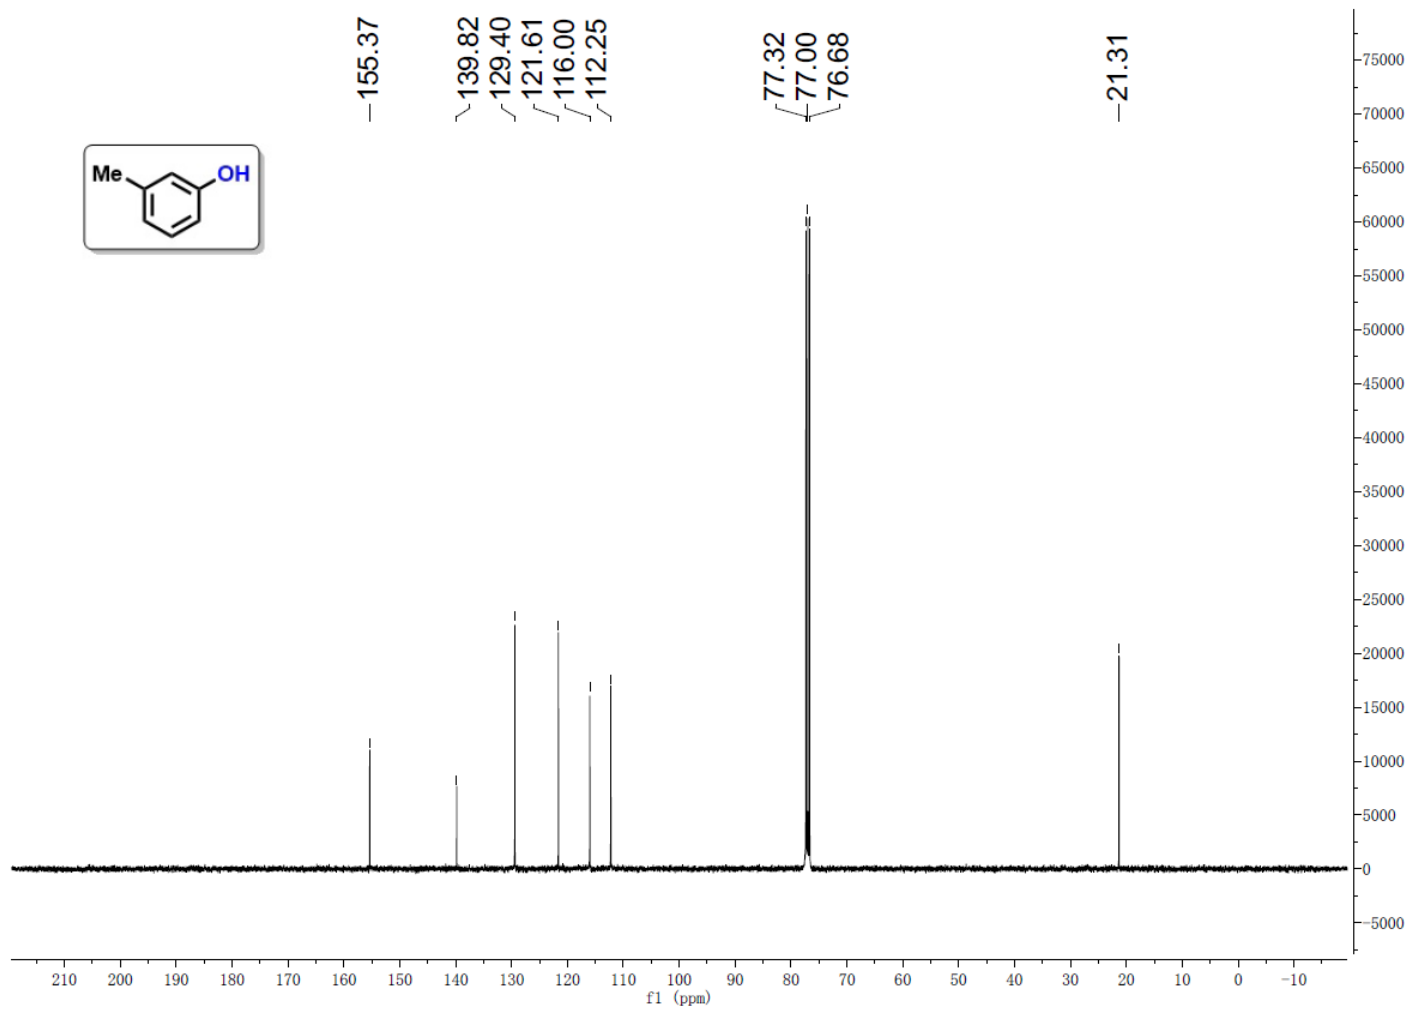

<sup>1</sup>H NMR of 2j

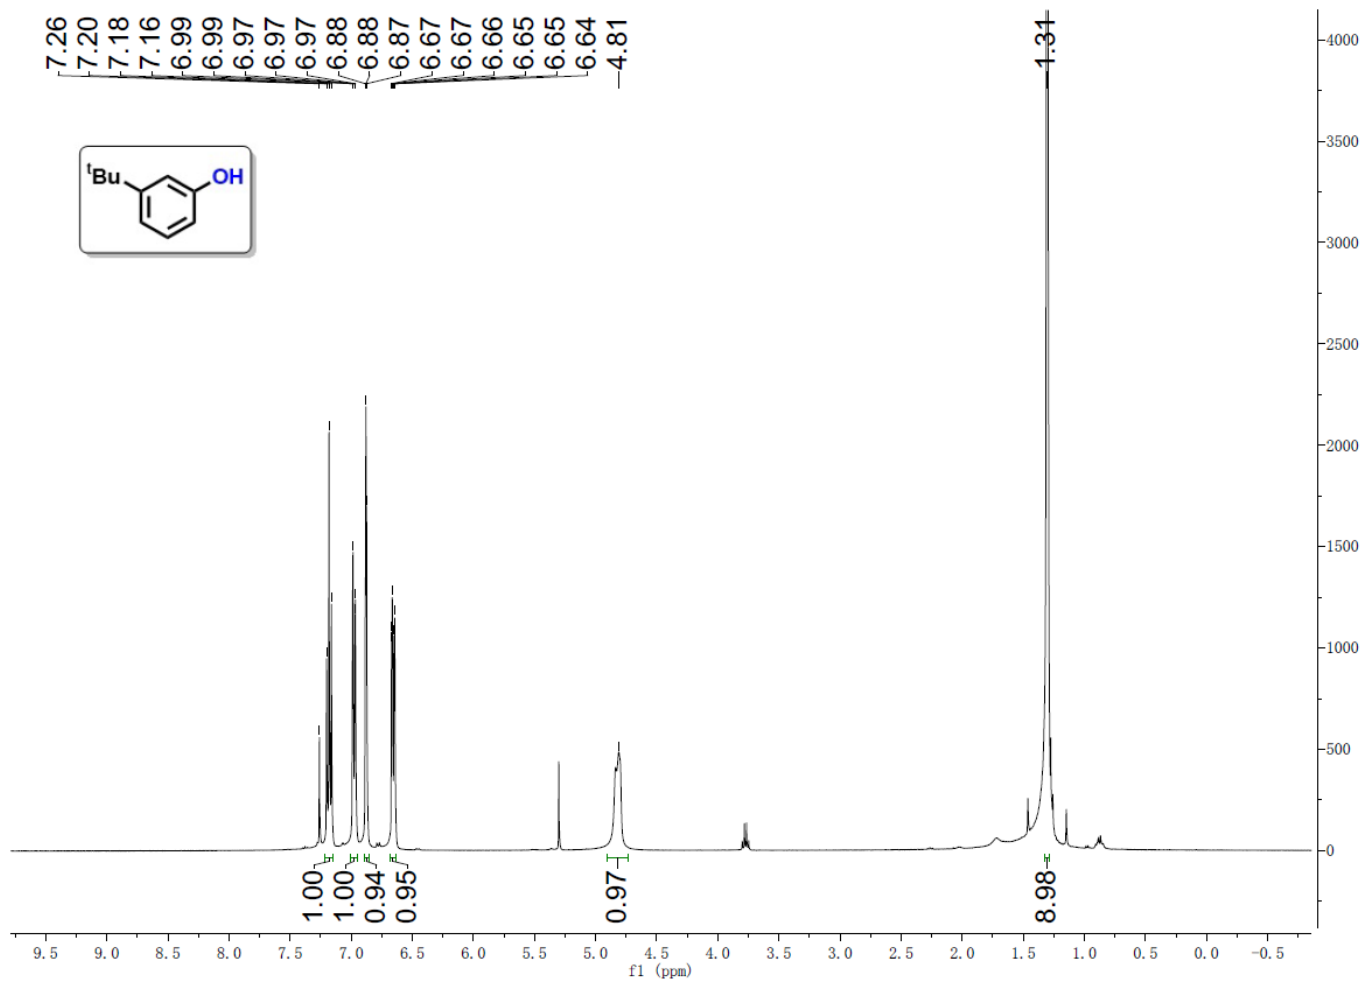

<sup>13</sup>C NMR of 2j

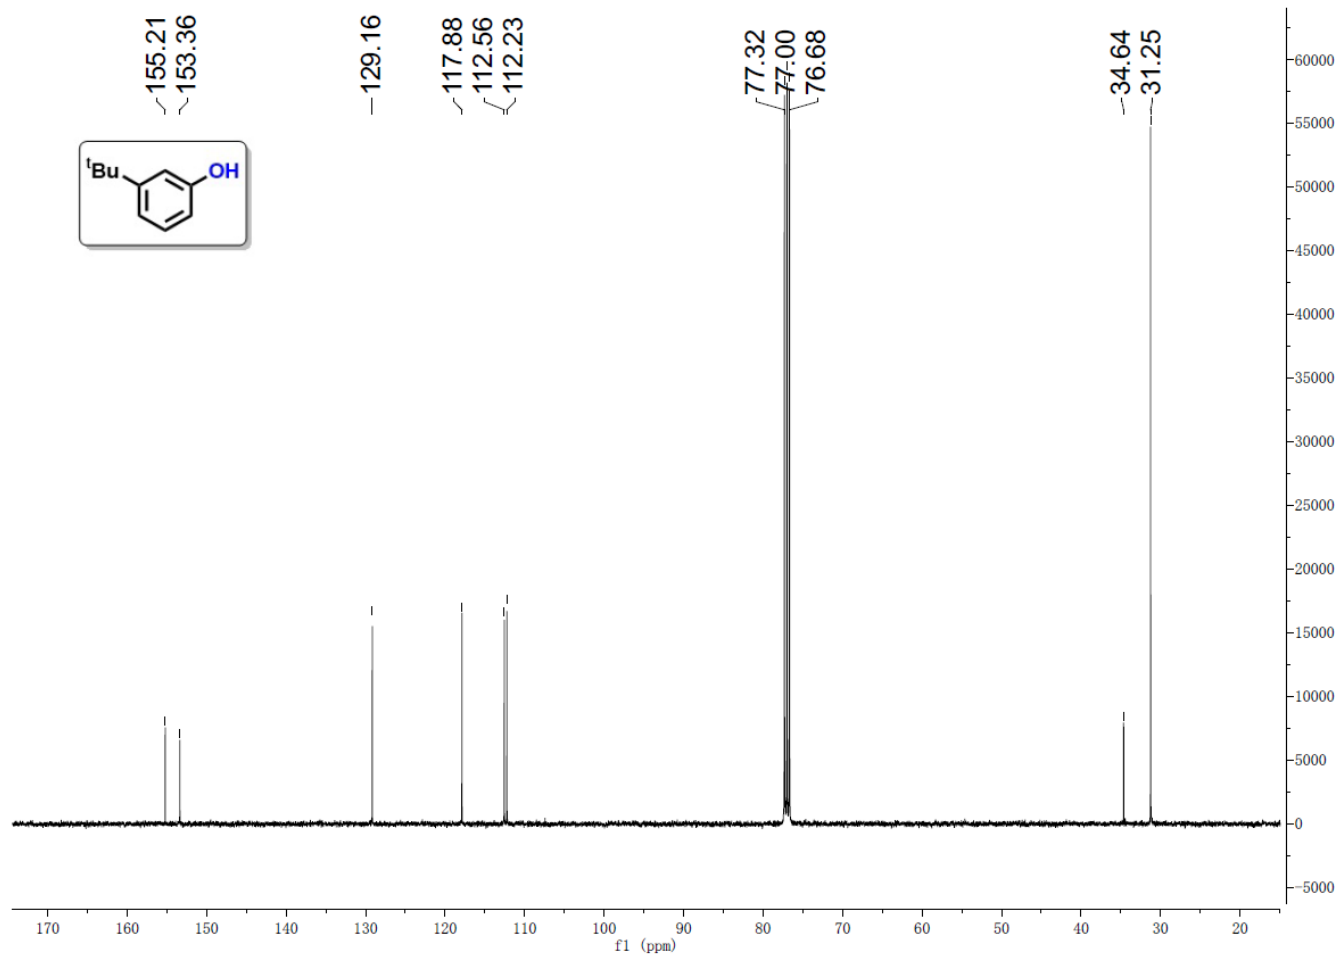

# <sup>1</sup>H NMR of 2k

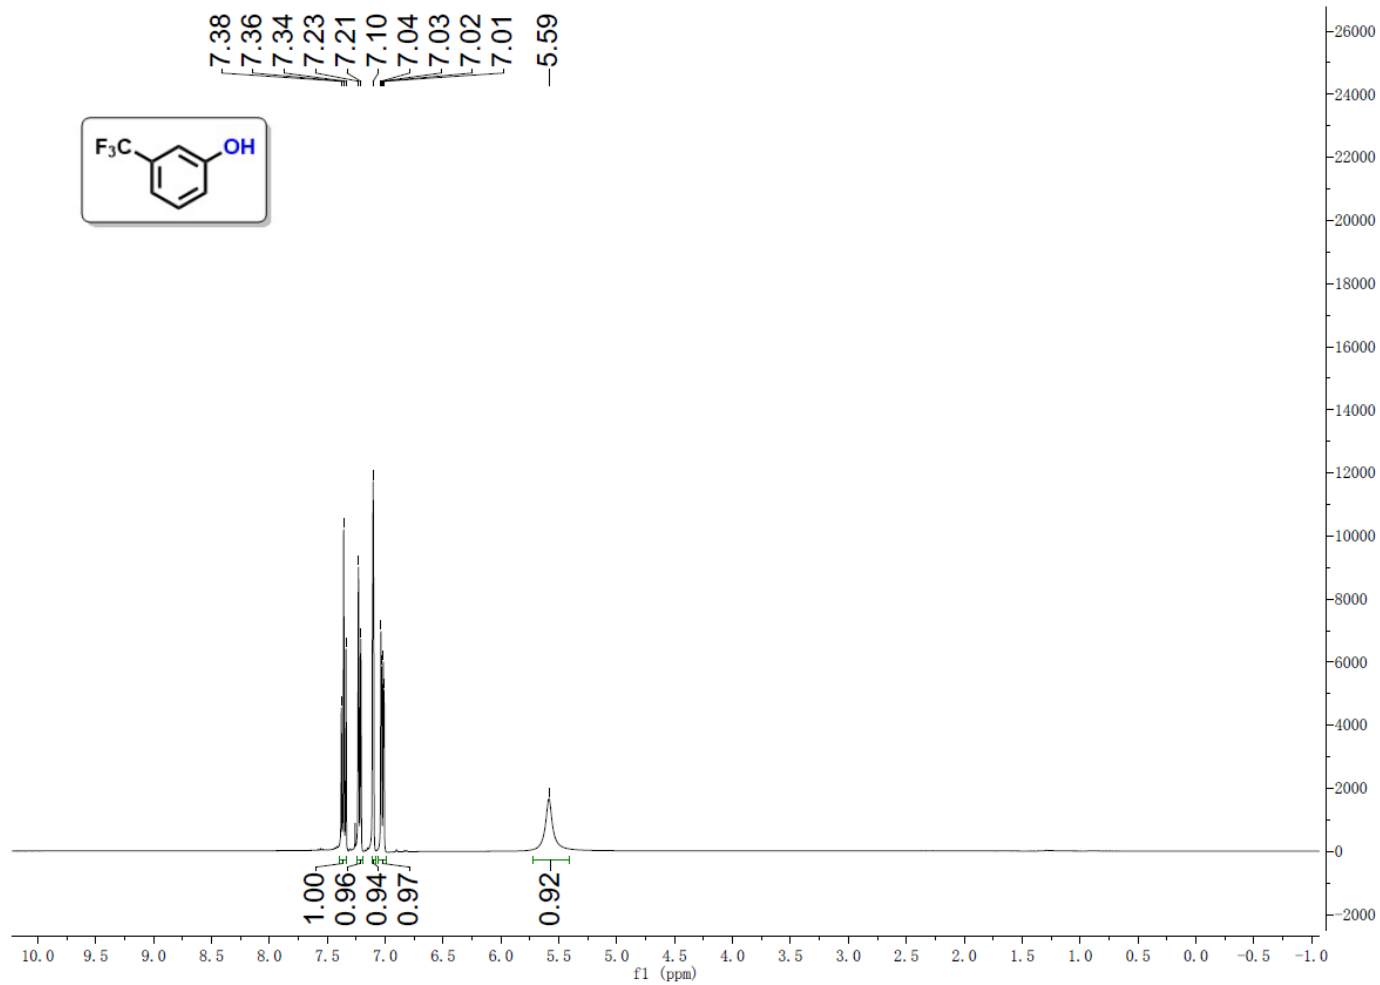

### <sup>13</sup>C NMR of 2k

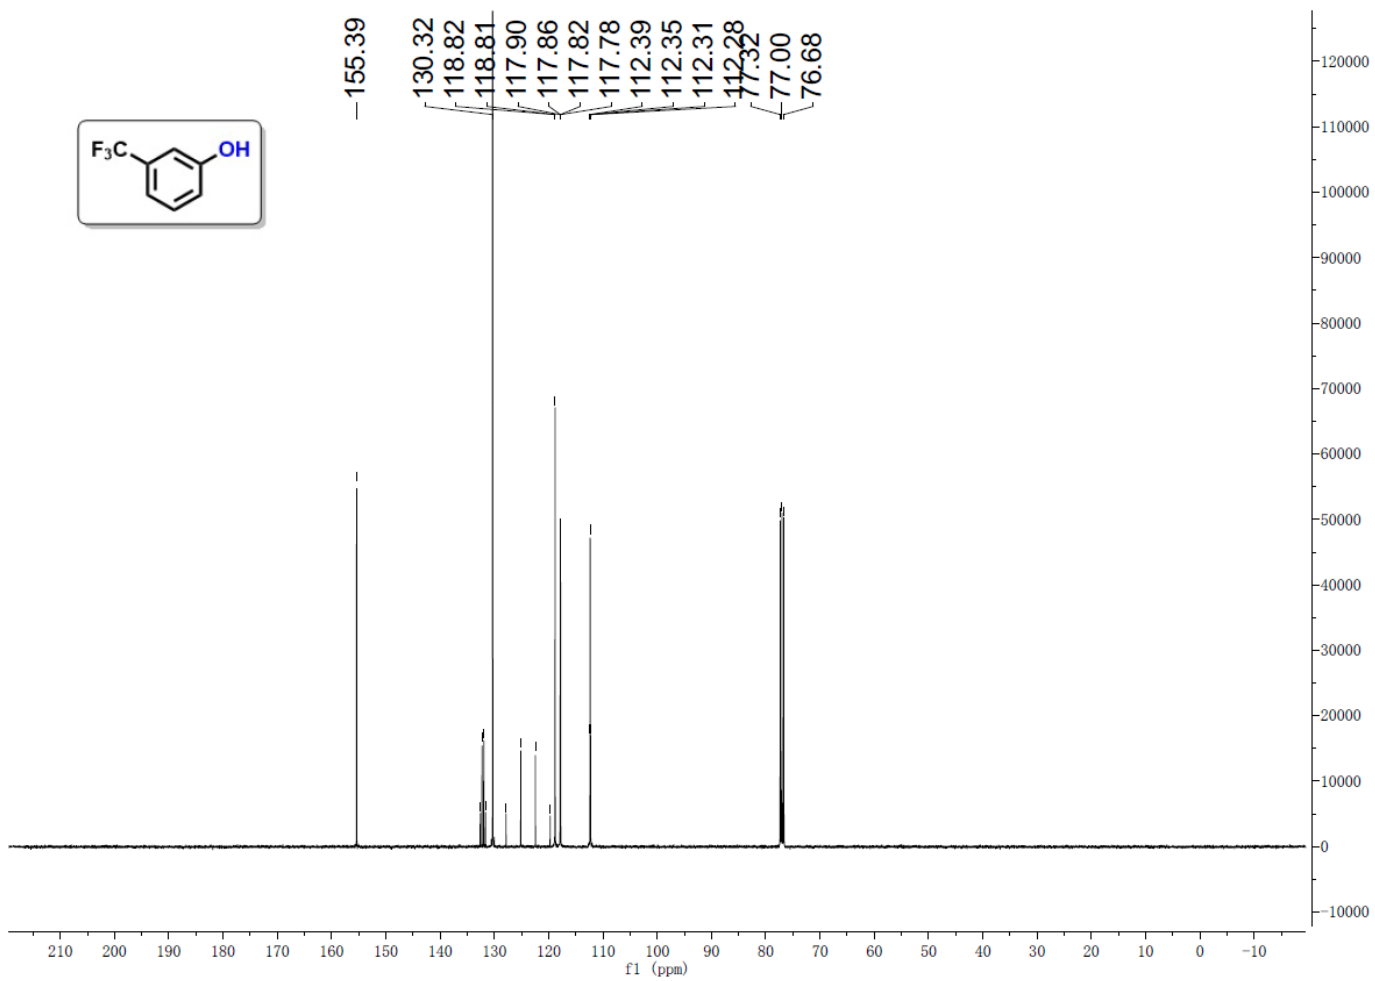

# <sup>19</sup>F NMR of 2k

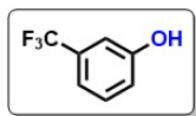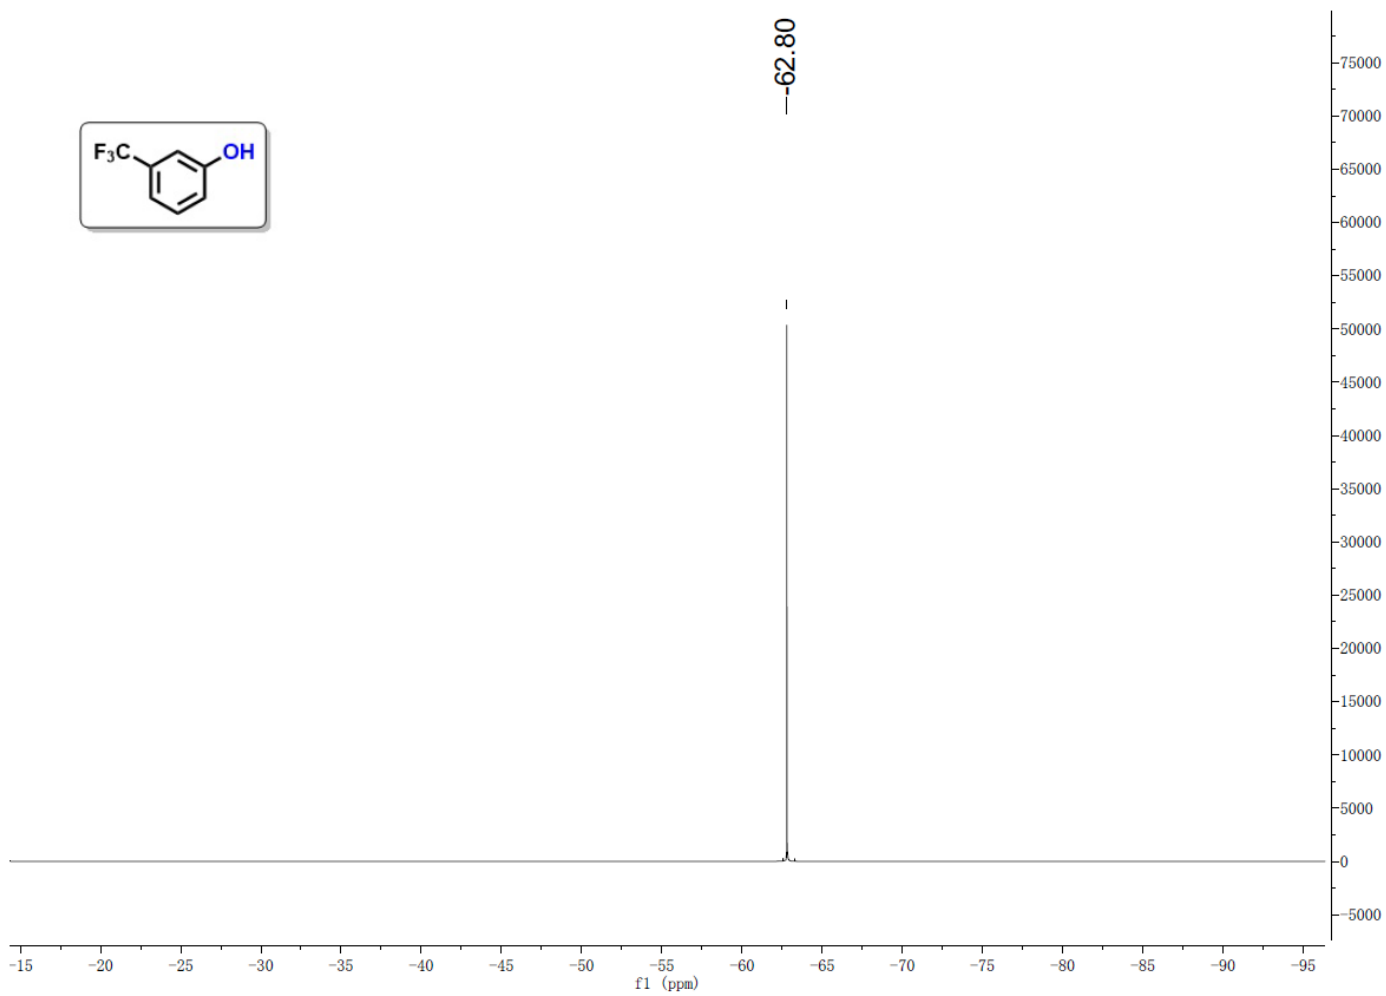



# <sup>1</sup>H NMR of 2l

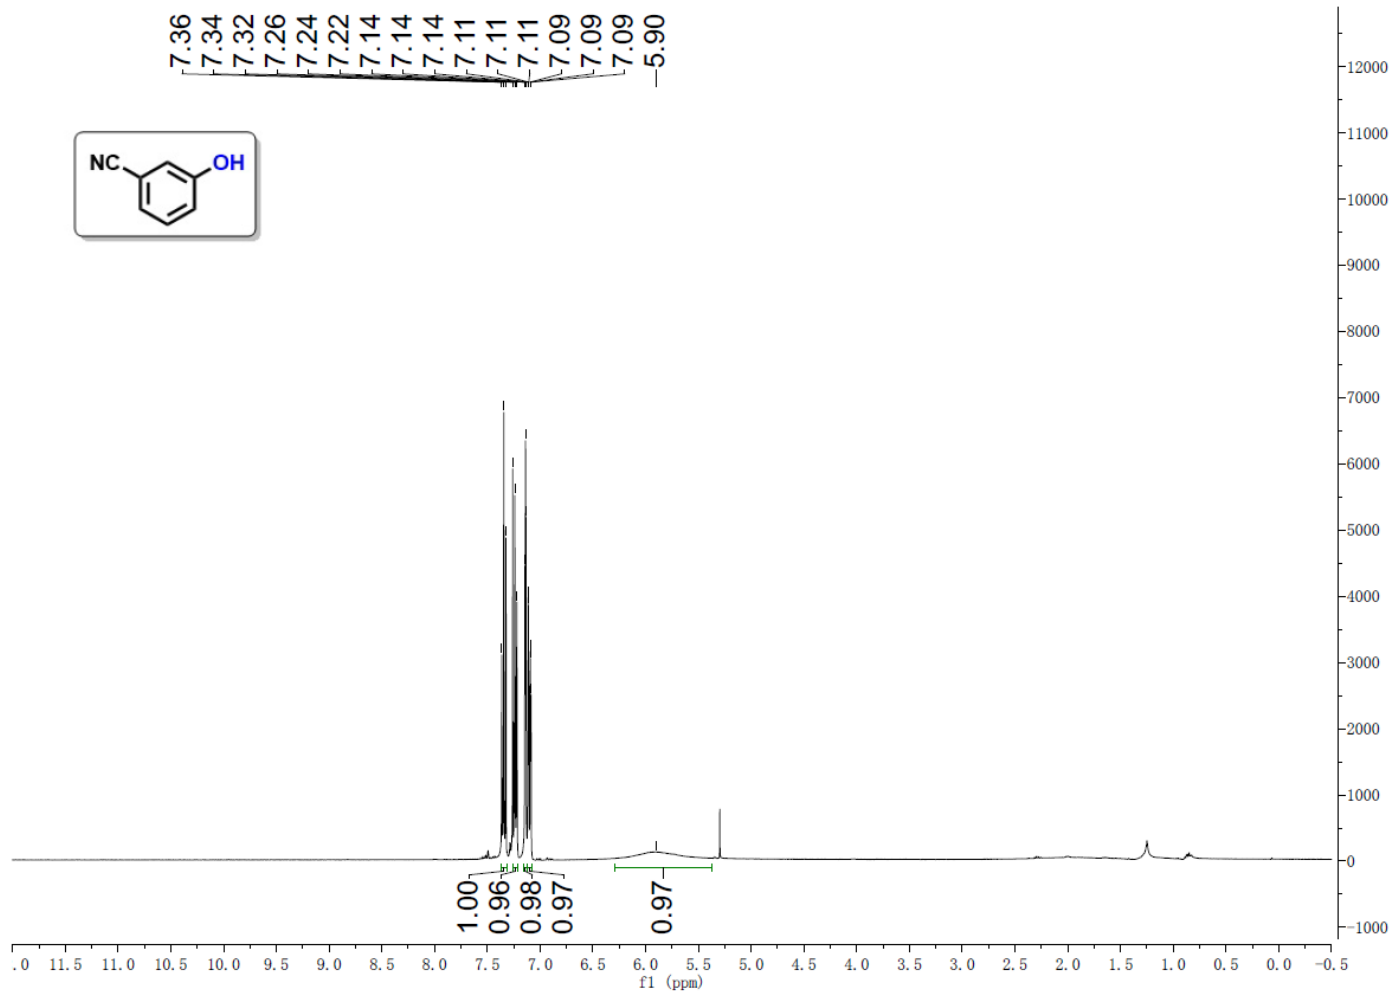

### <sup>13</sup>C NMR of 2l

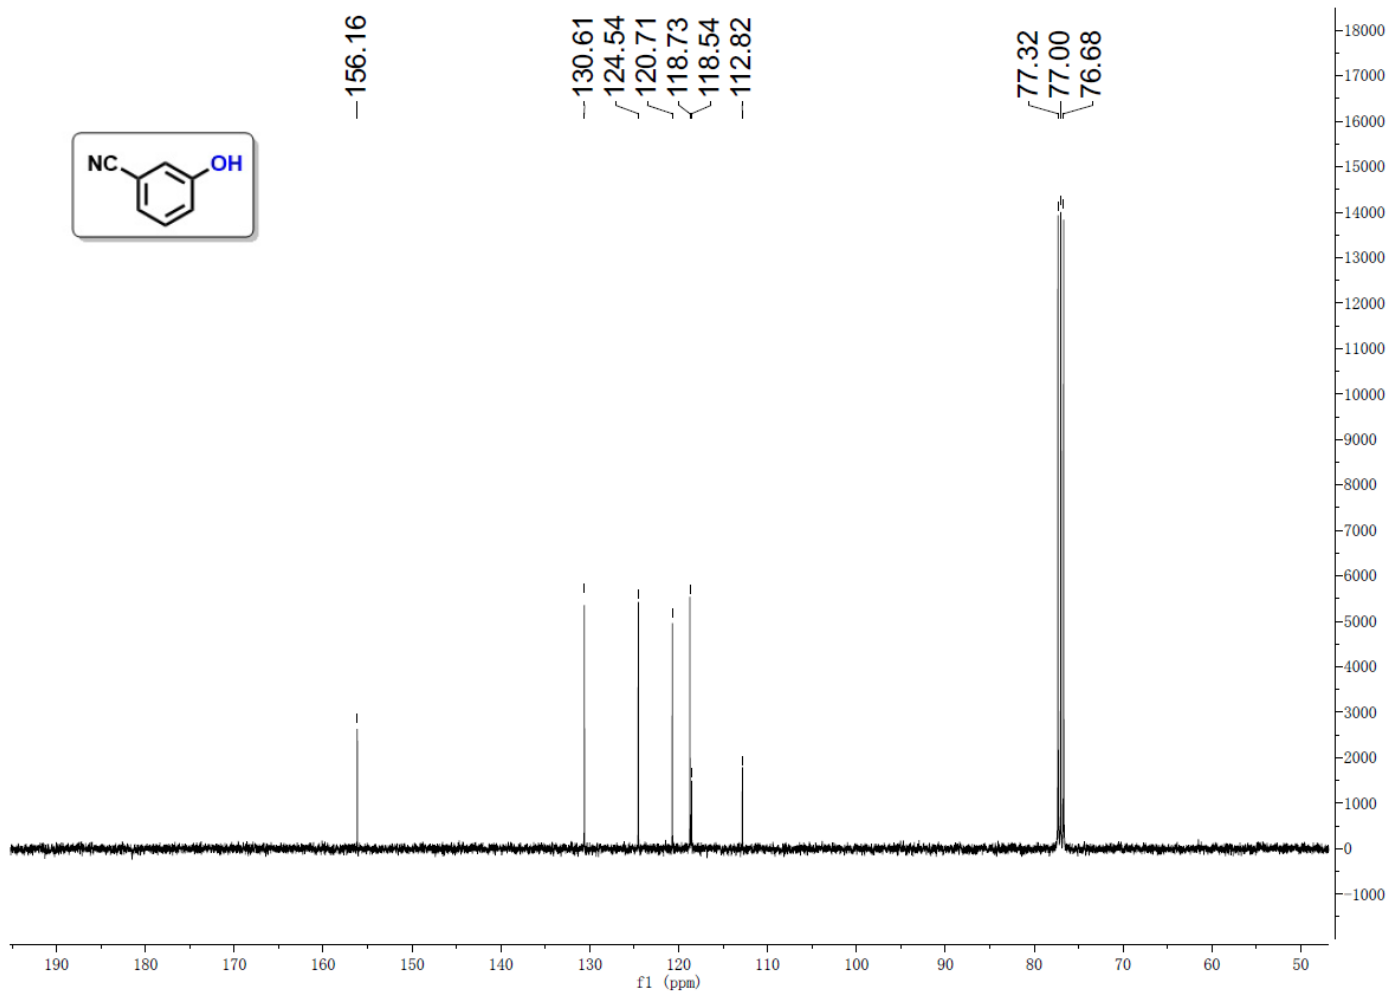

# <sup>1</sup>H NMR of 2m

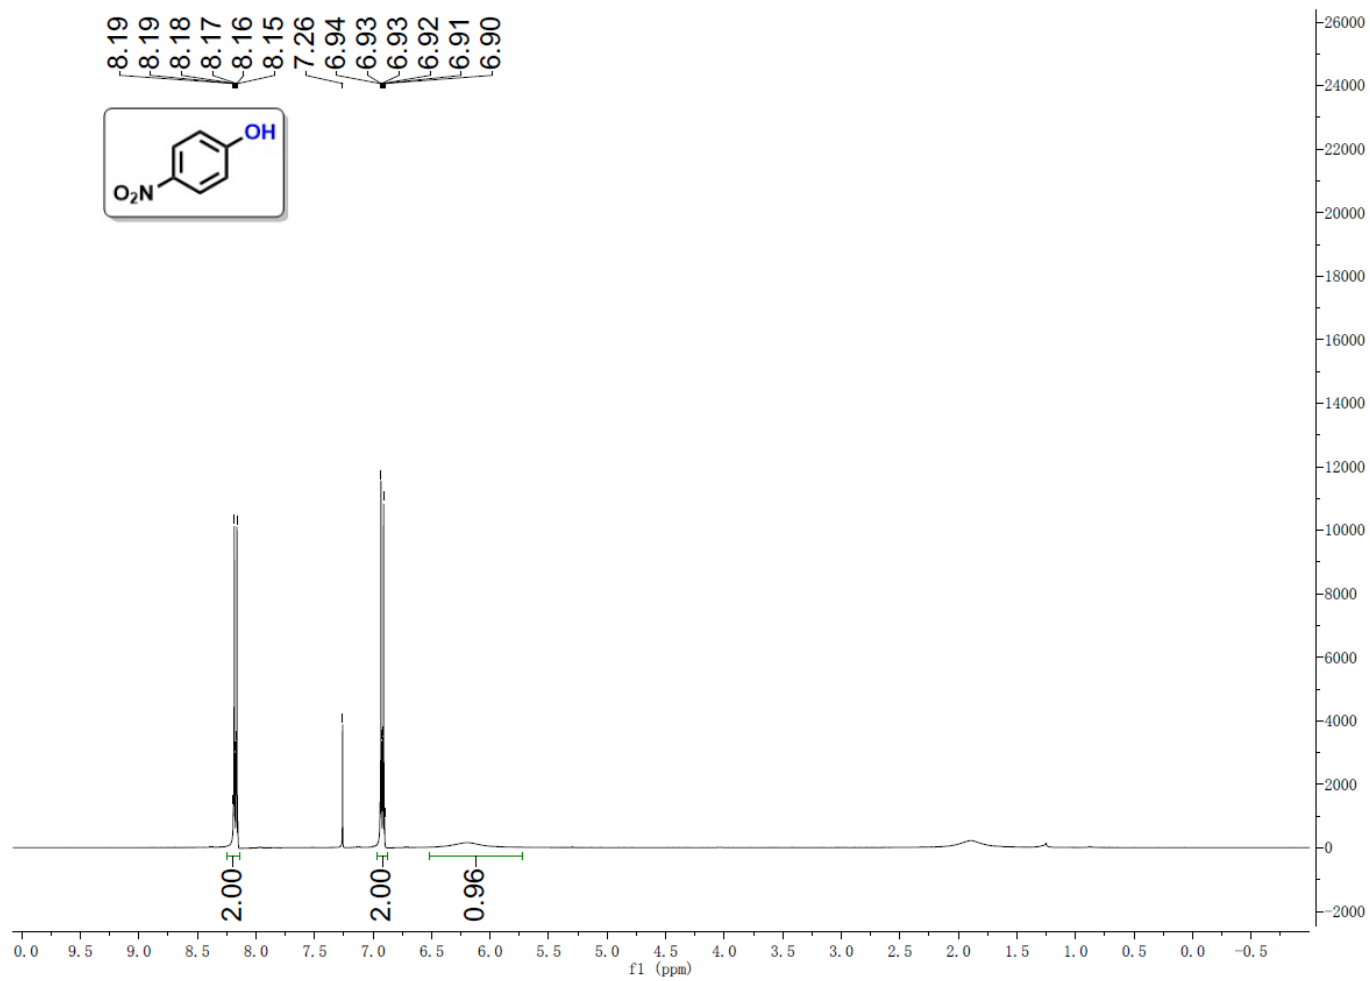

<sup>13</sup>C NMR of 2m

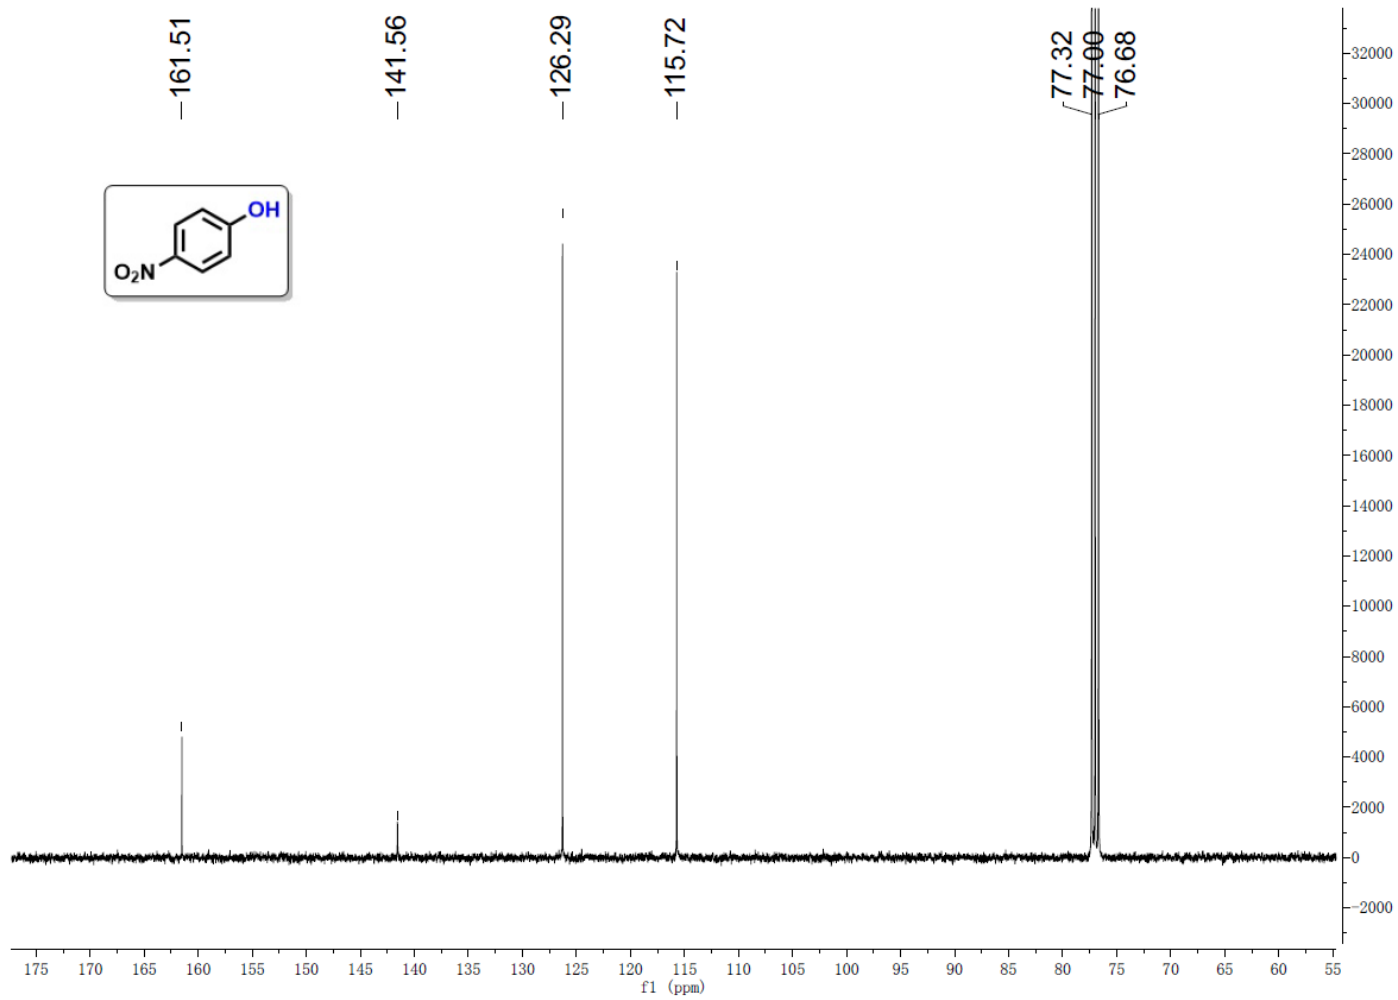

**<sup>1</sup>H NMR of 2n**

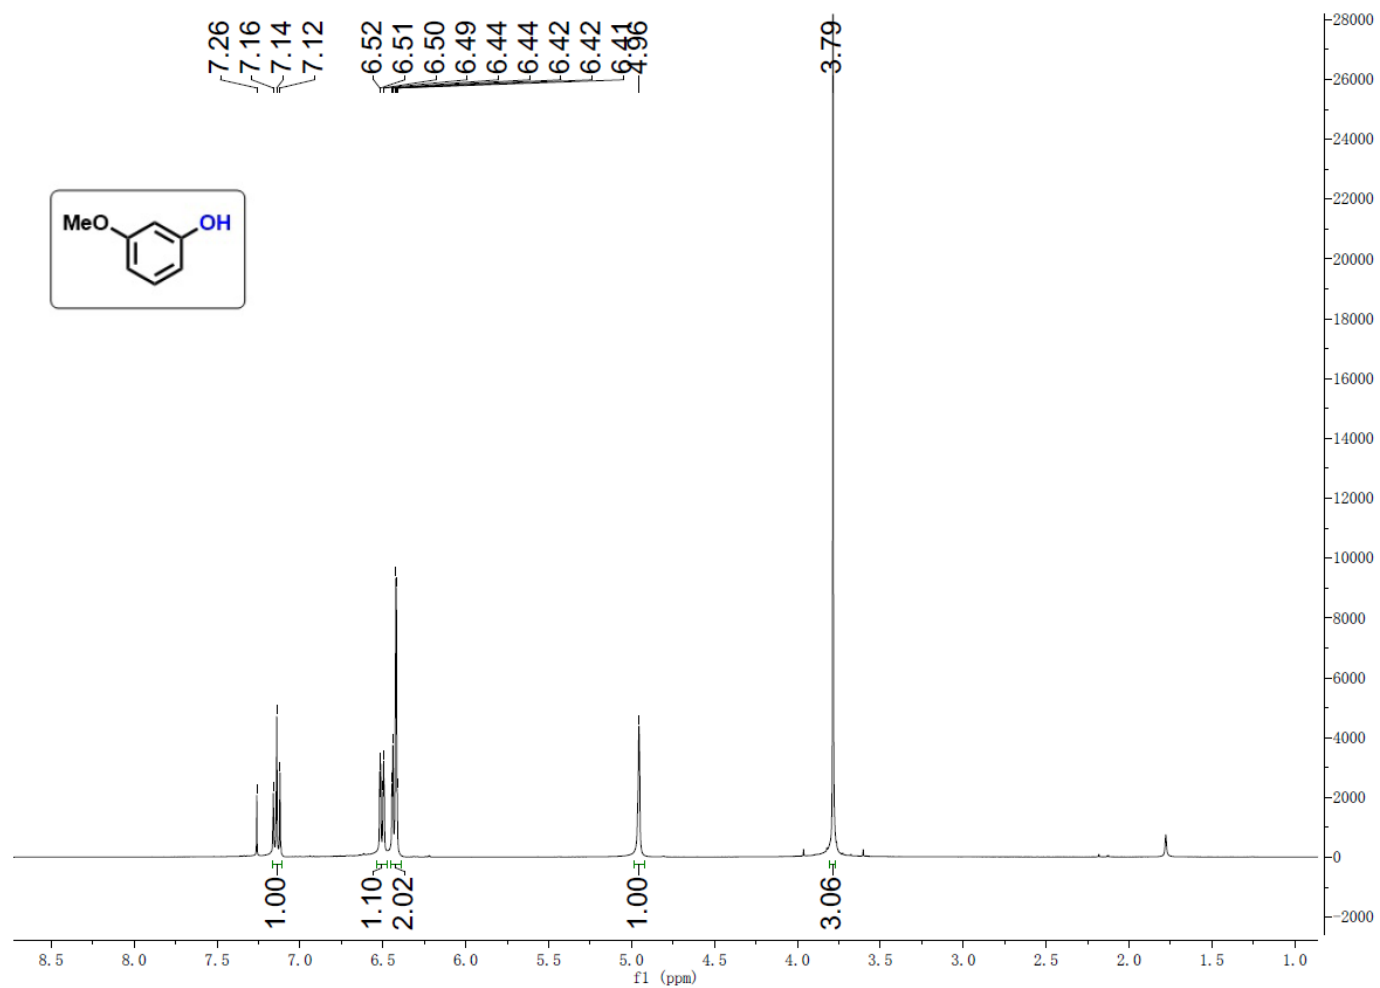

### <sup>13</sup>C NMR of 2n

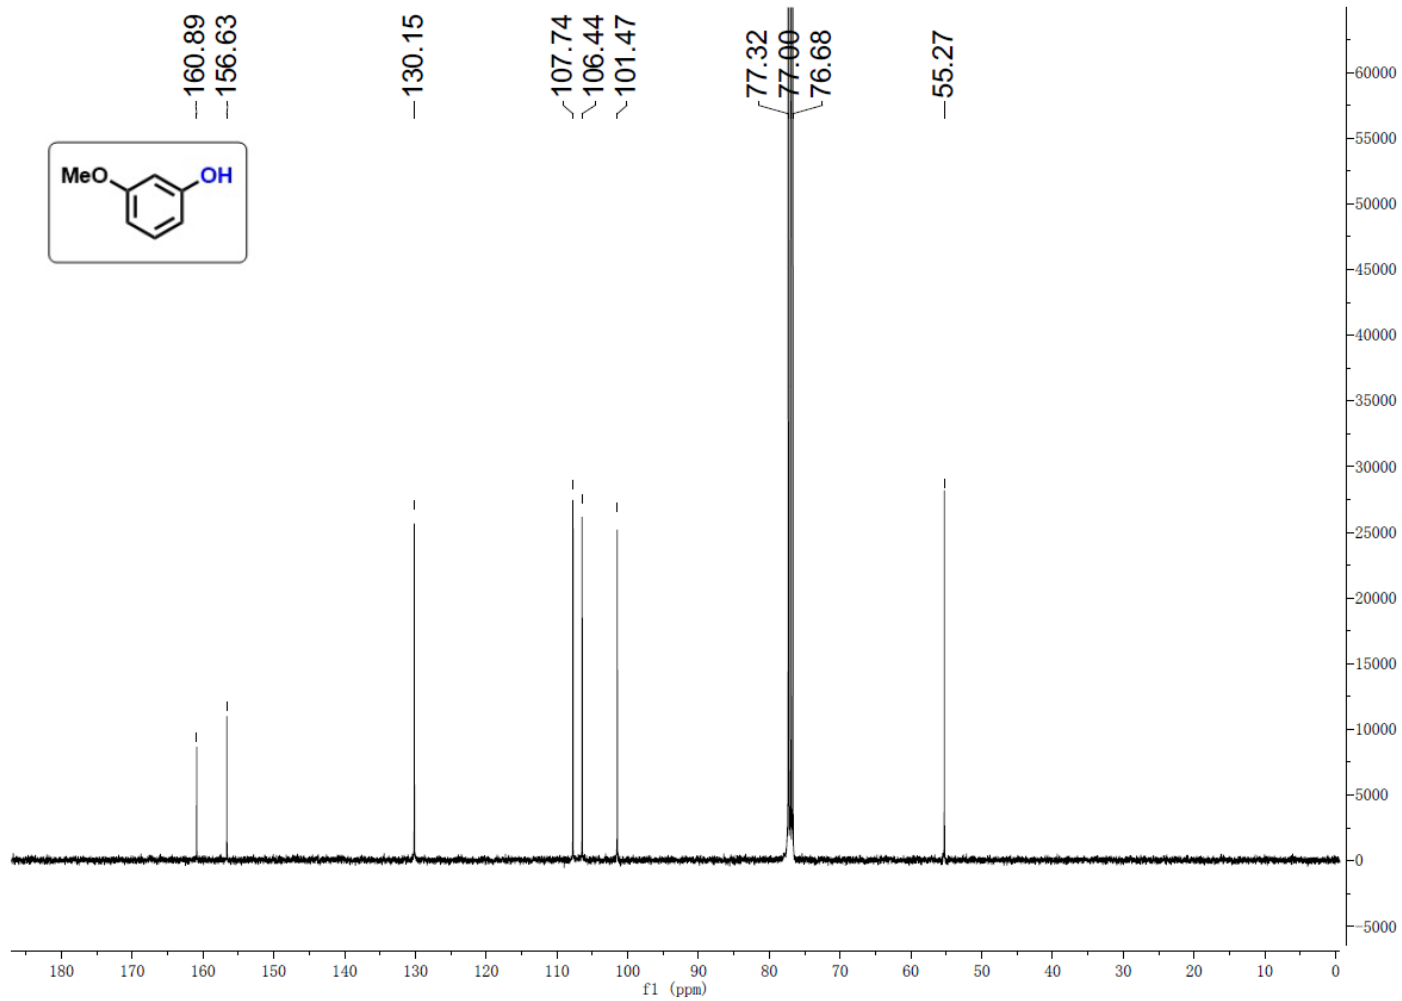

# <sup>1</sup>H NMR of 2o

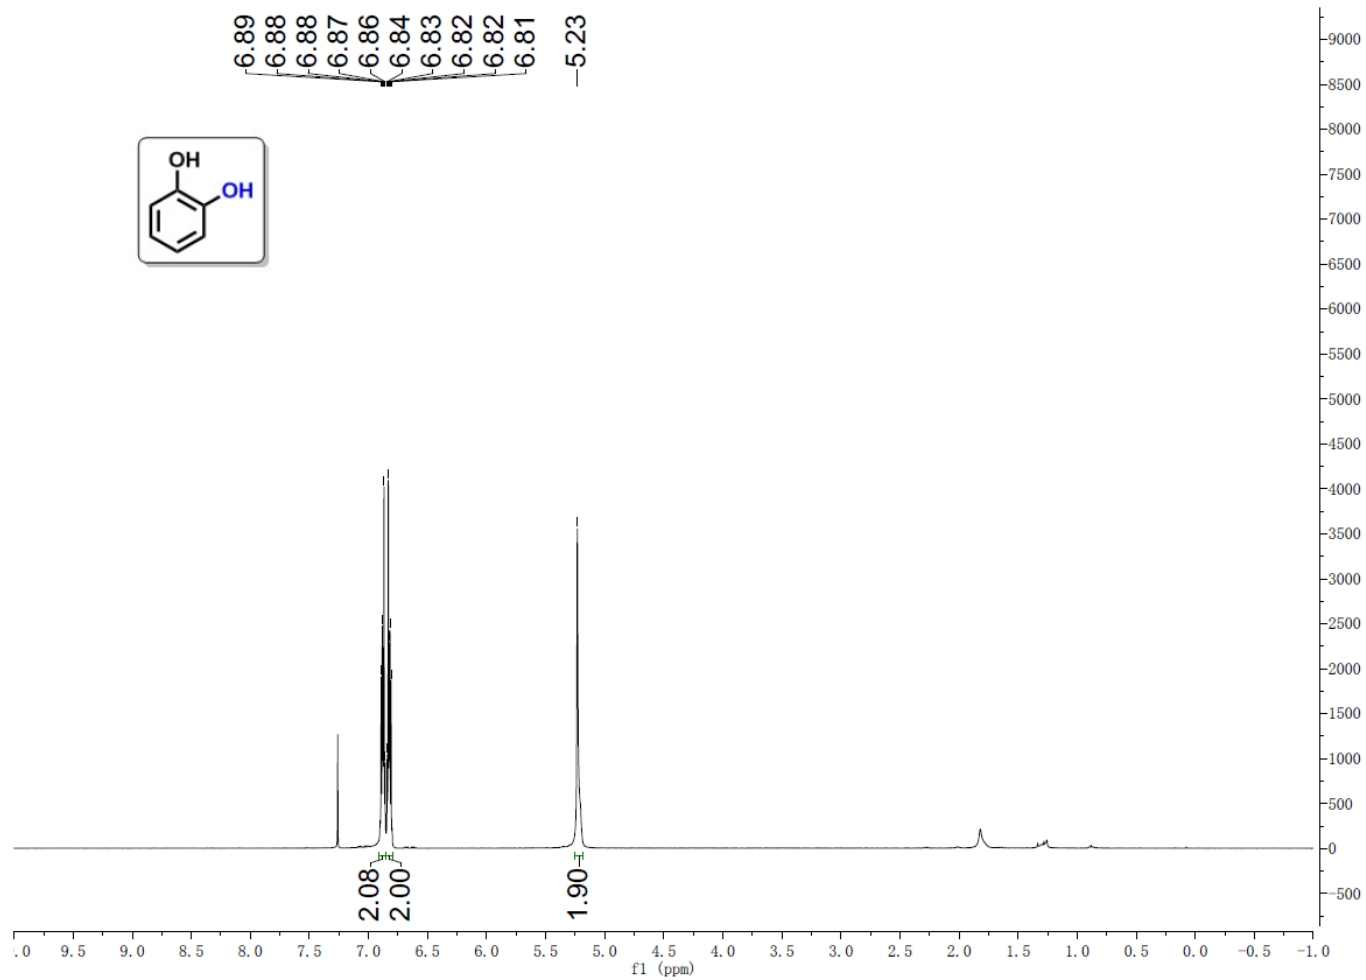

<sup>13</sup>C NMR of 2o

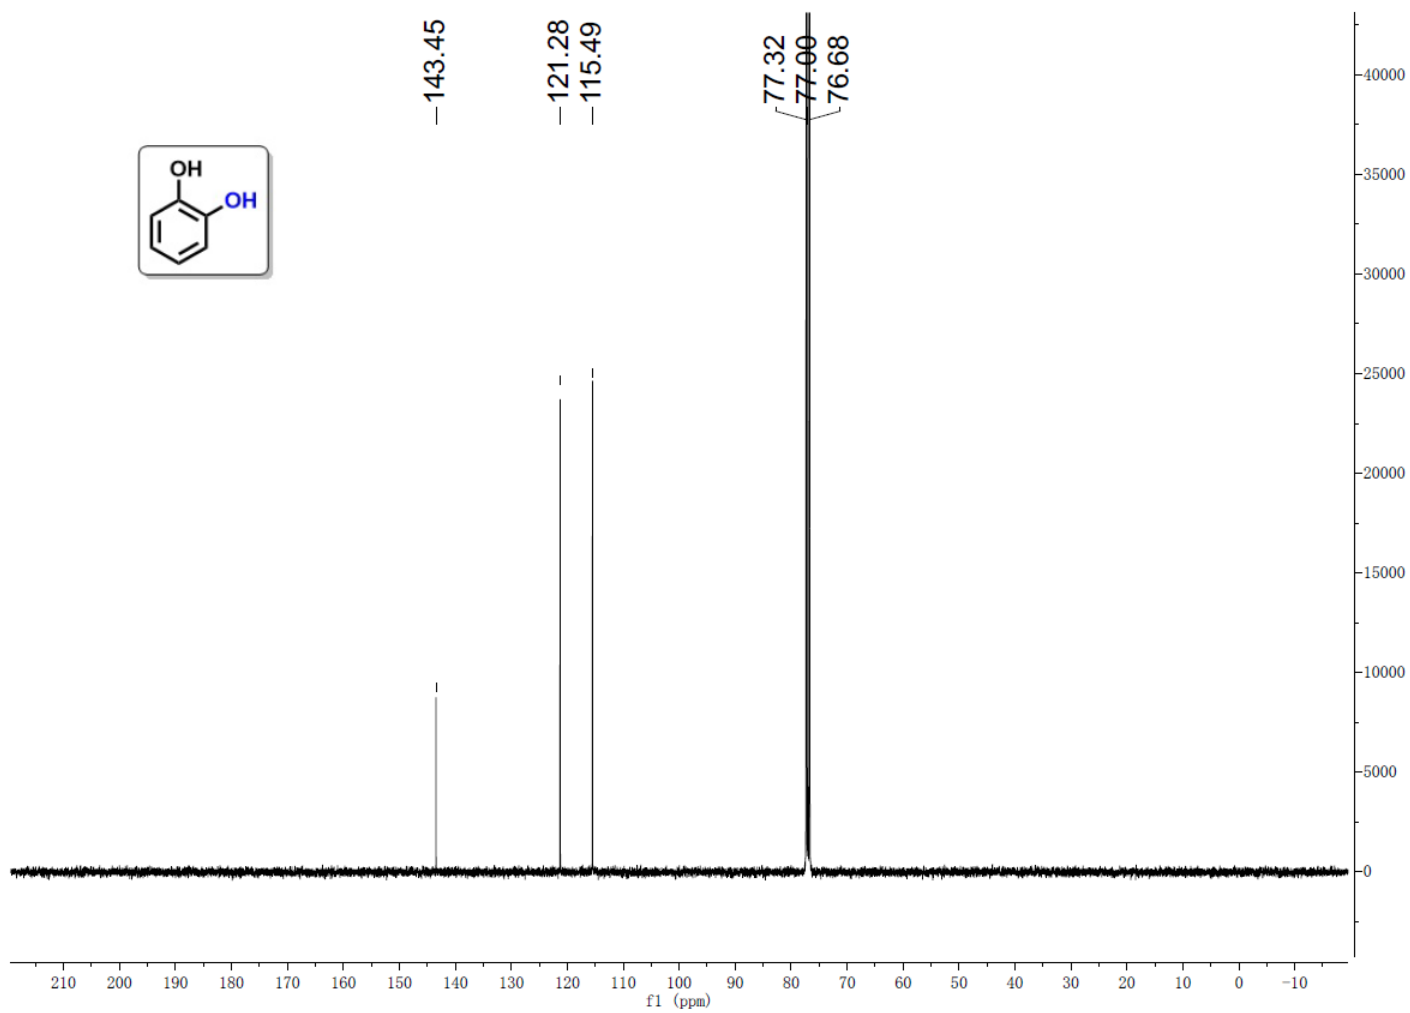



# <sup>1</sup>H NMR of 2p

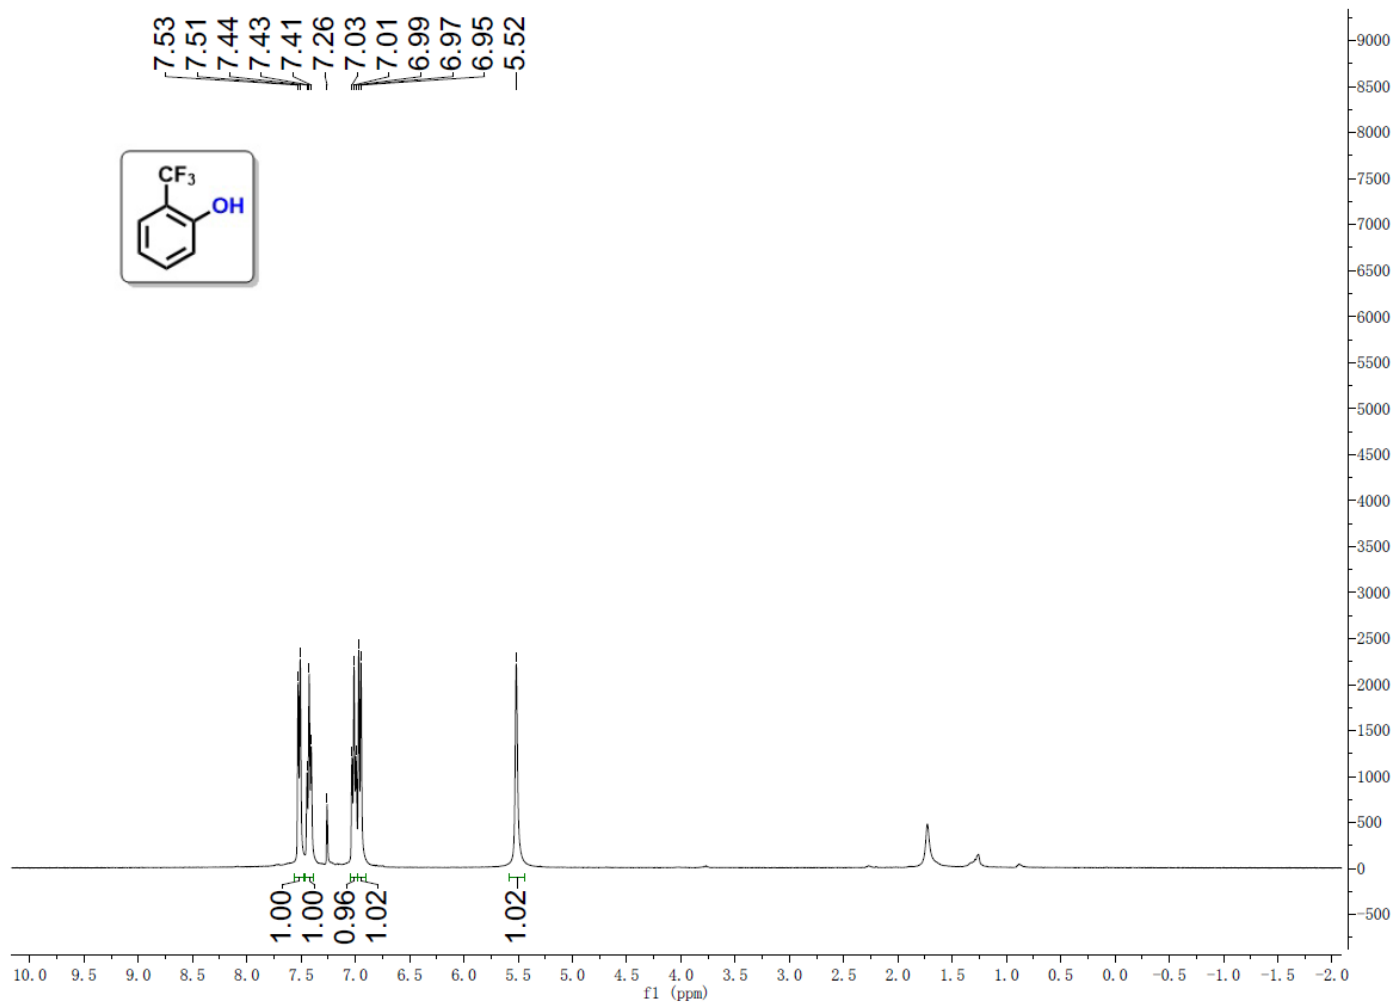

<sup>13</sup>C NMR of 2p

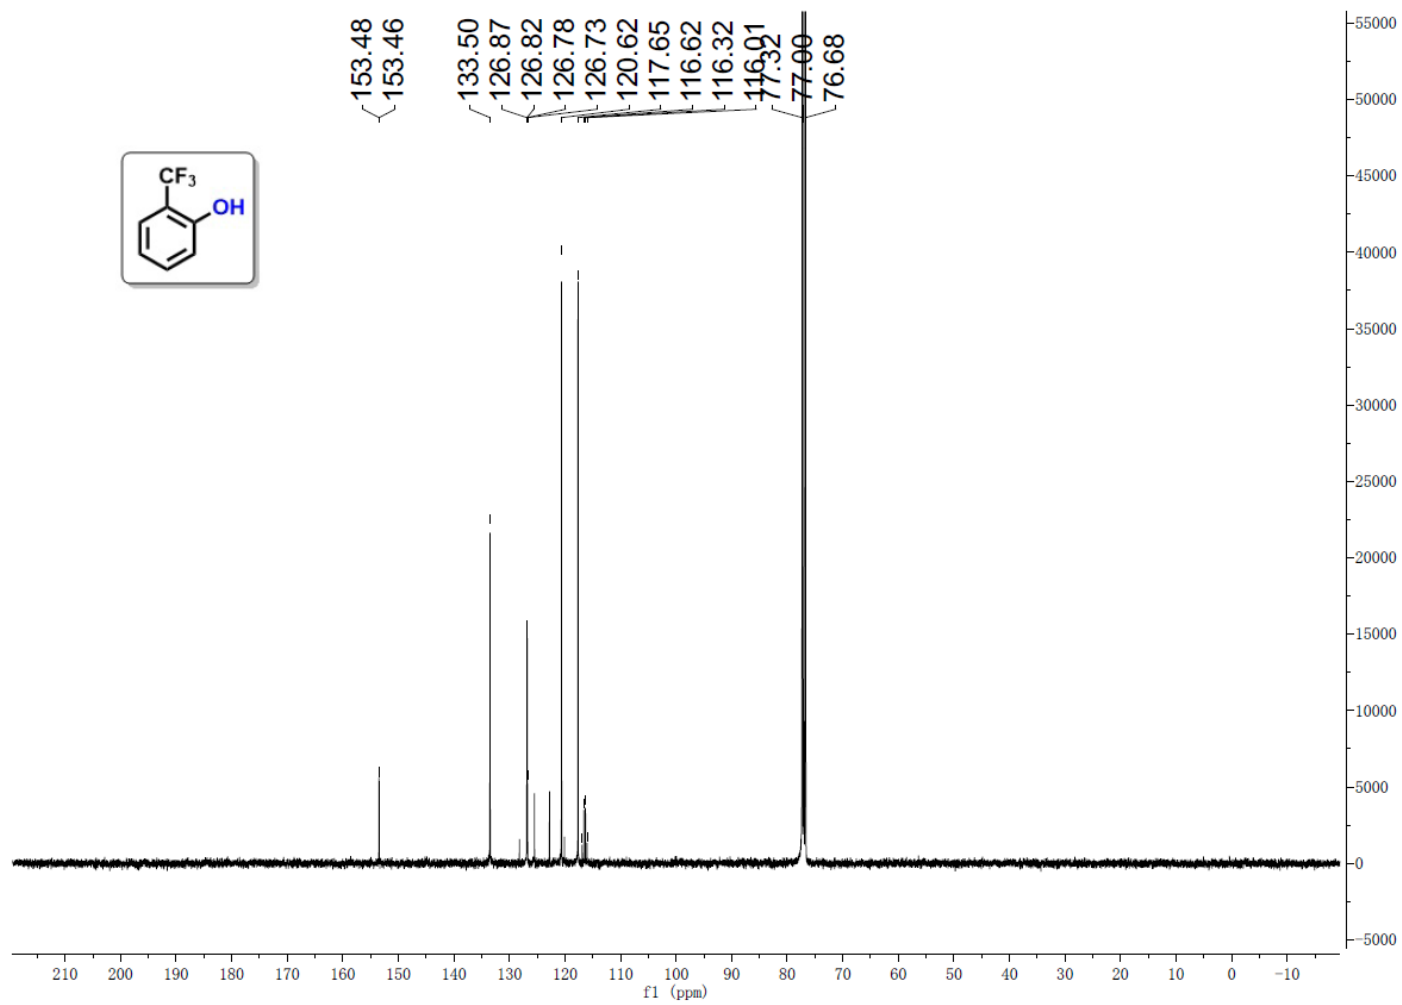

# <sup>19</sup>F NMR of 2p

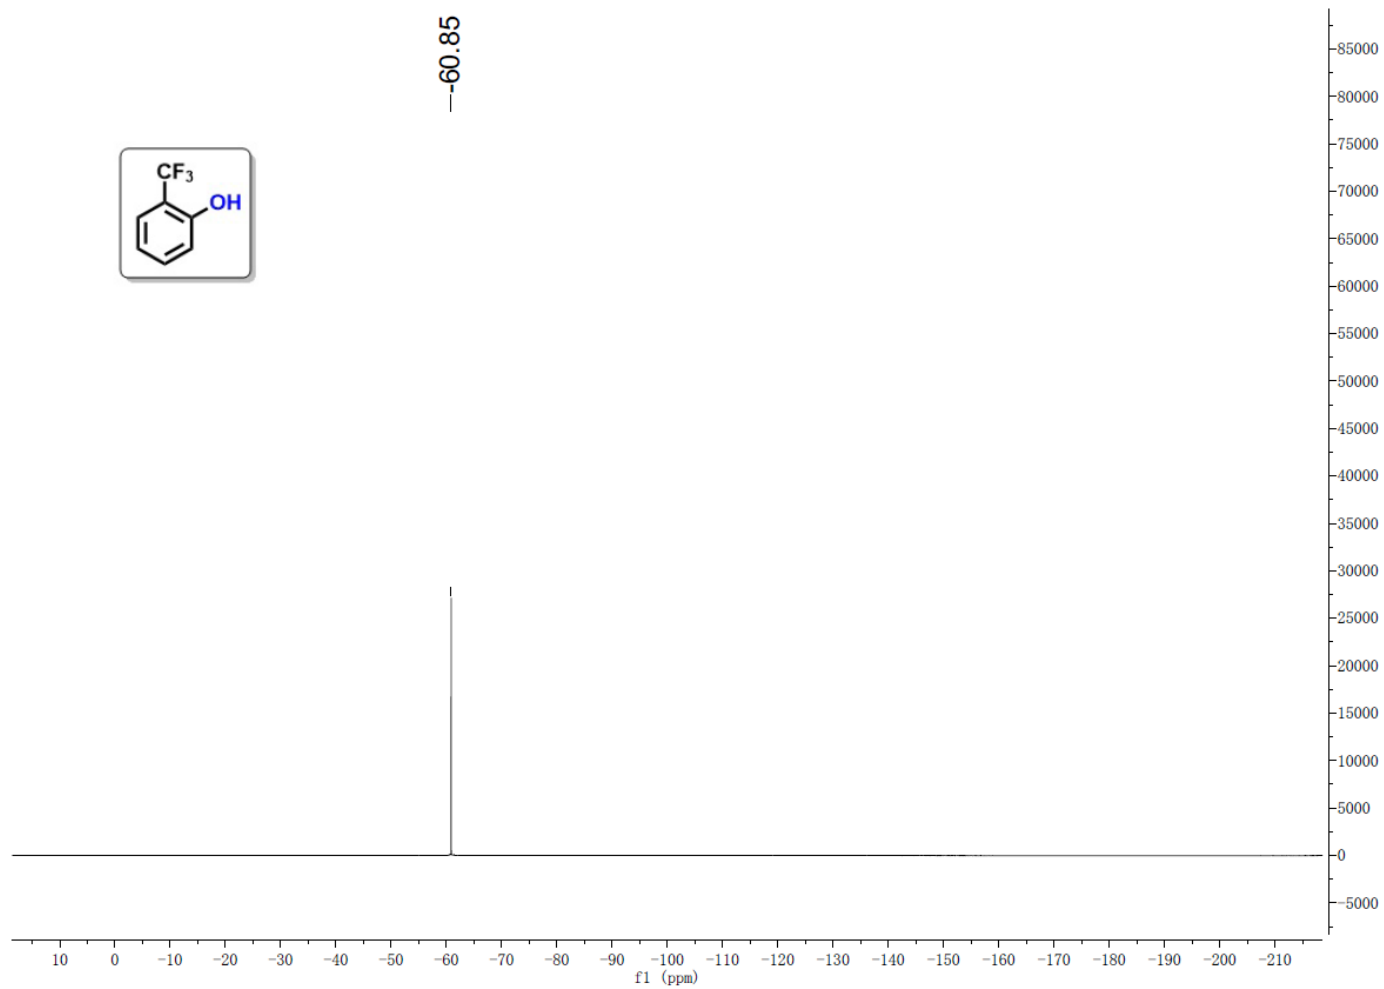

# <sup>1</sup>H NMR of 2q

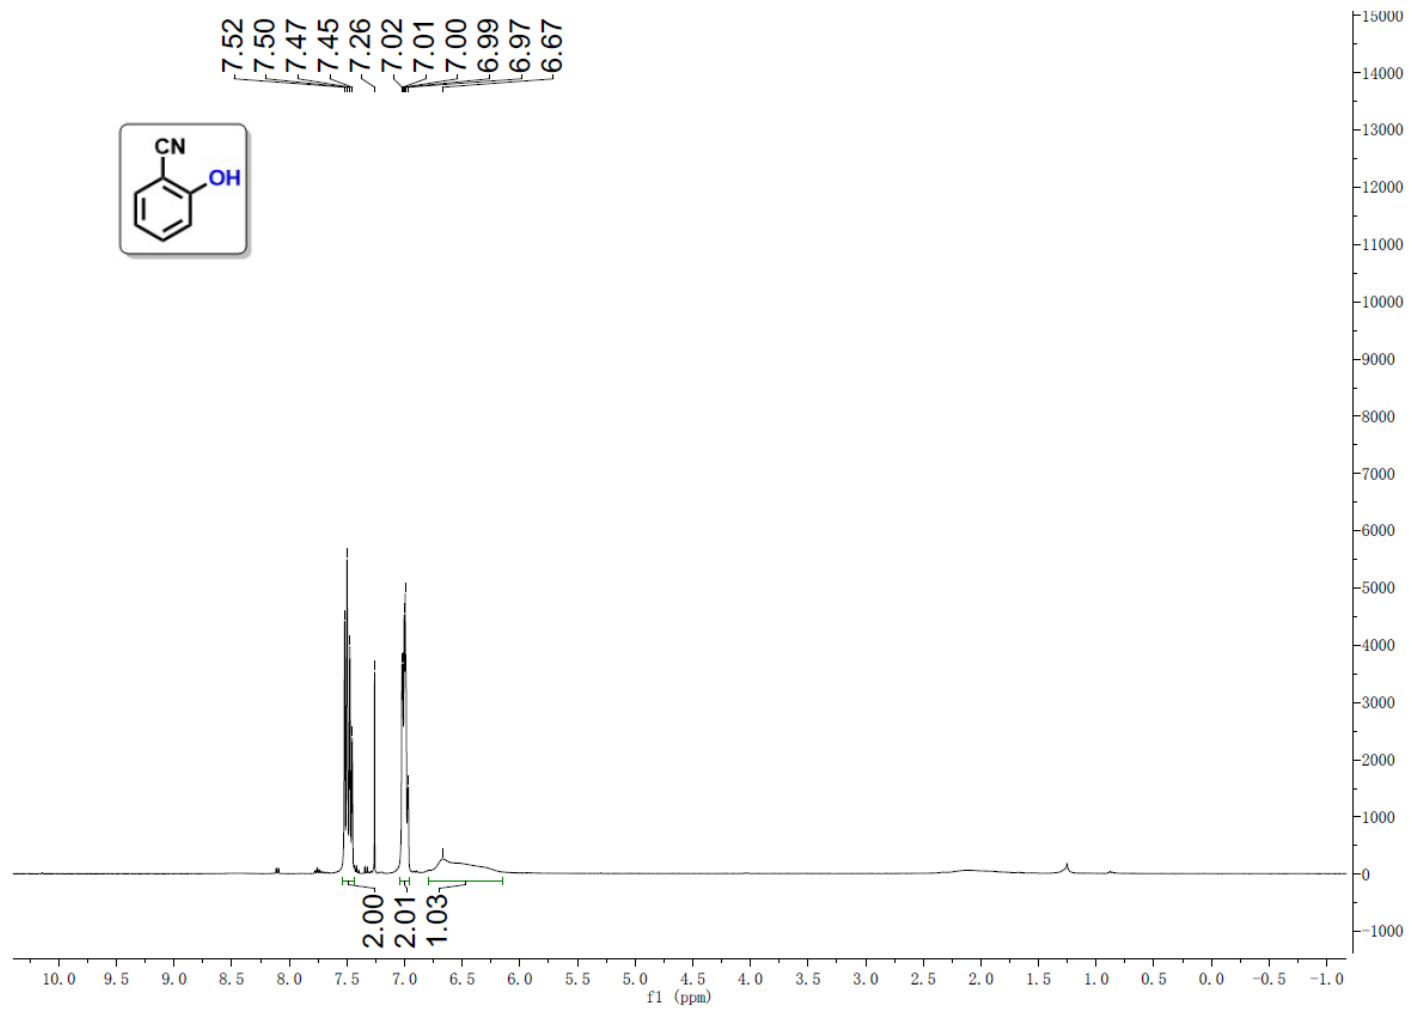

<sup>13</sup>C NMR of 2q

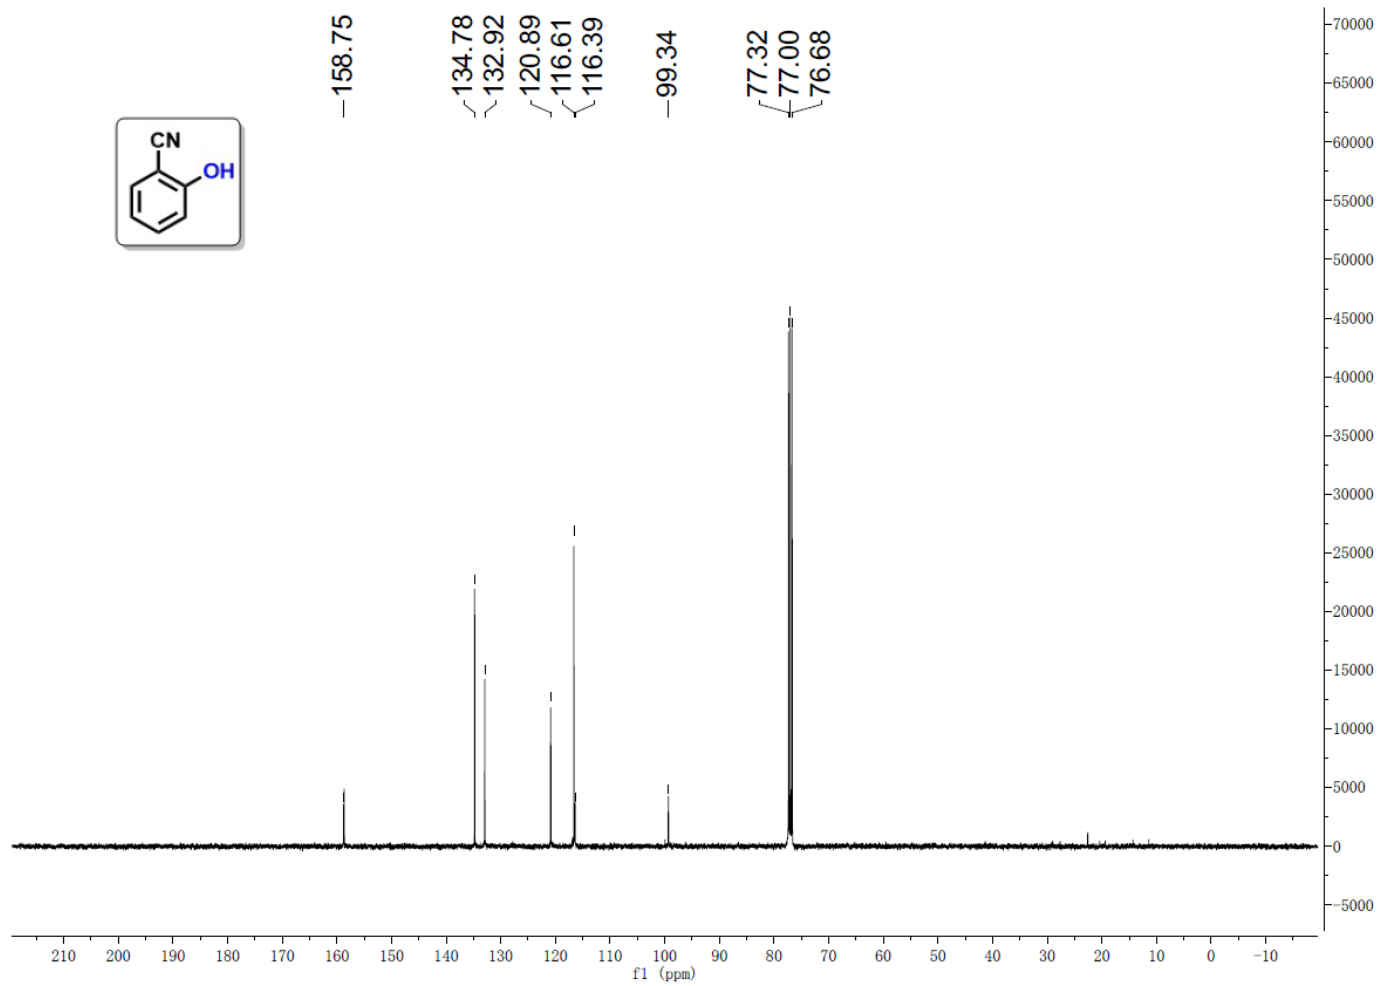

**<sup>1</sup>H NMR of 2r**

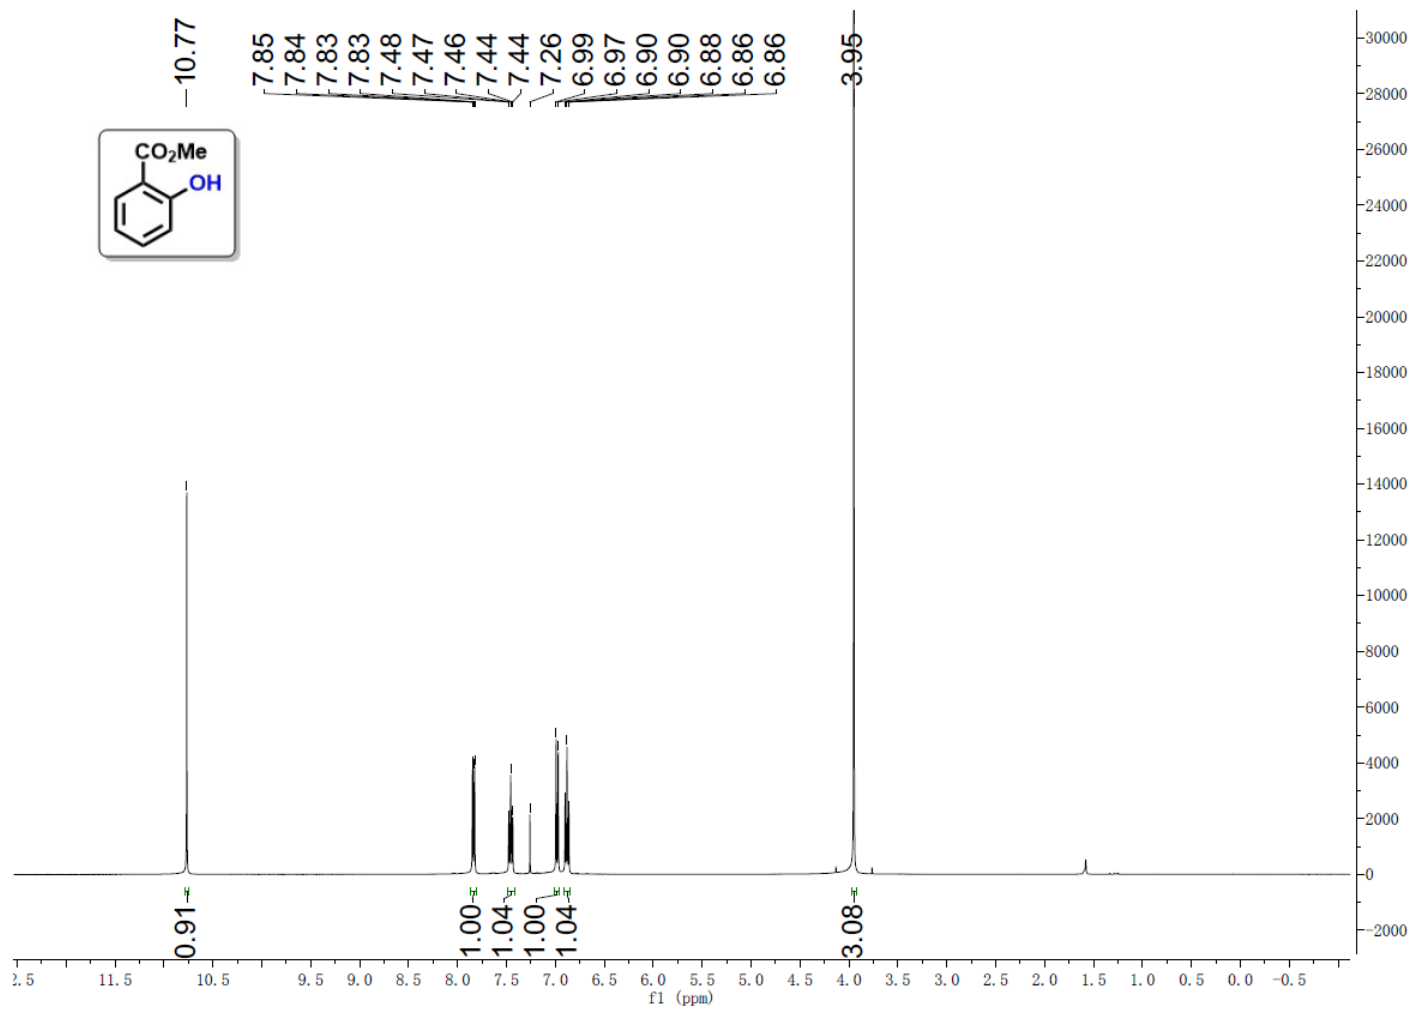

<sup>13</sup>C NMR of 2r

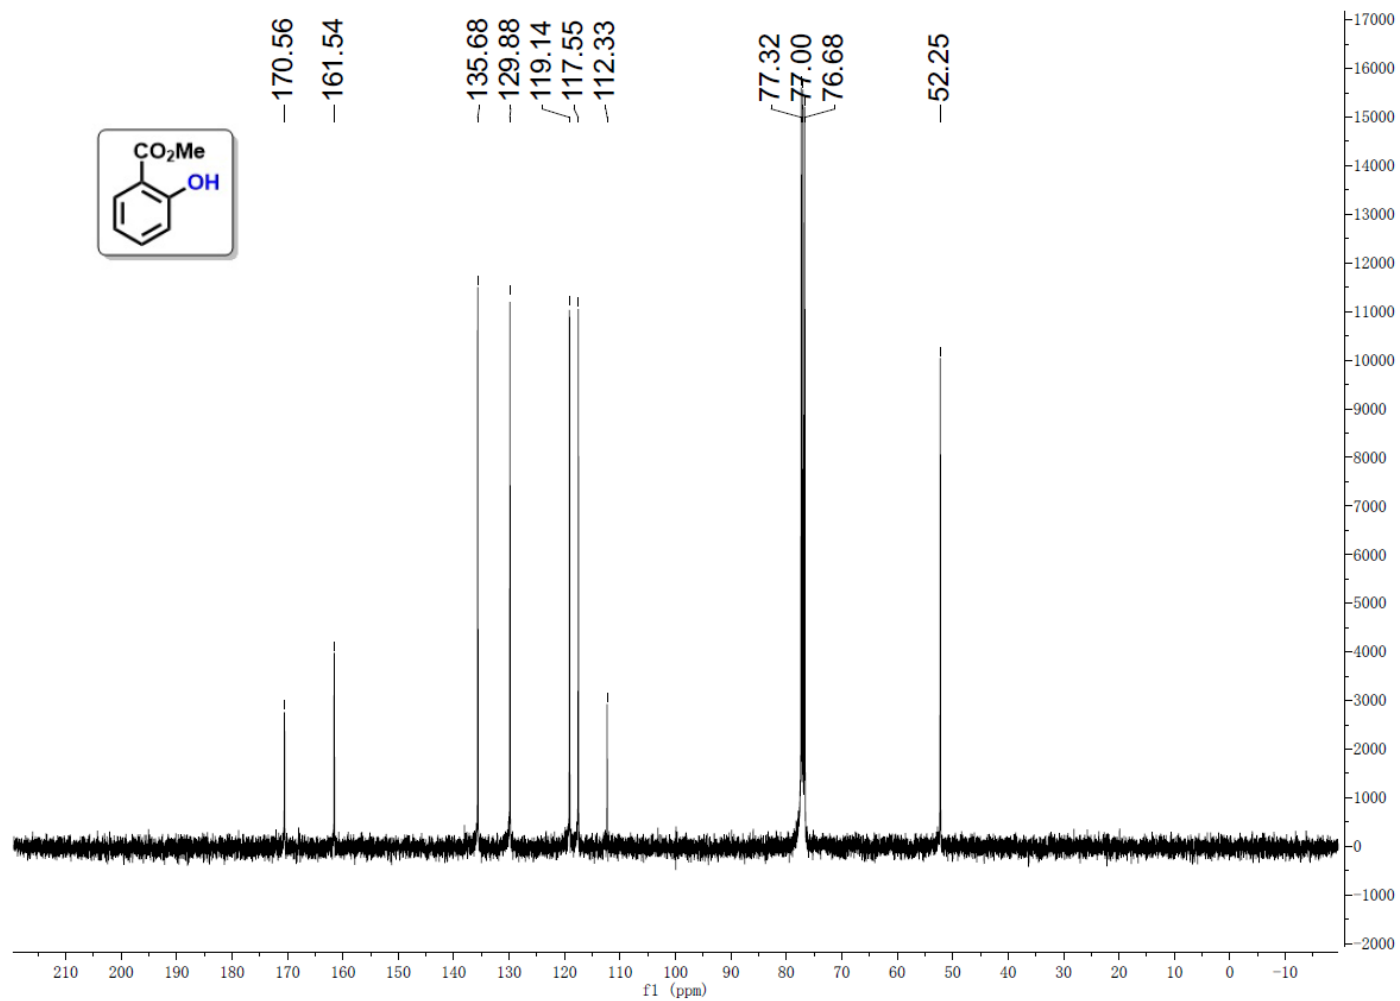

# <sup>1</sup>H NMR of 2s

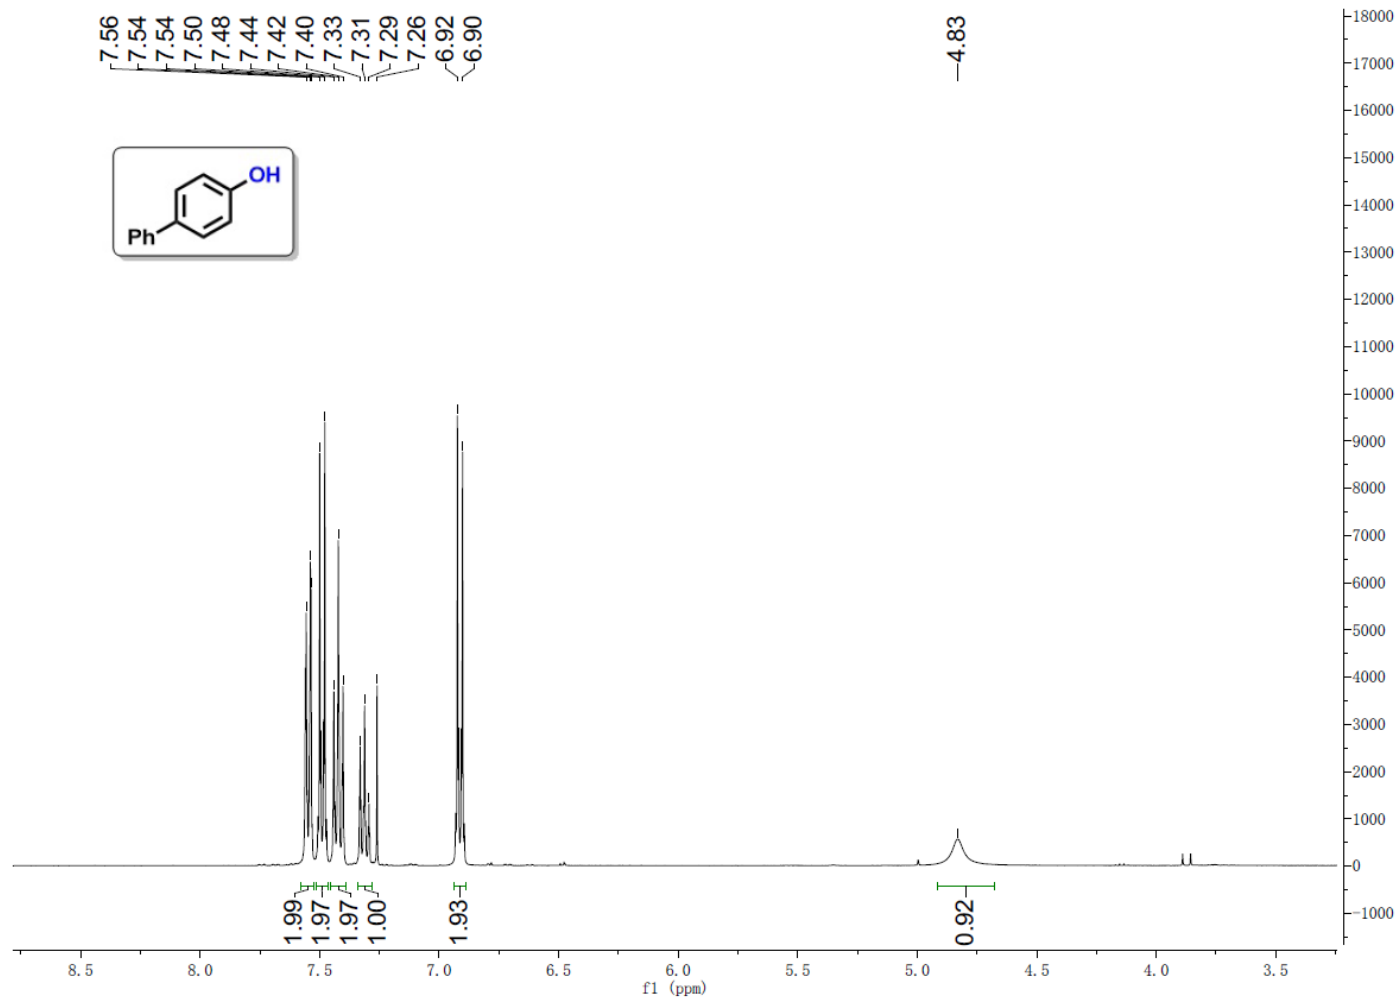



# <sup>13</sup>C NMR of 2s

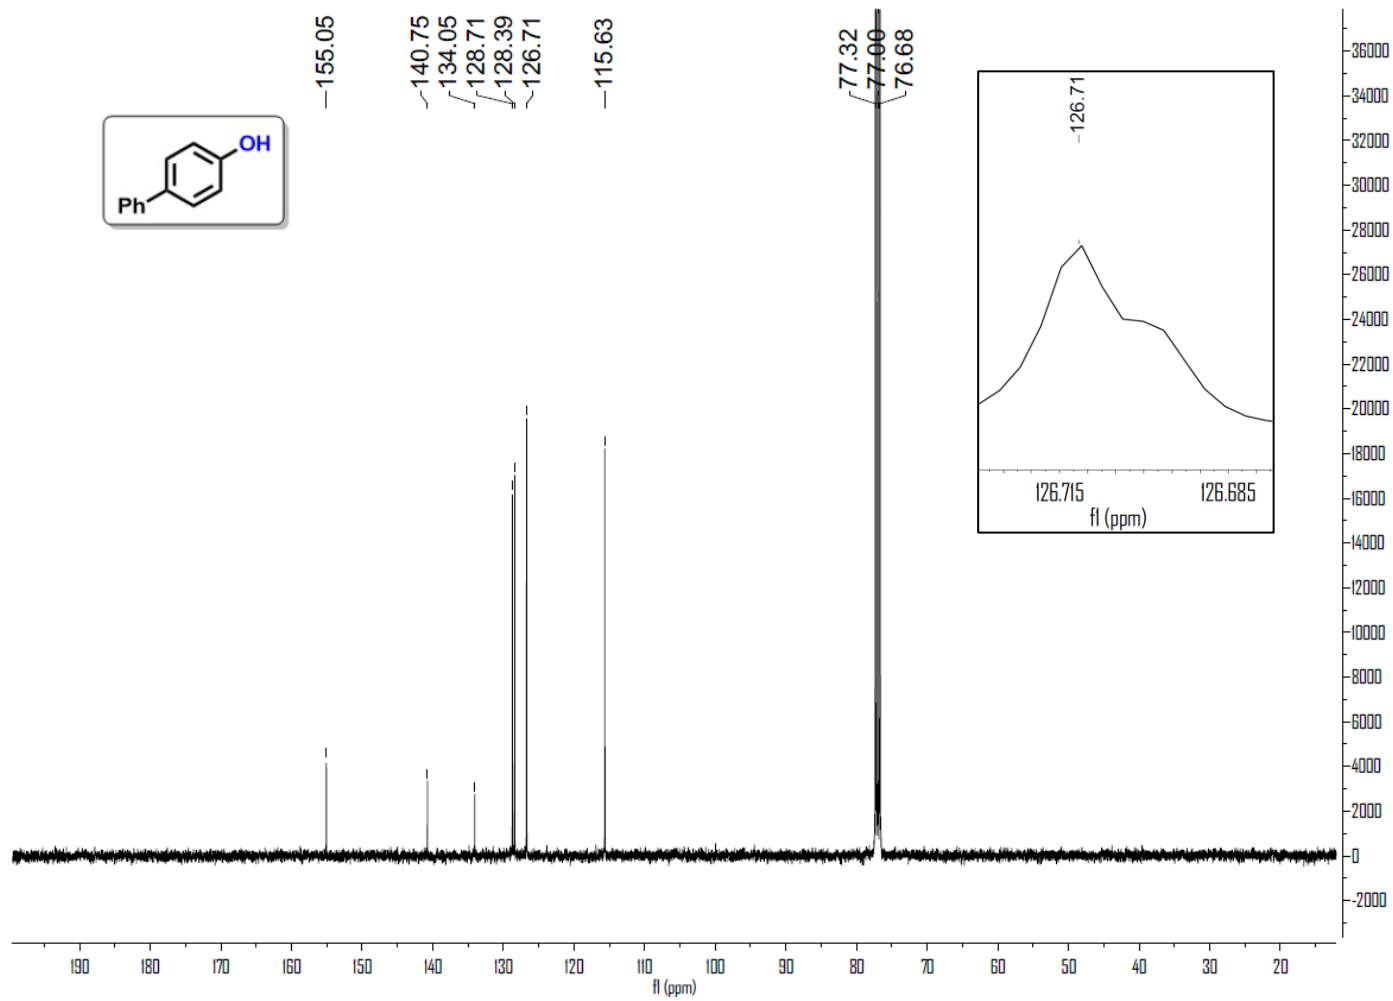

**<sup>1</sup>H NMR of 2t**

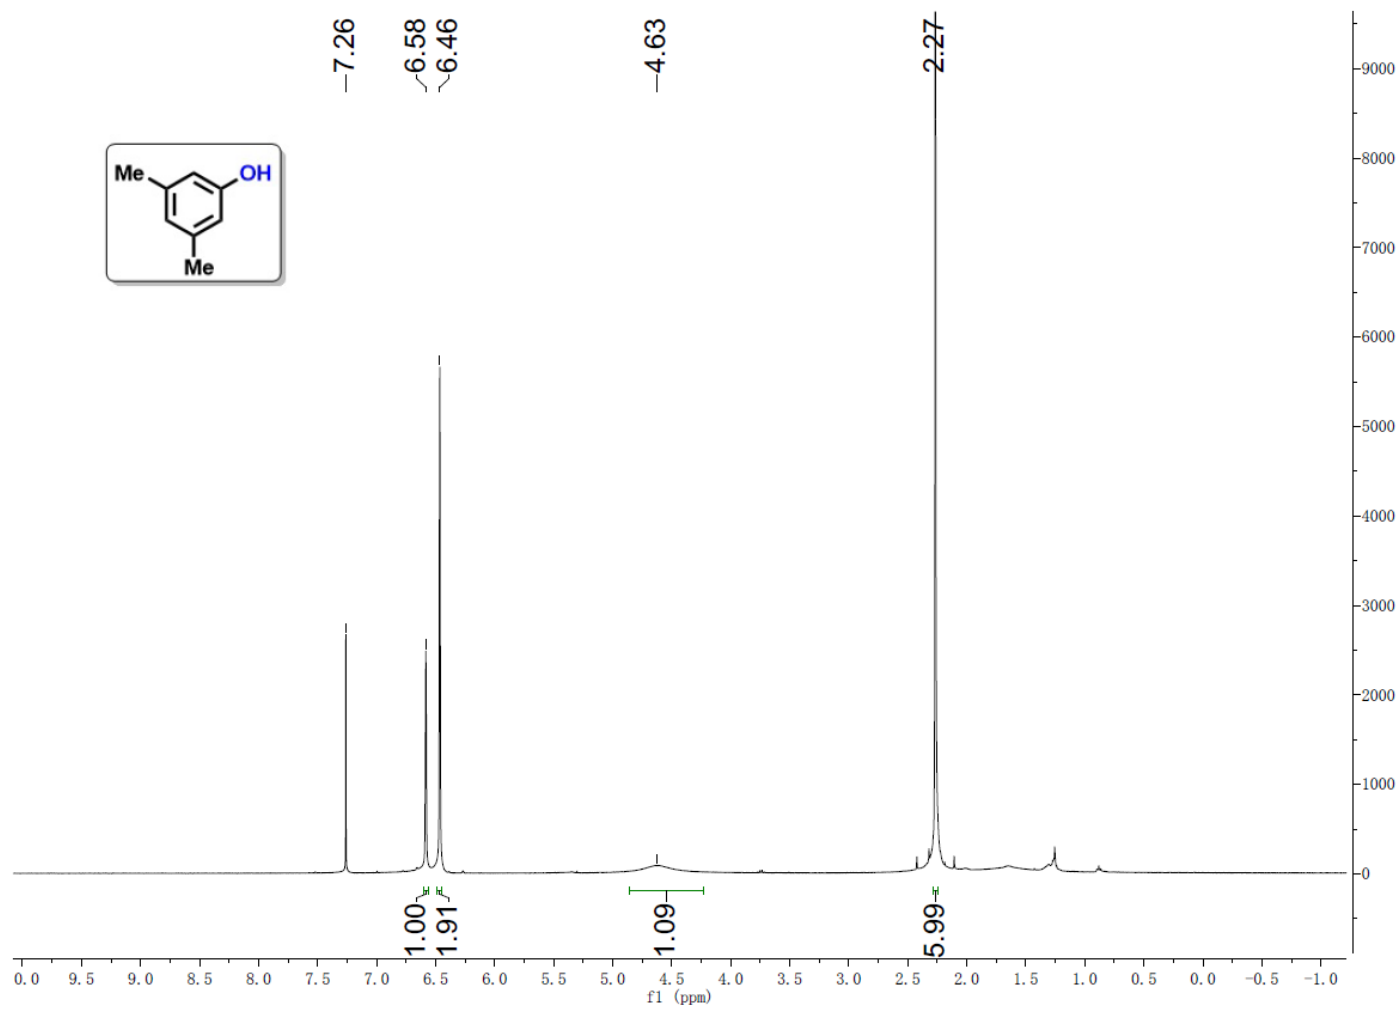

<sup>13</sup>C NMR of 2t

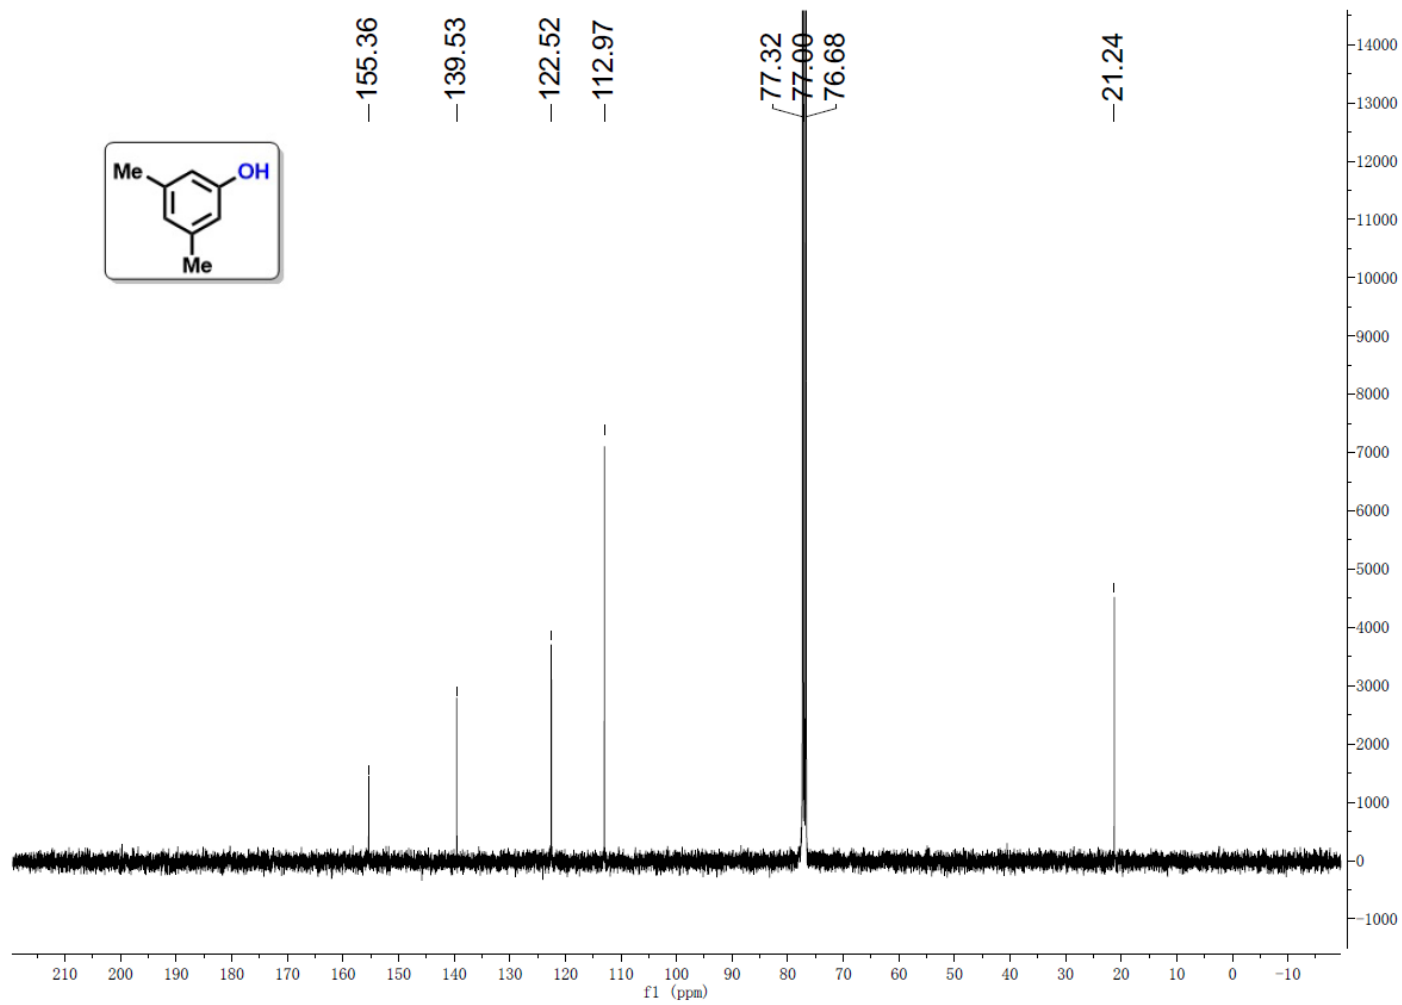

<sup>1</sup>H NMR of 2u

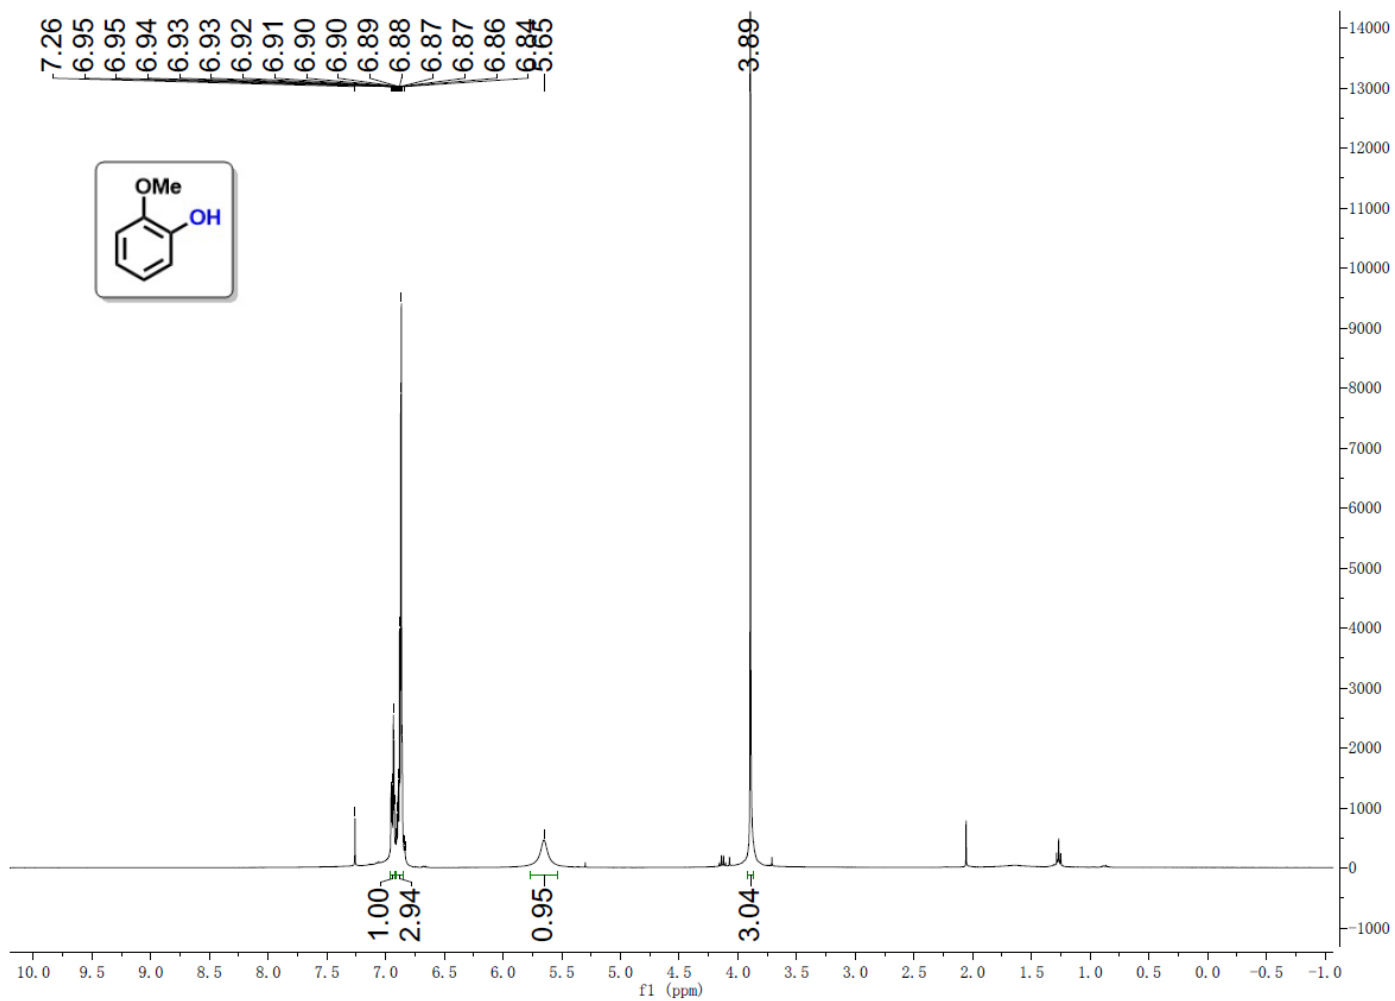

<sup>13</sup>C NMR of 2u

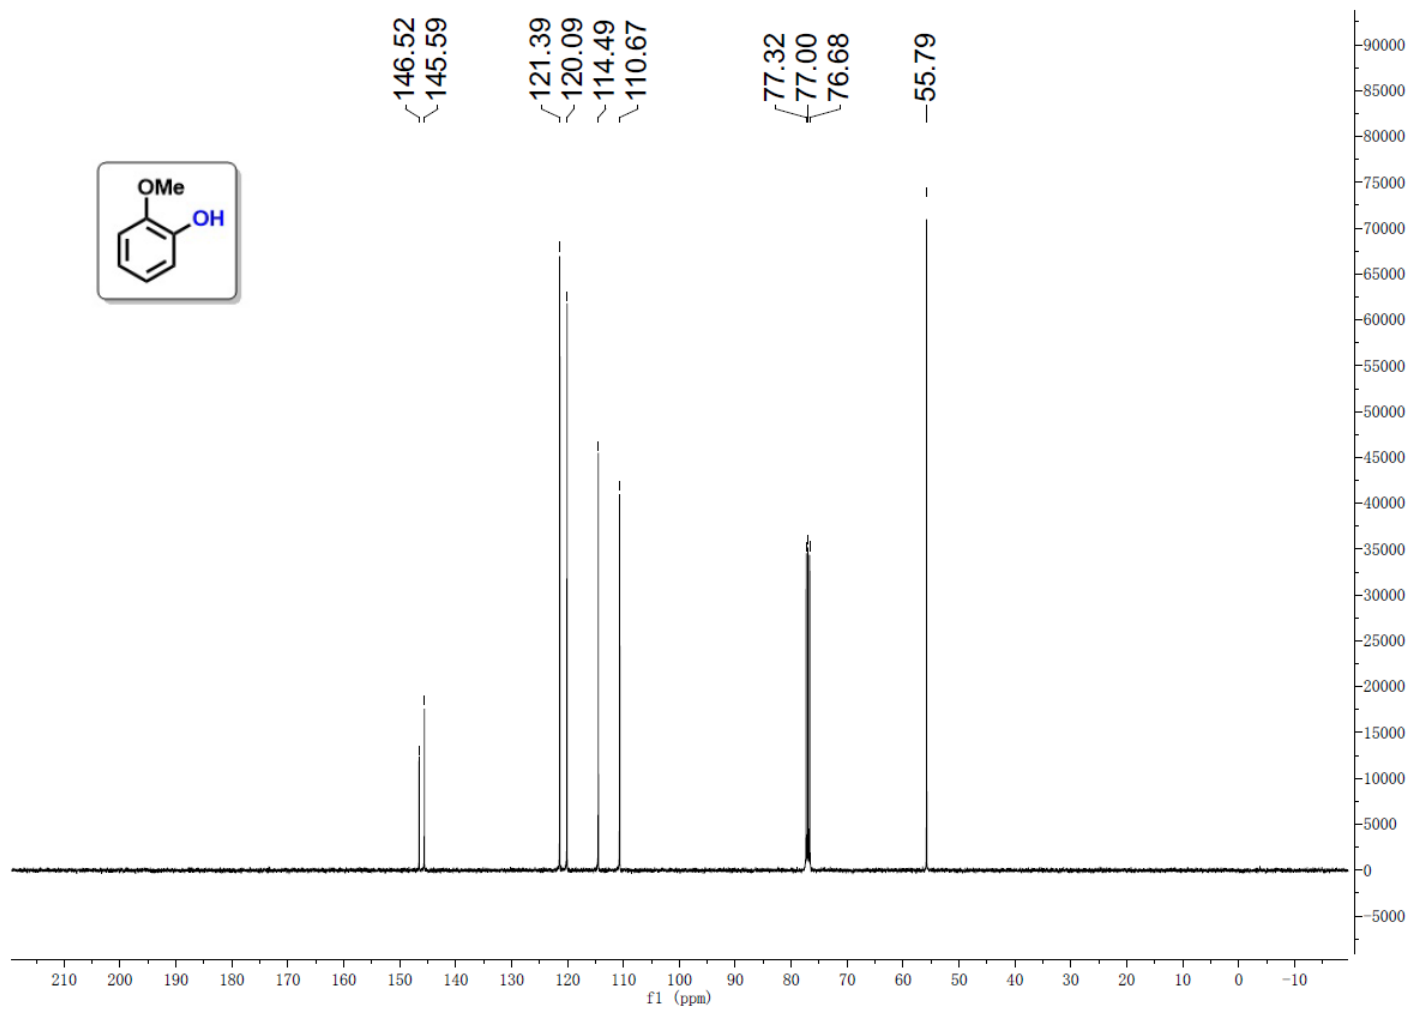

<sup>1</sup>H NMR of 2v

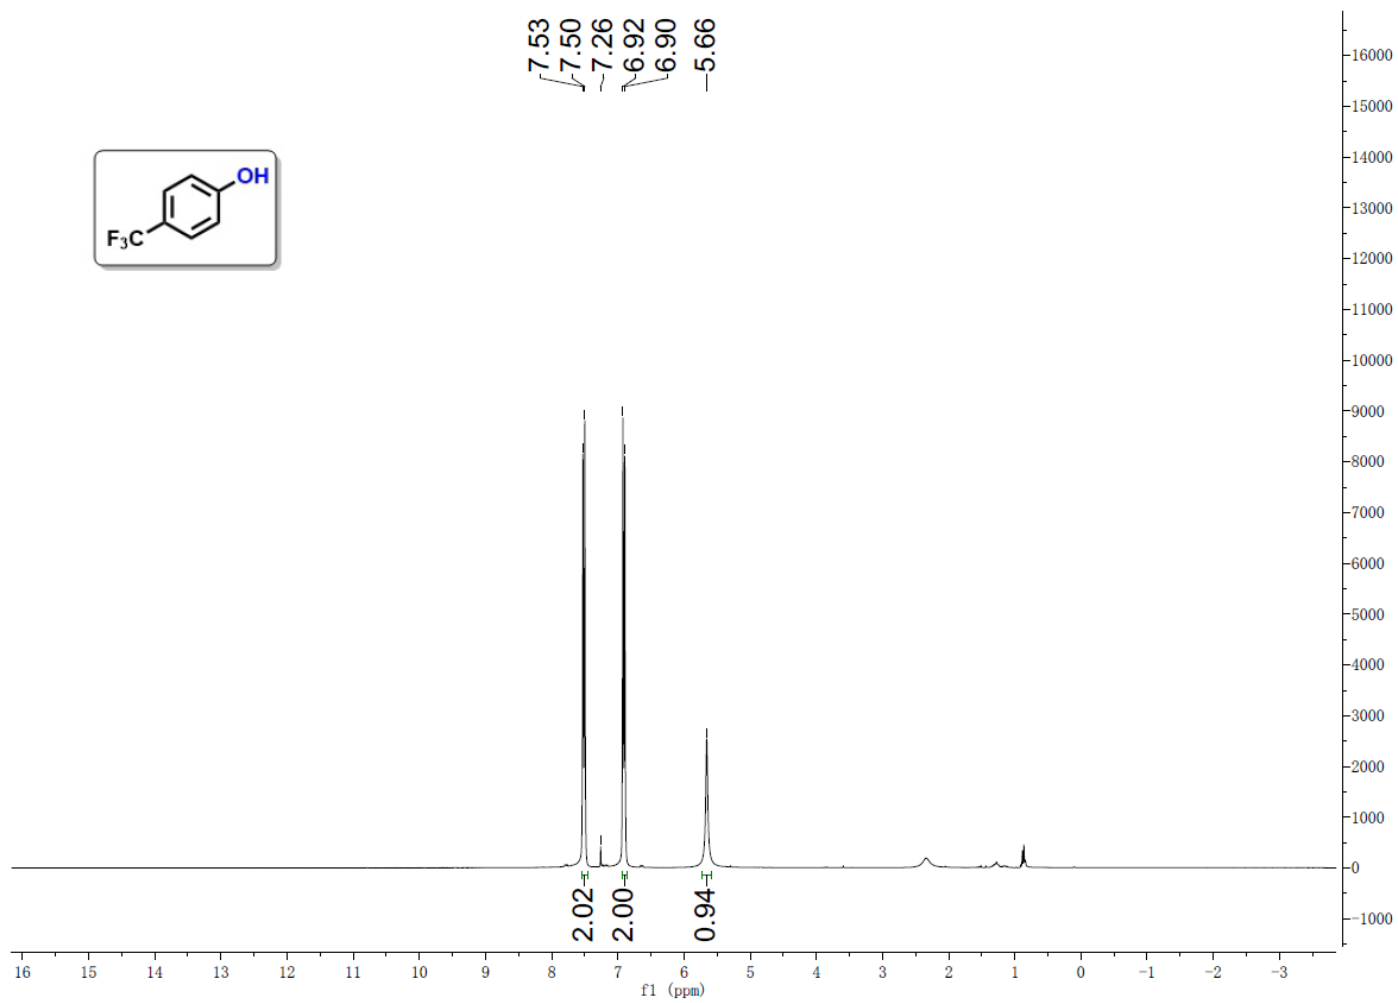

<sup>13</sup>C NMR of 2v

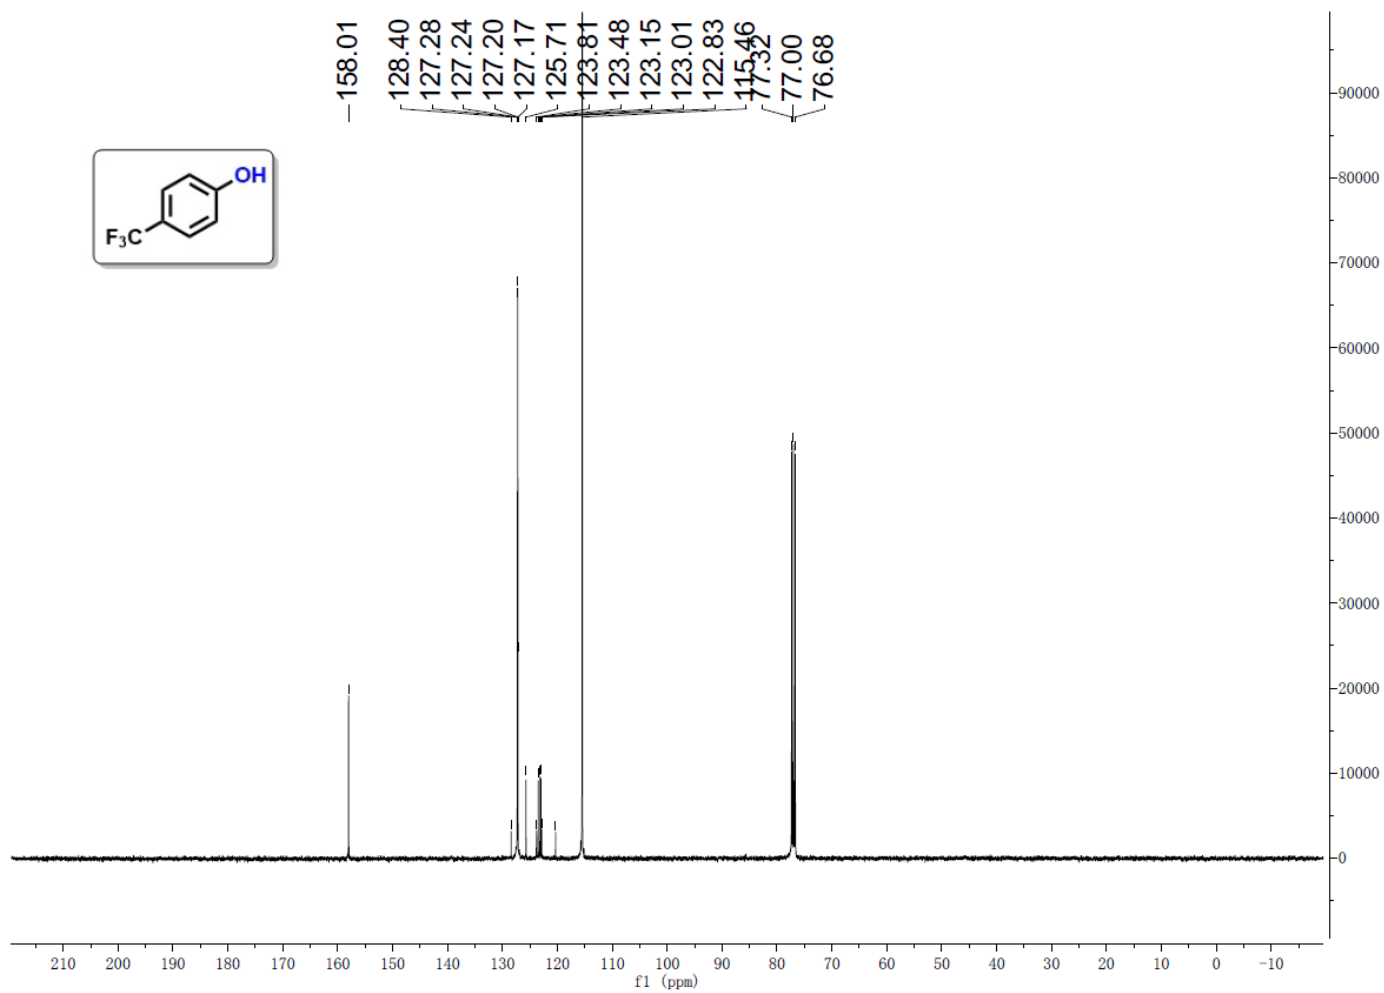

**$^{19}\text{F}$  NMR of 2v**

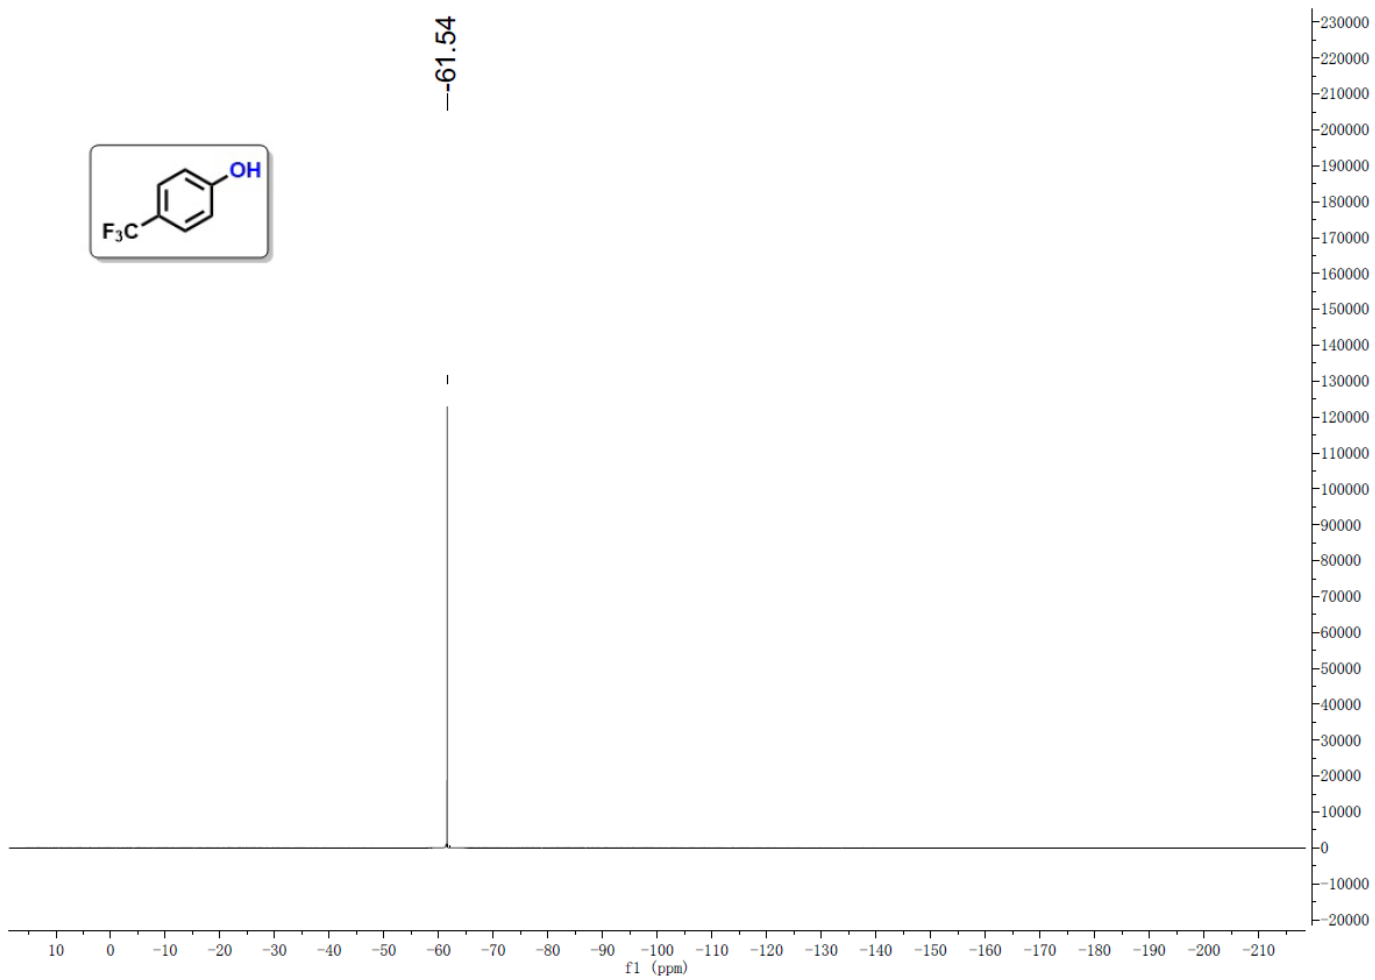



# <sup>1</sup>H NMR of 2w

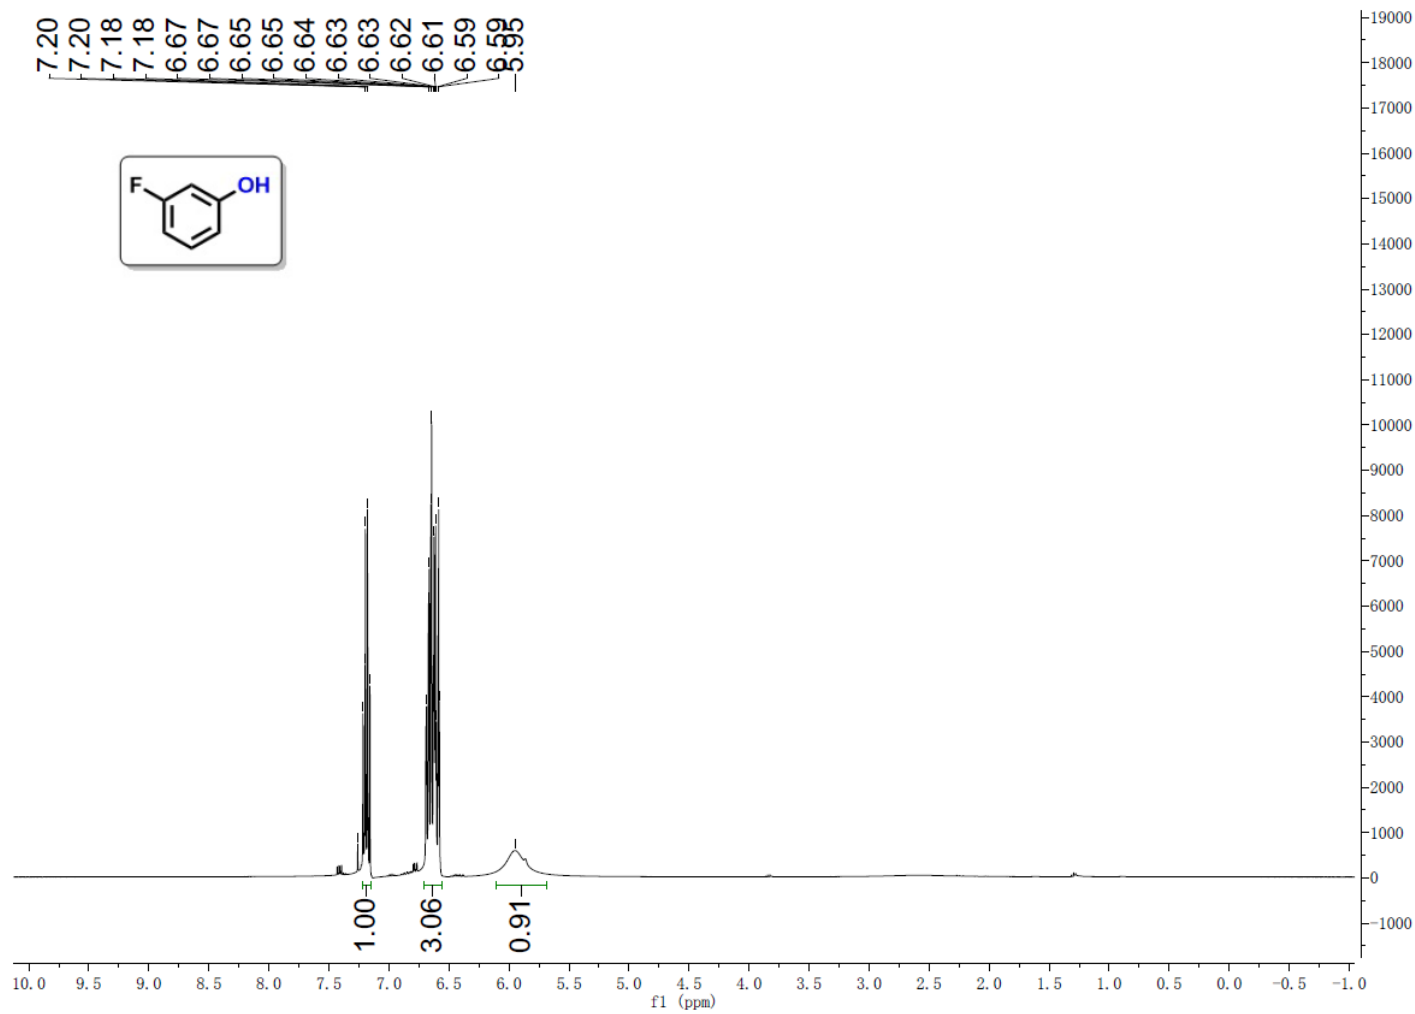

### <sup>13</sup>C NMR of 2w

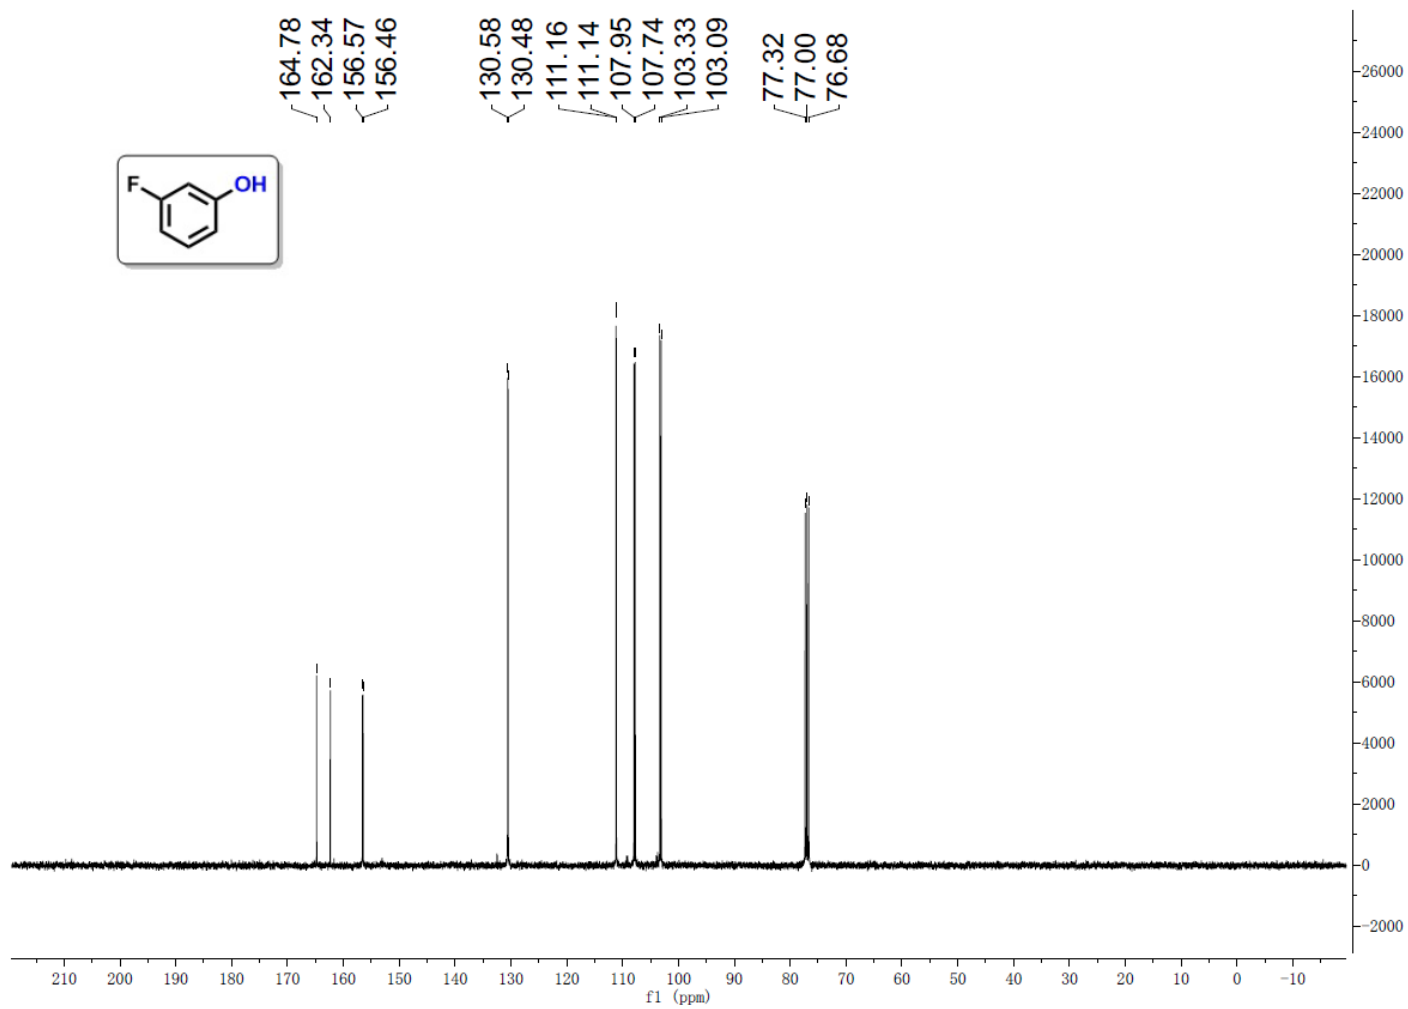

**$^{19}\text{F}$  NMR of 2w**

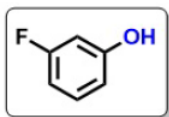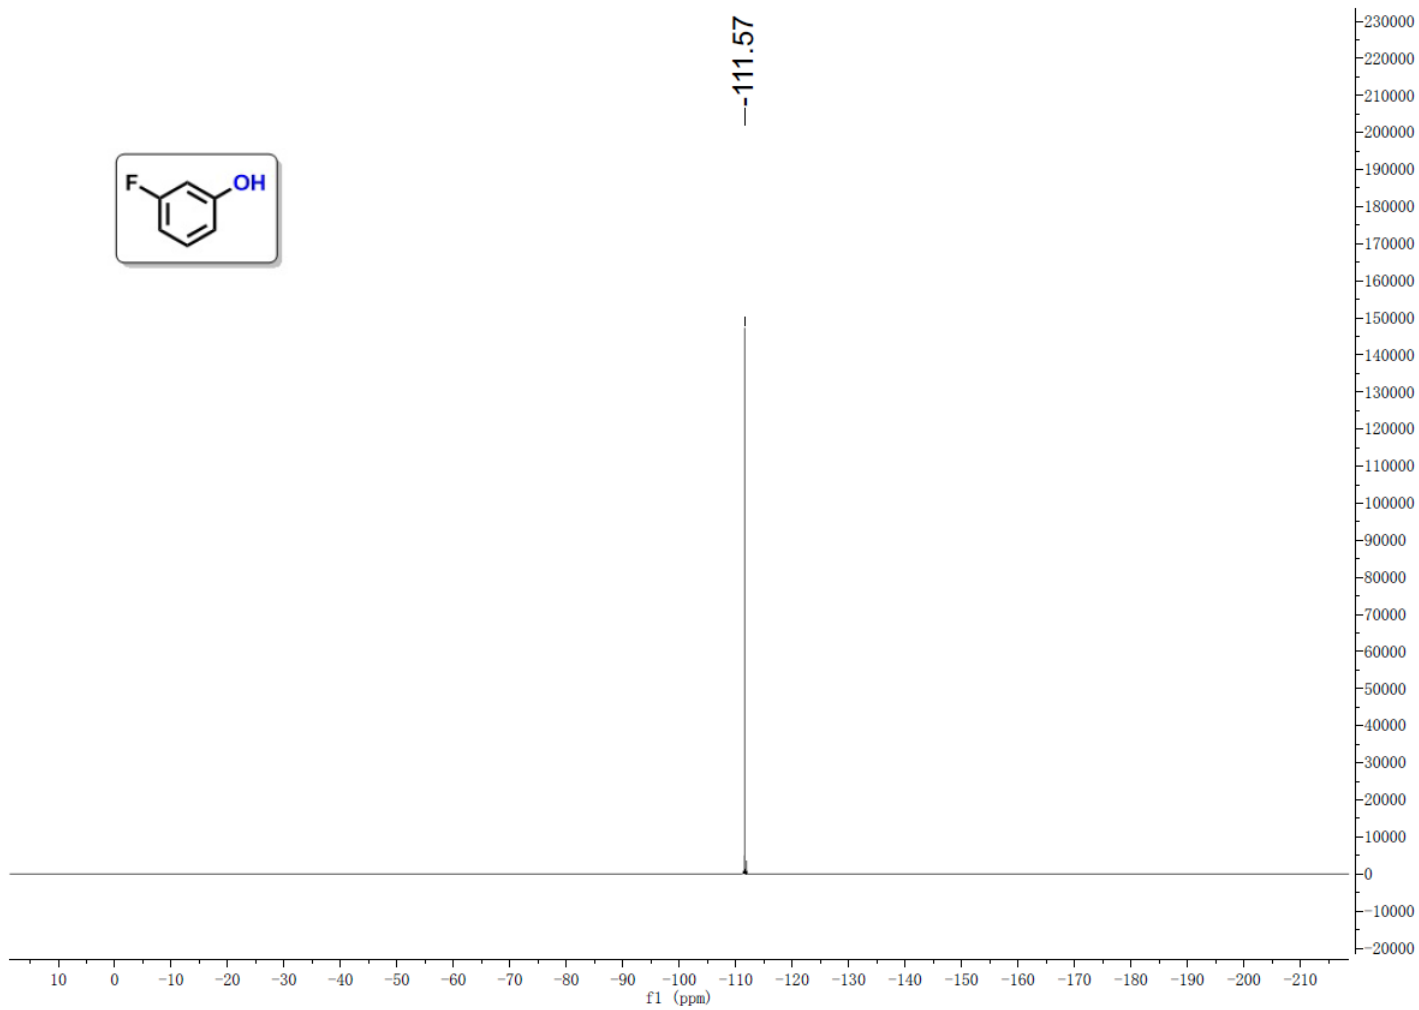

**<sup>1</sup>H NMR of 2x**

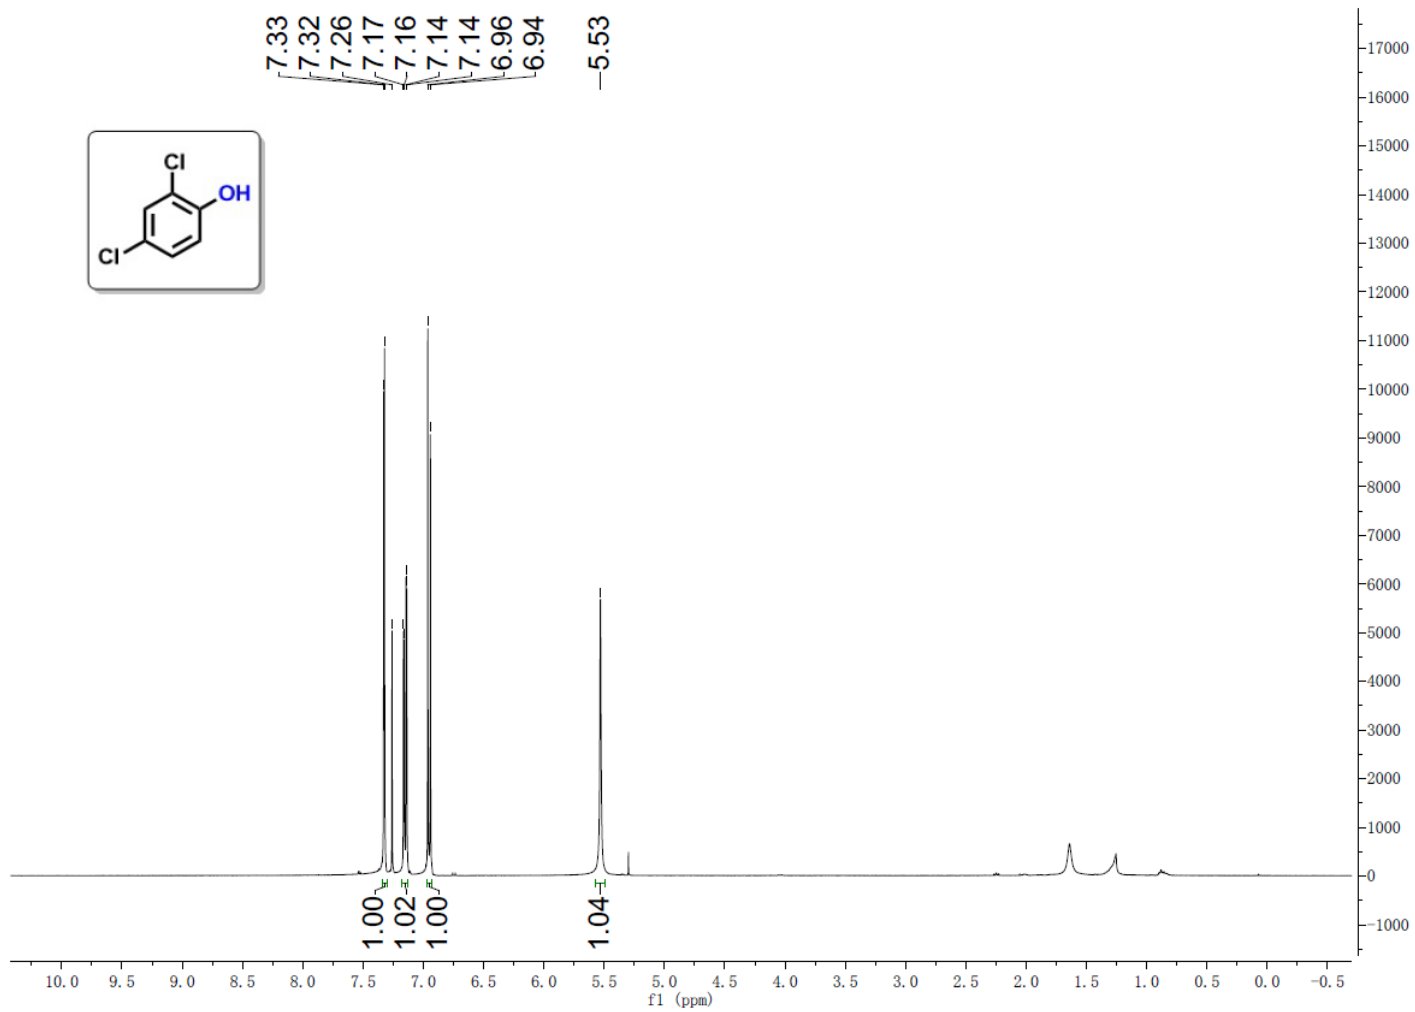

<sup>13</sup>C NMR of 2x

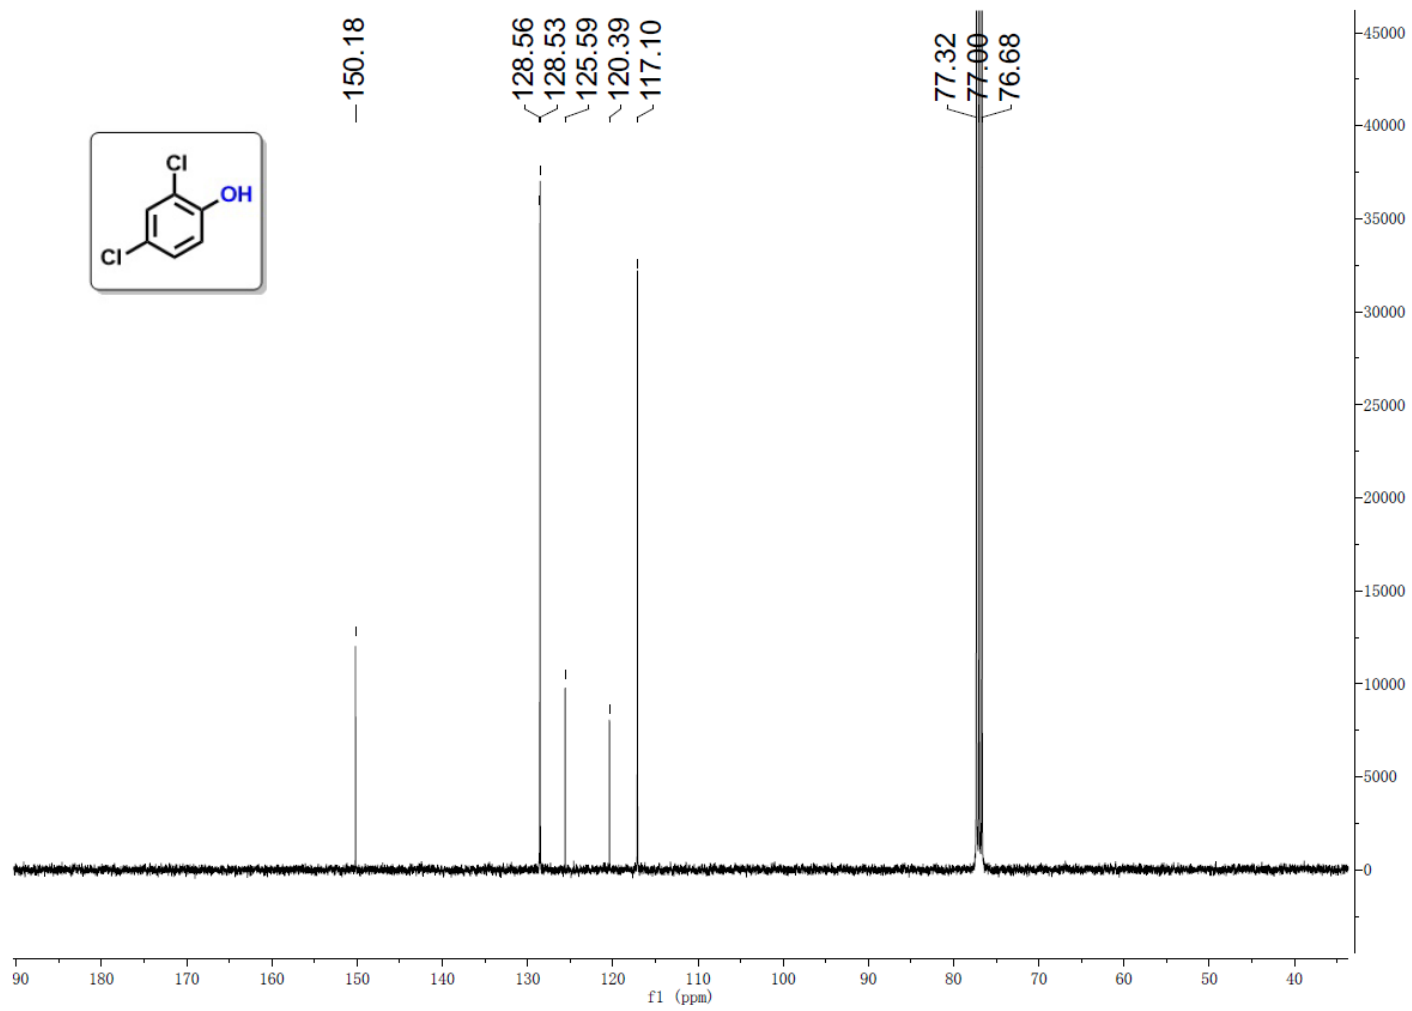

# <sup>1</sup>H NMR of 2y

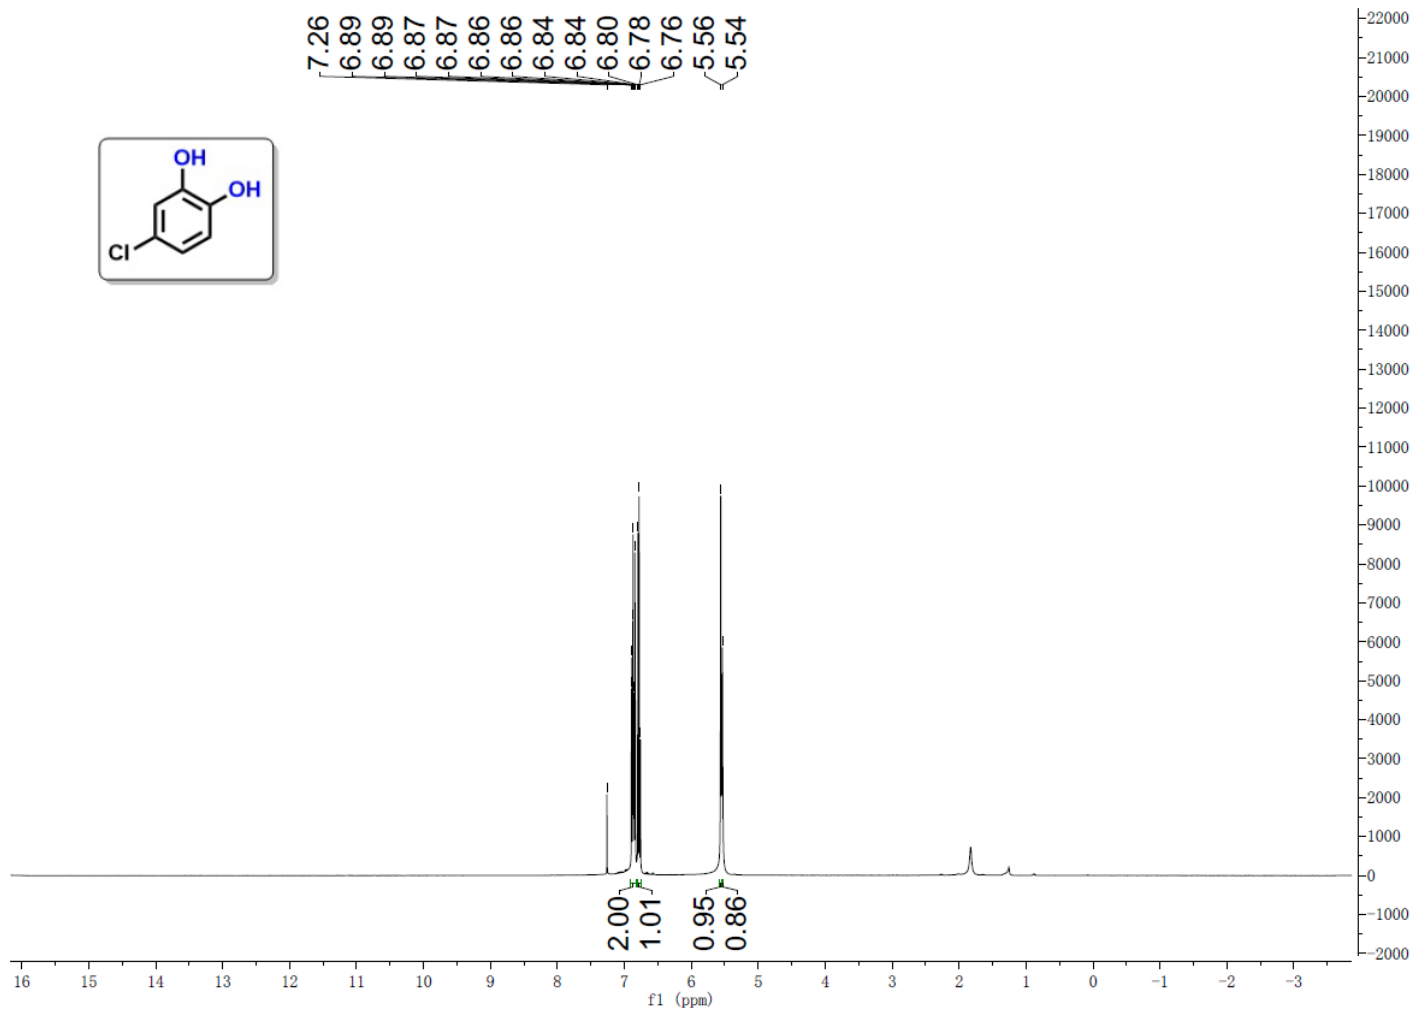

<sup>13</sup>C NMR of 2y

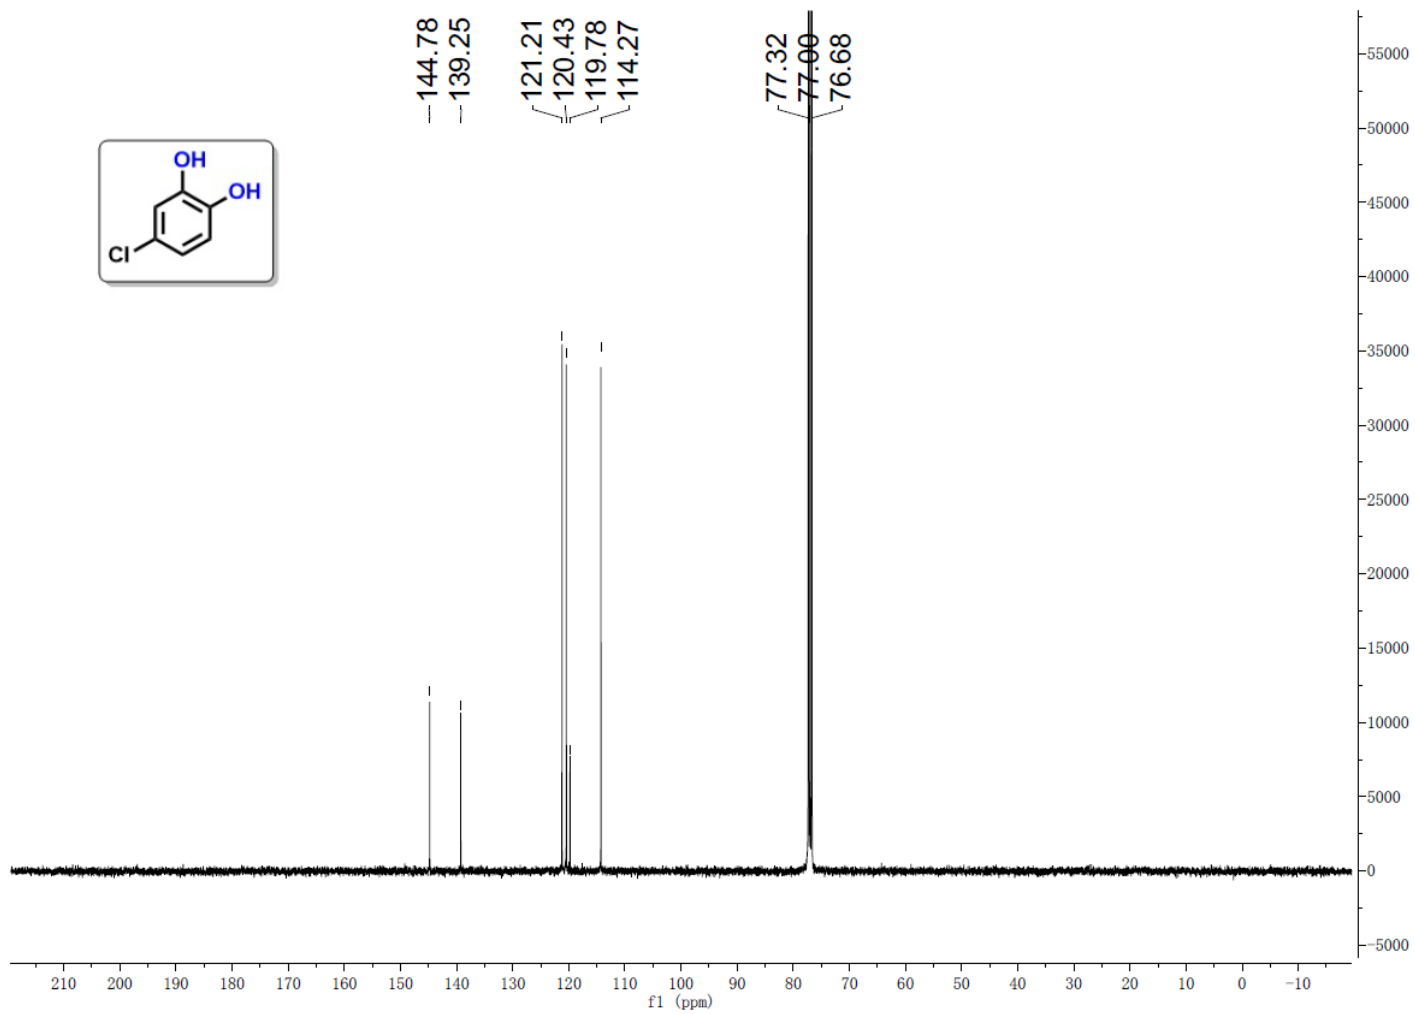

# <sup>1</sup>H NMR of 2z1

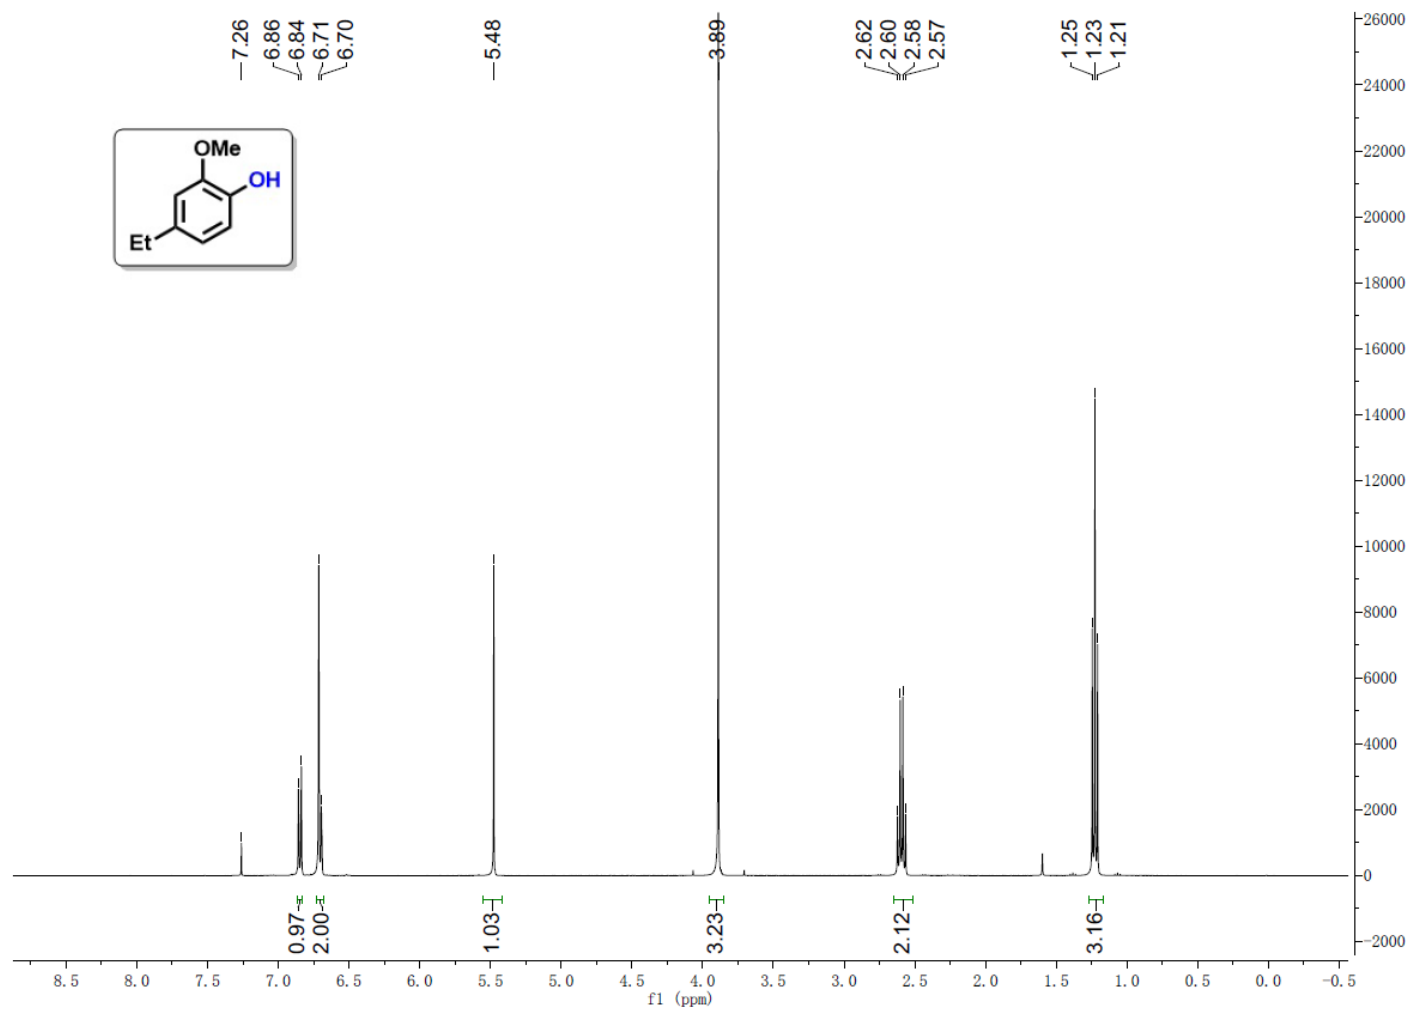



<sup>13</sup>C NMR of 2z1

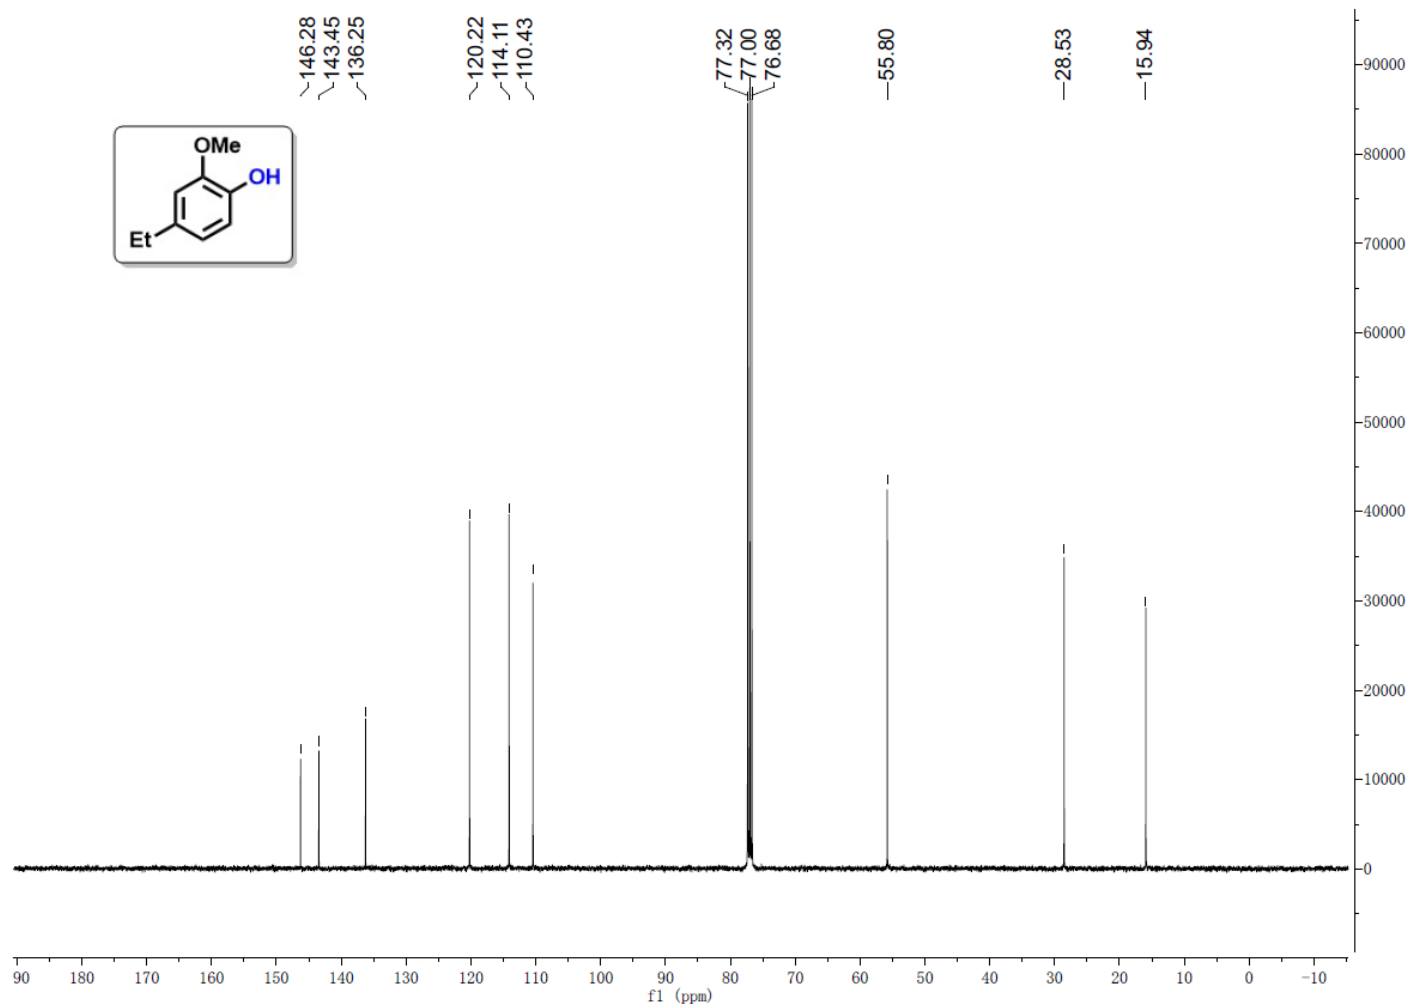

# <sup>1</sup>H NMR of 2z2

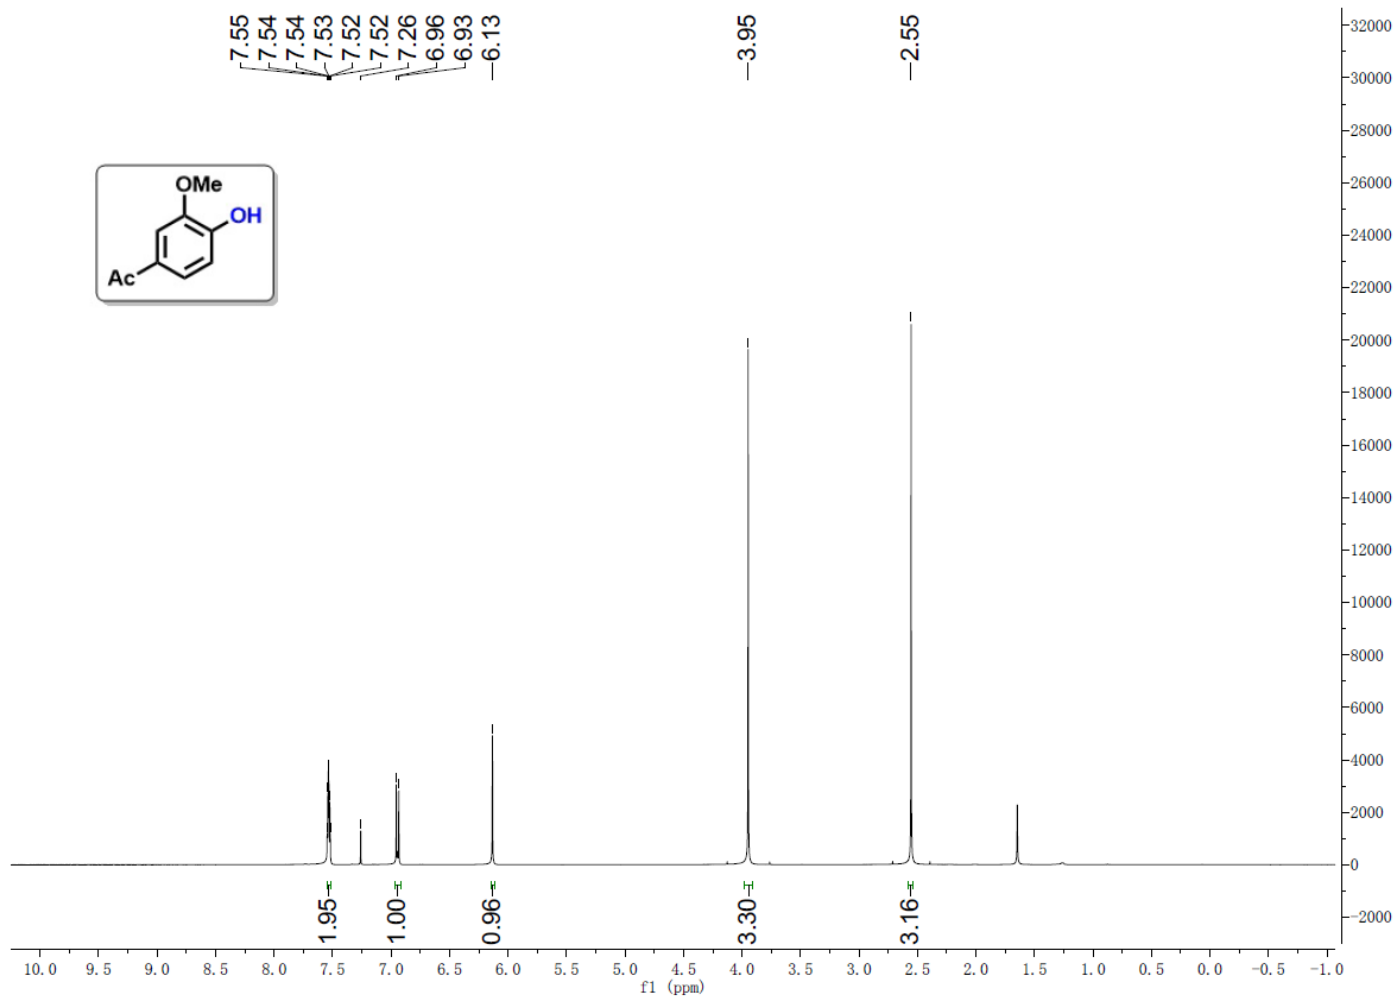

### <sup>13</sup>C NMR of 2z2

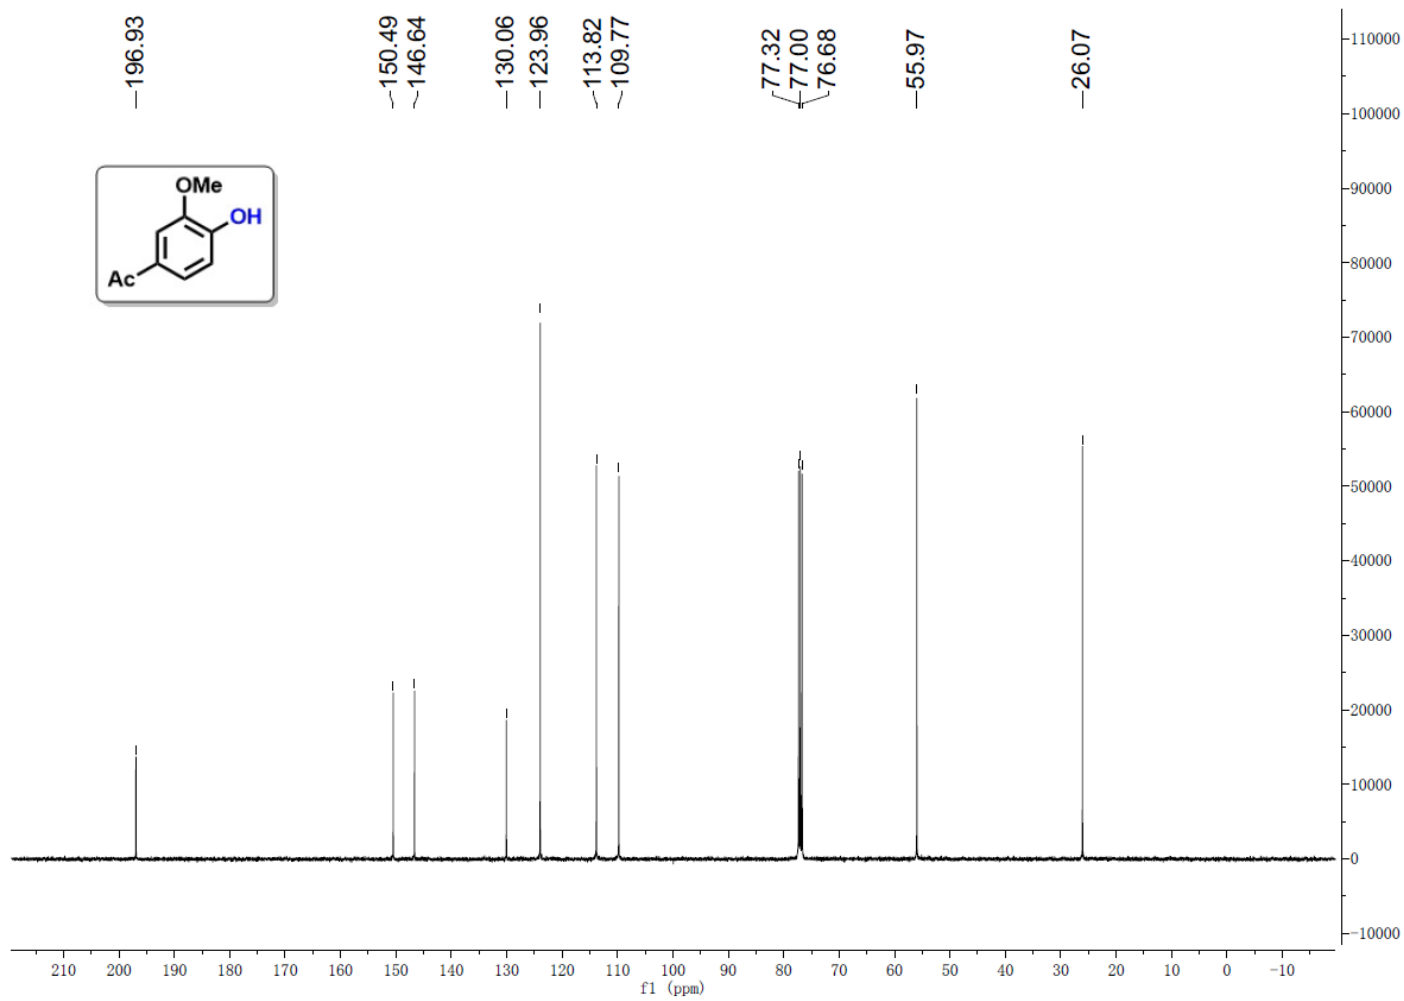

## VI. References:

1. Maiti, D.; Buchwald, S. L., Cu-Catalyzed Arylation of Phenols: Synthesis of Sterically Hindered and Heteroaryl Diaryl Ethers. *J. Org. Chem.* **2010**, *75*, 1791-1794.
2. Jing, L.; Wei, J.; Zhou, L.; Huang, Z.; Li, Z.; Zhou, X., Lithium pipecolinate as a facile and efficient ligand for copper-catalyzed hydroxylation of aryl halides in water. *Chem. Commun.* **2010**, *46*, 4767-4769.
3. Li, W.; Gao, G.; Gao, Y.; Yang, C.; Xia, W., Direct Oxidation of the C(*Sp*<sup>3</sup>)-C(*Sp*<sup>3</sup>) Bond from Benzyltrimethylsilanes to Phenols. *Chem. Commun.* **2017**, *53*, 5291-5293.
4. Zhu, C.; Wang, R.; Falck, J. R., Mild and Rapid Hydroxylation of Aryl/Heteroaryl Boronic Acids and Boronate Esters with N-Oxides. *Org. Lett.* **2012**, *14*, 3494-3497.
5. Yang, L.; Huang, Z.; Li, G.; Zhang, W.; Cao, R.; Wang, C.; Xiao, J.; Xue, D., Synthesis of Phenols: Organophotoredox/Nickel Dual Catalytic Hydroxylation of Aryl Halides with Water. **2018**, *57*, 1968-1972.
6. Li, G.; Gao, P.; Lv, X.; Qu, C.; Yan, Q.; Wang, Y.; Yang, S.; Wang, J., Synthesis of m-Alkylphenols via a Ruthenium-Catalyzed C-H Bond Functionalization of Phenol Derivatives. *Org. Lett.* **2017**, *19*, 2682-2685.
7. Morin, J.; Zhao, Y.; Snieckus, V., Reductive Cleavage of Aryl O-Carbamates to Phenols by the Schwartz Reagent. Expedient Link to the Directed Ortho Metalation Strategy. *Org. Lett.* **2013**, *15*, 4102-4105.
8. Xu, J.; Wang, X.; Shao, C.; Su, D.; Cheng, G.; Hu, Y., Highly Efficient Synthesis of Phenols by Copper-Catalyzed Oxidative Hydroxylation of Arylboronic Acids at Room Temperature in Water. *Org. Lett.* **2010**, *12*, 1964-1967.
9. Zou, L.; Li, P.; Wang, B.; Wang, L., Visible-Light-Induced Pd-Catalyzed *ortho*-Trifluoromethylation of Acetanilides with CF<sub>3</sub>SO<sub>2</sub>Na under Ambient Conditions in the Absence of an External Photocatalyst. *Chem. Commun.* **2019**, *55*, 3737-3740.
10. Lin, F.; Song, Q.; Gao, Y.; Cui, X., A Catalyst-Free, Facile and Efficient Approach to Cyclic Esters: Synthesis of 4H-Benzo[d][1,3]Dioxin-4-ones. *RSC Adv.* **2014**, *4*, 19856-19860.
11. Sang, D.; Wang, J.; Zheng, Y.; He, J.; Yuan, C.; An, Q.; Tian, J., Carbodiimides as Acid Scavengers in Aluminum Tri-iodide Induced Cleavage of Alkyl Aryl Ethers. *Synthesis-Stuttgart.* **2017**, *49*, 2721-2726.
12. Pan, S.; Zhou, B.; Zhang, Y.; Shao, C.; Shi, G., A Versatile Approach for the Synthesis of para-Substituted Arenes via Palladium-Catalyzed C-H Functionalization and Protodecarboxylation of Benzoic Acids. *Synlett.* **2016**, *27*, 277-281.
13. Reitti, M.; Gurubrahamam, R.; Walther, M.; Lindstedt, E.; Olofsson, B., Synthesis of Phenols and Aryl Silyl Ethers via Arylation of Complementary Hydroxide Surrogates. *Org. Lett.* **2018**, *20*, 1785-1788.
14. Yang, H.-M.; Liu, M.-L.; Tu, J.-W.; Miura-Stempel, E.; Campbell, M. G.; Chuang, G. J., Bimetallic Photoredox Catalysis: Visible Light-Promoted Aerobic Hydroxylation of Arylboronic Acids with a Dirhodium(II) Catalyst. *J. Org. Chem.* **2020**, *85*, 2040-2047.
15. Beekman, A. M.; Barrow, R. A., Syntheses of the Fungal Metabolites Boletopsins 7, 11, and 12 from the Papua New Guinea Medicinal Mushroom Boletopsis sp. *J. Org. Chem.* **2014**, *79*, 1017-1024.
16. Petitjean, L.; Gagne, R.; Beach, E. S.; Xiao, D. Q.; Anastas, P. T., Highly Selective Hydroge-

nation and Hydrogenolysis Using a Copper-Doped Porous Metal Oxide Catalyst. *Green Chem.* **2016**, *18*, 150-156.

17. Magallanes, G.; Kärkäs, M. D.; Bosque, I.; Lee, S.; Maldonado, S.; Stephenson, C. R. J., Selective C–O Bond Cleavage of Lignin Systems and Polymers Enabled by Sequential Palladium-Catalyzed Aerobic Oxidation and Visible-Light Photoredox Catalysis. *ACS Catal.* **2019**, *9*, 2252-2260.
